# Supplementary material for: PhyEffector, the First Algorithm That Identifies Classical and Non-Classical Effectors in Phytoplasmas
Source: MDPI journal article supplement (doi:10.3390/biomimetics8070550), 2023-11-17
Supplement: s1 [file s1]

**Table S3.** List of functional annotation of Phytoplasma effectors

|                                                  |
|--------------------------------------------------|
| Tengu-su inducer                                 |
| SAP1-like protein                                |
| SAP02-like protein                               |
| SAP05-like protein                               |
| SAP06-like protein                               |
| SAP08-like protein                               |
| SAP09-like protein                               |
| SAP11 effector protein                           |
| SAP19-like protein                               |
| SAP20-like protein                               |
| SAP21-like protein                               |
| SAP30-like protein                               |
| SAP34-like protein                               |
| SAP36-like protein                               |
| SAP37-like protein                               |
| SAP39-like protein                               |
| SAP40-like protein                               |
| SAP42-like protein                               |
| SAP43-like protein                               |
| SAP44-like protein                               |
| SAP45-like protein                               |
| SAP48-like protein                               |
| SAP49-like protein                               |
| SAP50-like protein                               |
| SAP53-like protein                               |
| SAP54-like protein                               |
| SAP55-like protein                               |
| SAP56-like protein                               |
| SAP59-like protein                               |
| SAP61-like protein                               |
| SAP63-like protein                               |
| SAP64-like protein                               |
| SAP65-like protein                               |
| SAP66-like protein                               |
| SAP67-like protein                               |
| SAP68-like protein                               |
| phytoplasma effector causing phyllody symptoms   |
| Secreted effector protein containing SVM protein |
| Effector causing phyllody symptoms 1 (Phyl-1)    |
| SVM family protein                               |
| Effector protein/putative effector               |
| Putative phage integrase                         |
| MPEP-jgl1_1                                      |
| PME2-sporadic                                    |
| PME2ST                                           |
| antigenic membrane protein (Amp)                 |

|                                                                                                                                                                                                                                                                                                                       |
|-----------------------------------------------------------------------------------------------------------------------------------------------------------------------------------------------------------------------------------------------------------------------------------------------------------------------|
| Immunodominant membrane protein A (idpA)<br>Immunodominant membrane protein (Imp)<br>Variable membrane protein A (VmpA)<br>Secreted AYWB protein (SAP)<br>type III secretion system effector protein Candidatus<br>Conserved hypothetical protein*<br>Uncharacterized protein*<br>Hypothetical proteins*<br>No hits** |
|-----------------------------------------------------------------------------------------------------------------------------------------------------------------------------------------------------------------------------------------------------------------------------------------------------------------------|

Most descriptions were found both in UNIPROT and GenBank.

Labeled with (\*) were found as common description at GenBank in Blastp analysis using an amino acid sequence of a phytoplasma effector as query.

\*\* No hits, which corresponds to specific proteins in the analysis of phytoplasma genomes in the literature.
