# Supplementary material for: PhyEffector, the First Algorithm That Identifies Classical and Non-Classical Effectors in Phytoplasmas
Source: Biomimetics (Basel). 2023 Nov 17;8(7):550. doi: 10.3390/biomimetics8070550 (PMC10669590; doi:10.3390/biomimetics8070550)
Supplement: Supplementary file 1 [file biomimetics-08-00550-s001.zip]

Archive with 5 entries (5 files):
- Table S1.xlsx
- Table S2.xlsx
- Table S3.pdf
- Table S4.xlsx
- Table S5.xlsx
