# Supplementary material for: PhyEffector, the First Algorithm That Identifies Classical and Non-Classical Effectors in Phytoplasmas
Source: Biomimetics (Basel). 2023 Nov 17;8(7):550. doi: 10.3390/biomimetics8070550 (PMC10669590; doi:10.3390/biomimetics8070550)
Supplement: Supplementary file 1 [file biomimetics-08-00550-s001.zip › Table S1.xlsx]

## Sheet: Positive dataset (64)
ID UNIPROT	Sequence	Organism	%Identity	Length	Asparagine (N)	Lisine (K)	Leucine (L)	Serine (S)	Cisteine (C)	Triptophane (W)	Type protein
A0A3G3BKE3	MQNKNVQKSLITKLTTLFAVIALSLGLVVSSSVFADSGKKDLSTLIDTEKKVTLKADDAADKAKVVAELKKVDSLKEITESDIDSVALSADKSKITVKAKADSSKVSGQVDLTRVDPSSDAAKAAAEKWYAKWWVWALVAAVVATIIGVSYYVVKKRQQK	Candidatus Phytoplasma meliae	0.5333	160	2	24	14	18	0	4	Amp
A0A3G3BKC3	MQNKNVQKSLITKLTTLFAVIALSLGLVVSSSVFADSGKKDLSTLNDTEKKVTLKADDAADKAKVVAELKKVDSLKEITESDIDSVALSADKSKITVKAKADSSKVSGQVDLTRVDPSSDAAKAAAEKWYAKWWVWALVAAVVATIIGVSYYVVKKRQQK	Candidatus Phytoplasma meliae	0.5333	160	3	24	14	18	0	4	Amp
A0A851HI12	MASLLLVLVGNSYKVFADPQPVNLDSVLTVKDLGPVECDDTENPKPAEVLAAVVAKNANVKSAEVTVTVDTTNKKTNATVAVNSGSQVYNTGSVNVTYTTKVKTADKNSNPWYKSVWFWLLVLVVVGGASYGTYYVVSKNKKTKNKK	Candidatus Phytoplasma pruni	0.5	147	14	17	11	11	1	3	Amp
Q1MXC6	MQNQKNQKYLVSKVIVLFAAVFLMFVGVQVFAADAATNLGSLQAPKQPLTFTSDEEAGKLPSVVQALKVLKADQNLINILTEANVDVSTDSTDTNSKKVIIKAKAAKSDVVTGELSLNYVVGADKGVAAATPFYKSWWFLTLLVVTVVAVASGVVFFVKKNKKN	Potato purple top phytoplasma	0.5965	164	10	18	16	11	0	2	Amp
A0A3G3BKC1	MFSQNKNYLSKFLQLTGIFSVFLLIFFSHNKVFGAGENTPPIKEQISTIKNKDQQKADIKTKAEALLQEISNFETKIKTIFTTANIEELKQIFDDAAWNSLSTEITNKLAIRTILQEDKTILENMQKLVQKIKEQKQTYSSDVLILSKAGEKILEEVKTAFLKIMDQTKLLETNMKNLETENQKLTANKLNDTIINNLRNKINNFLTKSRSSELEAAKTQLTKIETDYQKLKESETASTRDKKVAEEKDEKTNQGTGTANGDVKKVAEALKTATATTKSTTKSDDKDKGINTFQIIIIGVFIAIMISVIIVWILQQIKKPQSKR	Candidatus Phytoplasma sp	0.7226	324	23	46	29	20	0	2	idpa
F8QQ90	MFSQNKNYLSKFLQLTGILSVFILIFFSHNKVFGMTGDGEKTPSIQEQILKIKNKDQQKDDIKGKADALLQEISNFETAIQNIFTTAIIEELKQLLKDVDCDSLLTEISNKLAINTILQDDKQILEDMQQSVTKIKEQKQNYLNDVSVLSKAGEKTLEEVKTAFNNIIGQNQLLETNMRGLENQQTKLTAANKLSDTNISNLRKKINNFLNKSTSSKLEVKKTQLTKIETDYQNLNKAETSKTSDQKTAETTDKNSNKDSETANEDIKKGAETPKKAAKTTKSTTKTDDKEKNINTFQIIIIGVFIAIMISVIIVWILQQIKKPQSKR	Poinsettia branch-inducing phytoplasma	1	328	28	46	30	23	1	1	idpa
A0A7U0TEF4	MQQKENFLKTKKGKIVVGSVGSVVGVLVLYLIVAYIISMWPFAAKITEKDLATFKTDVEKLVADEKAGSKTENDTTAKKVEERIEEVKKLVDKVNEKRASDKKIDTKKIEDLKTEAGKLKDKEKEAFKTVAAEFKTKVGSFVTSFKEDIKEK	Alder yellows phytoplasma	0.6	152	3	32	9	7	0	1	imp
A0A2D0Y119	ILAWSMSFWPFSKSKQKIFTDDLQKITFSTDSEEANNIFNKTGSDRKKQLDEFIDKKVKKFITFADQLTDPKITEGDKKTSFDLAIESLTKIKSNKESLVGHDEAYLKVDTNKTTVQGEIKIIVDECIKFKTQIKTALNLE	Candidatus Phytoplasma pyri	0.617	141	6	23	10	11	1	2	imp
A0A2D0XTE4	ILAWSMSFWPFSKSKQKIFTDDLQKITFSTDSEEANNIFNQTTGSDRKKQLDEFIDKKVKKFITFADQLTDPKITEGDKKTSFDLAIESLTKIKNNKNLLVGHDEAYLKVDTNKTTVQGEIKIIVDEYIKFKTQIKTALNLE	Candidatus Phytoplasma pyri	0.6197	142	8	22	11	9	0	2	imp
A0A2D0XP51	ILAWSMSFWPFSKSKQKIFTDDLQKITFSTDSEETNNIFSKTESDRKKQLKDEFIDKKVEKFITFADQLTDPKITEGDKKTSFDLAIESLKKIKSNRDLLVGHDEAYLKVDANKTTVQGEIKIIIDECTKFKTQIKTALNLE	Candidatus Phytoplasma pyri	0.6479	142	5	23	11	11	1	2	imp
WP_161554967.1	MKNNNQKQKKYFYVDFEVTTGQYLTLRIPKDGDGNQNGSNNDRANKKTNIKK	Candidatus Phytoplasma ziziphi	0.17	52	9	9	2	1	0	0	ncSecP3
WP_121463838.1	MDFDLGSQKRLAEALRRAHARGVKWLTTNYPTQEILQFYQGFNFNYMLATTNVKKKKKY	Candidatus Phytoplasma ziziphi	0.17	59	4	7	6	1	0	1	ncSecP9
A0A7G1G7U3	MFKLKKHLLLFKIVLFLVLGLFLITNNNQVMAMDKDIPSTSNKHQNNDNSTIEEIIINLKDQIRENAVKKINTEKELNTLSNNDLRRNNLLVLKRRLTDLINNQKEQLKTYQILLKNLND	Candidatus Phytoplasma fragariae	0.6429	120	19	14	22	4	0	0	Phyll1
A0A7G1GDX1	MFKLKKQLYLFKIILFICLGLFLITNNSVMAMDKDIPSTSNKHQNNDNSTIEEIIINLKDQIRENAVKKINTEKELNTLSNNDLRRNNLLALKQRLTDLINNQKEQLKTYQILLKNLND	Mulberry dwarf phytoplasma	0.6905	119	18	14	20	5	1	0	Phyll1
A0A7G1G829	MFKLKKQLYLFKIILFICLGLFLITNNSVMAMDKDIPSTSKKHQNNDNSTIEEIIINLKDQIRENAVKKINTEKELNTLSNNDLRRNNLLALKQRLTDLINNQKEQLKTYQILLKNLND	Porcelain vine witches'-broom phytoplasma	0.6905	119	17	15	20	5	1	0	Phyll1
A0A5J6ED47	MFQFKKNLFFLKISLLTFLGFFLILNINIMATKNDPTKSKIDMKNKSLSIEDKGKKIIQNSNLRNNRKLPVLIDFFSTNDELPKNKSLSIEDKGKKIIQNKEQPLTNADILKILIDNENTTPEDIEKLTYHFKKNPKLRNDKAMQRVINYCFVMDKLPLKDFDLACFKPQQ	Apple proliferation phytoplasma	1	171	18	27	21	8	2	0	pme
A0A5J6EFI7	MFQFKKNLFFLKISLLTFLGFFLILNINIMATKNDPTKSKIDMKNKSLSIEDKGKKIIQNSNLRNNRKLPVLIDFFSTNDELPKNKSLSIEDKGKKIIQNSNLRNNSQLPVLNNFFSTNDELPKNKSLSIEDKGKKIIQNKEQPLTNADILKILIDNENTTPEDIEKLTYHFKKNPKLRNDKAMQRVINYCFVMDKLPLKDFDLACFKPQQ	Apple proliferation phytoplasma	0.8104	211	26	32	26	13	2	0	pme
A0A0P7KD01	MKIYNPNNIIMAAPSQEEIIQGTRIVNVTVSNINVLKTHPSFAQYFDFNQTCPCYNSTVAEFCIMWKIKNPPTNLLGVFFDESTRDDEDDKYSLEELKYMANNSVNMFIFWEHKEK	'Echinacea purpurea' witches'-broom phytoplasma	0.6455	116	13	8	5	7	3	2	SAP05-like
A0A0L0MJZ3	MFKIKNNLLLLNIFVLVFLGLLLINNNQKVMAAPNEEFVGDMRIVNVTVSNMDILKNHETFKQYFDFTLTGPRYNGNIAEFAIMWKIKNPPRYLLGVFFDNGTRDDEDDKYMLEELKQMGNGAKNMYIFWQAI	Candidatus Phytoplasma phoenicium	0.7023	133	16	10	15	1	0	2	SAP05-like
A0A531Y329	MFKFQHNLLFLNIFIFILLGFFLITNNNQVIAAPHEERVGDMRIVNITFSDINSIKNFQPFSQYFDFTLTGPRYNGNIAQFAMIWKIKNPPHNLLGVFFDNNTRDDEDDKYTLEELKQMGNGAKNMYIFWQYEQK	Periwinkle leaf yellowing phytoplasma	0.6222	135	16	8	11	3	0	2	SAP05-like
A0A859I930	MFKIKNNLLLLNAFFVFIFLGLFLIINNQQVMAAPNEEFVGDMRIVNTTVSNIDILKNHETFKQYFDFTLTGPRYNGNTEEFAIIWKIKNPPRNLLGVFFDNSTRDDEDDKYTLEELKQMGNGAKNMYIFWQYE	Rapeseed phyllody phytoplasma	0.6791	134	16	9	13	2	0	2	SAP05-like
A0A975FJD4	MIKLEKQLSLFSLFFIIFLGLLMFDNNMLYASPGINLDVRMRQLTEEQNNLIQQLNNNFNDLSLNNTIRLSRMQNIAADIERISNQINAINQQLILRDQFQRERETRNNTSNQQNNNNNGRH	Loofah witches'-broom phytoplasma	0.4151	122	23	2	17	7	0	0	SAP06/SAP48-like
A0A859I9N5	MNLNFKNINYTSIFLFIIFLFFIFINYFIKSNLVYAGQVYSEIKKTDSSEQLFDSSETKIEFLRSKIDDLSRKRNSILKEINRIEETLSFHLKIRSKKNPNASERNSSFLKFQISFLKEKKSSLKKKLYEINLEQIDLEIQLRKNIYSLKK	Rapeseed phyllody phytoplasma	0.5902	151	13	21	18	19	0	0	SAP08-like
A0A975FJ78	MKTQNKNKILIIITFVIVLFFSIISIYALNDYFNKQRKEKINLINDFPIFTVERTGGNNENQILLPISIPNLNQKKYNHLITIEHEAILNSNGIDISIPLYLKLSTQYNTNQSFNNPEKYLNISLKVNNNDYDDTKRPQMILNDKGIGIIKIQISIEQKEIINSKNPQLELICDYELVDSQGKSFEGGNQTIENKIAQLAK	Loofah witches'-broom phytoplasma	0.757	201	27	19	19	12	1	0	SAP09/SAP39-like
A0A975INP5	MKTQNKNKILIIITFVIVLFFSIISIYALNDYFNKQRKEKINLINDFPIFTVERTGGNNENQILLPISIPNLSQKKYNHLITIEHEAILNSNGIDISIPLYLKLSTQYNTNQSFNNPEKYLNISLKVNNNDYDDTKRPQMILNDKGIGIIKIQISIEQKEIINSKNPQLELICDYELVDSQGKSFEGGNQTIENKIAQLAK	Loofah witches'-broom phytoplasma	0.757	201	26	19	19	13	1	0	SAP09/SAP39-like
A0A1Q1NHA7	MQVKNKLHLLPFFLISYLGLFFLININHVMAAPKKNDKGKEISSSEKEEKITKKDISQYYELYNTLKDYSEEDQNKIIQILSDPEISKLLQEQKLKSQKTGSSSKKPDDSKK	'Citrus aurantiifolia' phytoplasma	0.4167	112	6	20	13	13	0	0	SAP11
A0A1Q1NH89	MQIKNKLYFLPLFLMSFLGLFLLININPVIAAPEKNDKGKKIASSEKQEKTTKKDISQYYELYNTLENYSEEDRNKIIQMLSDSQTLKILQEEALKSKKKGSSSKKPDDSKK	'Solanum lycopersicum' phytoplasma	0.3958	112	7	20	14	12	0	0	SAP11
A0A4Y5R0G3	MQIKNKLYFLPLFLMSFLGLFLLININAVIAAPEKNDKGKKIASSEKQEKTTKKDISQYYELYNTLENYSEEDRNKIIQMLSDSQTLKILQEEALKSKKKGSSSKKPDDSKK	Candidatus Phytoplasma aurantifolia	0.3958	112	7	20	14	12	0	0	SAP11
A0A0U2D622	MFKFKSQIKLIYICLFIILGLFFIINNNYVMASPPKKDSNKGKSIDKSVSSKRETVSIREYRELEMALNQLPEEERNTIMETLNNPEKMEVLLKKAQDEANKKRGGSSSSQHDDNNKDKGKK	Apple proliferation phytoplasma	0.3684	122	11	18	10	12	1	0	SAP11-like
A0A0L0MK48	MFKLKKYLLIFNIILFIGLGLFLITNNVHQVMAAPKKDHGKDIIPSKEESKKDVRNYYELYNTLENYSEEDRNKIIQMLSNPEITKILEDKAKEIKNQEKASSSTKPNKKKK	Candidatus Phytoplasma phoenicium	0.3958	112	10	20	11	7	0	0	SAP11-like
A0A421NZ11	MFKIKNNLLFLNVFLFIGLSLFLITNNNSIMATPKKNHGKDIISSKEEAKKDVKNFYELYNTLENYSEEDRSKIIQMLSNPEIIKKLKEKIEEEKKQEKGSSSRQPDNCHK	Candidatus Phytoplasma solani	0.3684	111	12	18	11	10	1	0	SAP11-like
A0A1V0PKT7	MMQIKNKLYFLPLFLMSFLGLFLLININPVIAAPEKNDKGKKIASSQKKEKTTKKDISQYYELYNTLENYSEENRNKIIKMLSDPKTLKTLQEKALKSKKKGSSSKKPDDSKK	Faba bean phyllody phytoplasma	0.3784	113	8	24	14	11	0	0	SAP11-like
A0A975IND1	MVKSKKQLSIFTSILFICLGLFLITNNQIYGSPKKDISSLKEIEKQDIKNYFDLYNTLENCSNEERNIIIQILSNSKTVDLLKQMAKEEAKNKPTNKEEGSSSQQPDSSKK	Loofah witches'-broom phytoplasma	0.4286	111	10	16	11	14	2	0	SAP11-like
A0A975FJX5	MVKSKKQLSIFTSILFICLGLFLITNNQIYGSPKKDISSSKEIEKQDIKNYFDLYNTLENCSNEERNIIIQILSNSKTVDLLKQMAKEEAKNKPTNKEEGSSSQQPDSSKK	Loofah witches'-broom phytoplasma	0.4286	111	10	16	10	15	2	0	SAP11-like
A0A531Y154	MFKFQHNLLFLNILLFIVLEMFLITNYFHQVMAAPKKHGKDIISSKEEVKDNVKKYYELYNTLENYSEKERNKIIQMLSDPAIIKTLEEKIKETKTHEKGSSYKKPDNLKK	Periwinkle leaf yellowing phytoplasma	0.3438	111	8	19	12	6	0	0	SAP11-like
A0A975FIG9	MIKLEKQLSLFSLFFIICLGLLFIVDNKQVMGMNNNPSQNNSNGDNNIDEYRIFQNLLSIQERTIQQIINALRNHNSEVEINTLLNQSEQIHQQIITHQQRQLNNQHQFMINFERNITKIQLEREHLSLIQEMNTAINNIPIYASTEQINVLRNIQIRMDQNRRQINIIIQQLQNNPNPPNNNRRR	Loofah witches'-broom phytoplasma	0.5679	186	32	4	18	9	1	0	SAP19/SAP40-like
A0A531XZZ7	MIKLQNQFKIISIYLFTFLGLLFITNNYQVMAMDNNDGISENNSVVDNHIDEYNTFRNLLLTQGRISQQLINALFNHSSVTEINFLLNQIQQVHQQIITYQQRQLNNQEQMLRNFDNNMTIVQLEREYLLLTQEMISAINNTPLYASEEQINTLRNIQTRIDQNQRQINIIRNQIQNNQNQPNNHRRR	Periwinkle leaf yellowing phytoplasma	0.8449	188	31	2	20	8	0	0	SAP19-like
A0A859I959	MIKLQKKIKIIYLCLITFIGILFILNDNQVMAMNNNPSSNINNEIIINNMEEFQNLMLLQRNSVQQIINALSNHALEPEILNLLNGHNQIHGQIVNYQQRLLNIQQQMIRNFDNNMTRIQLESECLSLENSMMIAIDETPLHASESQINVLRNIQINIDQKQAQIQNIIQQIRQQQRNNNPNNRRRC	Rapeseed phyllody phytoplasma	0.5229	187	32	5	20	9	3	0	SAP19-like
A0A859I965	MLIFRLKKQLYLLPIALFIYLGLFLFTNHHQVMAMDNKKHYIKNKKTSTDIKKELFNLLTNKKELEDKIHYFRNKKQVNLYERDIVLKLEIEHNELKSKISEIYKNNSKMSKVTFNLKPLIKIIED	Rapeseed phyllody phytoplasma	0.4878	126	11	22	19	5	0	0	SAP21-like
A0A531Y0Y5	MVKIKHHLLFLNIFVFIGLSLFFITTNNSVMAMENNTYNTYKGEQKKDNDILDEAIENLDEAIKYFNKKGIQINLDKITKLLSKNETKIKKRNITLEEQNLFISKKPNKNKK	Periwinkle leaf yellowing phytoplasma	0.4842	112	15	19	12	4	0	0	SAP30-like
A0A531Y098	MIKLQKKIQIIYLCLITFIGILFILNDNQVMAMNNLNDENTINKEINKLYLERKELTKQIKYFDIYHLDDNIKLQKQLHNLDQTIKNLYQRLSDIKLLKYINEQIWNYSYERNQIANTILSRSYQDPTIQELIANHQKLVKKINNLSQKYINLQFKLNEFN	Periwinkle leaf yellowing phytoplasma	0.6957	161	21	18	23	5	1	1	SAP42-like
A0A859IAT1	MVKIKHHLLFLNIFLFIVLGLFLITNHYQVMAANDLNDEYSINNEINKLCSEKNLLAIKISYLQKYDLETKIYQKKLNILNQKIQNLSQRLSNIKVLNFTNEKIWDYSYERNQVVIKSFEHPEIQEFREDHRKLIEKINNLQQKYINLKYKLDE	Rapeseed phyllody phytoplasma	0.5157	154	18	18	22	7	1	1	SAP42-like
A0A859IB38	MFQLQNQFKIISFCLFIFLGLFLITNNSVMAMNNLNDENSINNEINKLYWERKNLATKISYFHIHHLDDDINLQKELHNLDQTIKNLYQRLSDVNNLKYINEKIWDYSYERNQVAIKILSRSYQDPTMQELITNHQELVKIIKNLNQKYINLQYKLNK	Rapeseed phyllody phytoplasma	0.7421	158	23	14	21	8	1	2	SAP42-like
A0A859IAG2	MTMKSLINFNQFKKKIFLILFFLLFFNFIYNKKNFVMAMETKQNSNSKSVIHFNLDDELQESEIFQFNNAFSDMDVLNKTLKKFKIKLNNELNINSLREIKEKFNGFRINFFIKLNFLWYIYSNNENHAHILYTNYASDVDNIGNLVLIPSFQRNHYISLNEKIKLIGDTFMIQNNDRIEIYRNSFDTKNQRENTLEYLNPIYSDNLFQIFLDFDIKEEHDGLYMYFDLYKHGFTELNNYCFKIDFSLDRKIDFIKNIN	Rapeseed phyllody phytoplasma	0.3544	259	37	24	27	14	1	1	SAP43-like
A0A531Y0U5	MFKLQNQFKIISIYLFIFLELFLINNSNQVMAMENKKICNLNMKIHNIWIQKKEDIVSHVINKNIDQTFSYLTLDYPCYNSATNNKNDLCWRIKEPPNNLLFVFFDNGIRSNEDEFYSLEDLNKMGNGAKNMYIFWLTKTLYPQIKTEKDIINKEIFYQLKIKLKNIEIEKLNIELNLFKEIKLQLEKEIDNQTNIYLNTKKIILNLENYINNLEGINKKNQNINLENEKLKQKLNLNYIELQKEKEKFLNQKNNINKLQQELNQKTTTYMGIFNSLYKKIF	Periwinkle leaf yellowing phytoplasma	0.3902	282	45	38	35	8	3	3	SAP49-like
A0A859IA30	MLNLKNQFSRINLFFISLGLLFLVNHHPVMAIENKKICNLNMKIHNIWIQKKEDIVSHVINKNIDQIFSYLTLDYPCYNSSTNNKNDLCWRIKEPPNNLLFVFFDSGIRSNEDEFYSLEDLNEMGNGAKNMYIFWLTKTLYPQIKTQKDIINKEIFYQLKIKLKNIEIEKLNIELNLFKEIKLQLEKEIDNQTNIYLNTKKIILNLENYINNLEEINKKNQNINLENEKLKQQLNLKYIELQKEKEKFLNQQNNINKLQQELNQKTTTYMGIFNSLYKKIF	Rapeseed phyllody phytoplasma	0.3939	281	43	35	37	10	3	3	SAP49-like
A0A859IC30	MFNIIKKIIKWFFIILGLLLCLLIGFFFLTEMNIIKLPELPKKEIPSIKETKADIKEEWEEIDHRGRTQSMIEIHYTFDGLNGIGYYEQQKLKAEQLFRERESLEKQAKEKNLQIYLNDKTIDMNRSPNNPELDNLSEKIMKNHNELIKINQKLILDRLETQKEPSNLACYIKDRHPFDRWNNKGLTYKETSINGFKFSRFDKEDDSQLYLYVKLEKQFKENSNGNCLILKYQGPKHFLDDDKDYYLGRARVSDSNFELTNFHLHFNPVRKTLSIFKDKHNNDKVEEAEMNKNHPNGW	Rapeseed phyllody phytoplasma	0.5604	298	27	36	33	13	3	4	SAP53-like
A0A859I9C2	MFNIIKKIIKCFFIILGLLLCLLIGFFFLTSDTDKLPKEQIPILKETAFEKFDEWYDDNKKCQMIKAKYTFDGLNGIGYYQQQLQEKKGSHNDISISQDRLETQKEPSNLANYIKDRHPFDRWNNKGLTYKQTSVNEFEYSSFDTEIDSQLNIYIKLEKQFKENSSGNFLILKYEGPKDLIEKDKDYYLGRAHVSNSNFELTNFNLHFNPVRKTLSLYQDKHNNDKVKEATYNKRTSSDL	Rapeseed phyllody phytoplasma	0.594	240	20	29	25	16	3	2	SAP53-like
A0A859I9G1	MFNIKKIIKWFFIILGILLFLFIGFIVLTEMEIIKLPKEEIPILKENKADIKDEWEVTDHRGRTKSMIEIHYTFDGLNGIGYYEQQKLKAEQLFRERESLEKQAKEKNLQIYLNDKAIDMNRSPNNPELDNLSEKIMKNHNELIKINQKLILDRLKTQKEPSNLVCYIKDRHPFDRWNKRGLTYDRTTLDGFDSASFDKKDDSQLYLYVKFEKQQHKGPGGNCLIVKYKGPKHFLEDDKDYYLGEVFVHDSDFKLTHFHLHFNPKRKTLSLYQDKHNNDKVKEAENNKRTSDDW	Rapeseed phyllody phytoplasma	0.609	294	20	39	31	11	2	4	SAP53-like
A0A859I8L6	MFNIKKIIKWFFIILGILLFLIIVFIILTDPNKLPKEKIPILNEPKKETHEEWYDDNKKCQMIKAKYTFDGLNGIGYYQQQLQEKKGSHNDISIAKERLENQKEPSNLANYIKDRHPFDRWNKRGLTYEETSINGFKFSRFDTEDDSQLYLYVRLEKQFKENSSGNCLILKYKGPKNLIDEDKDYYLGRAWLENSEFNNENFHLHFNPVRKTLSLYQDKHNNDKSKEAPYNKRTSDDW	Rapeseed phyllody phytoplasma	0.6325	238	22	30	23	12	2	5	SAP53-like
A0A859I8U8	MFNIKKIIKWFFIILGVLLFLLIGFFVLTEMNIIKLPELPKKEISSIKETNFENIEEWYDNNNKCTMIKAKYTFDGLNGIGYYEKQLQEKKGSHNDISIAQKRLEKQKEPSNLANYIKDRYPFDRWNNKGLTYEETSVNGFEHAQFDTKHDSYLHYYINFEKQFKENSSGNCLILKYKGPKQFLDKDKDYYIGRARVSNSNFKLTDFHLHFNPVRKTLSIYQDKHNNDKVQEAENNKRTIPDW	Rapeseed phyllody phytoplasma	0.6478	243	24	31	20	12	2	4	SAP53-like
A0A859IA89	MIKIKKIIKWFFIILGVFLFLLIGWIVLTEMEIIKLSKEEIPILKETKADIKDEWEETDHRGRTQSMIEIHYTFDGLNGVGYYQQQLANKDKISSFQLMTVQDRLENQKEPSNLVCYIKDRHPFDRWNKNGDTYNHTTLDGFDDASFDKKDDSQLYLYLKFEKQQHKGPGGNCLIVKYKGPKHFLEDDKDYYLGDAFVDDANFKLTHFHLHFNPKRKTLSLYQDKHNNDKVQEAENNKRTSDDW	Rapeseed phyllody phytoplasma	0.75	244	14	29	23	9	2	5	SAP53-like
A0A385GMC4	MFRSKNQFKIIHLCLIAFIGLLFIFNNHQLMAMNNNEAGPSNNPSIEEMIIDTKNKIRDNANKKVNIEKEISQERNNQNNLQKIENLTQISNNLTLLIKNQKEQLKTYRKLLNTLND	Candidatus Phytoplasma sp	0.4309	117	22	12	14	5	1	0	SAP54-like
A0A975FJ37	MLIKNKLHLLPFFLMSCLGLFILITINPVMAMDPNLPGTSSNQPAHQNFTIEENIINLKQKIYYNATKITNIDKALQGSITDDDKTNLLKLKENHKRLIDNQKEQLKTYKNLLKNLNDEDN	Loofah witches'-broom phytoplasma	0.7983	121	16	14	19	4	1	0	SAP54-like
A0A531Y2Y1	MFKLKKHLLLFNIILFIILGLFLINNSNQVRAMEGLFHEEIQEITETESEENEEITHNISKTNIISKEKFVSLHEIGHAVVAFELSQRHREYPNLIKLKGIELKQDDETIDGSTDFSFDRDNLFGHLFALSVYYGGLEAEKTIKTPIEEIKNRGQHDEQDIEKTAQYITERGWFLGDFYLSTDSLEIRKNKIKNIAQTKTQEIIQQYQEFLSPLADELLQREVIGIEEFQKLLKELIIQRKPSQKPEQLETIEKSNYNHKKTKCDCVIL	Periwinkle leaf yellowing phytoplasma	0.4081	269	14	25	30	14	2	1	SAP55-like
A0A859IAC1	MFKLKNQFKIISICLFVLLGFFLIFNTKCLYAFPGITLETQKIRLEERKNELKSQEIVLSREPRNNANIERLCHVRTEIVKINMEIYMIMQQIQMRDIIQQPQTQETQNIQRPIE	Rapeseed phyllody phytoplasma	0.84	115	8	8	11	3	3	0	SAP56-like
A0A531Y0P6	MFKLQNQFKIIRVFLFTFLGFLIINNNQVMAMGNKNSNNNSEISNDKEYALYIQAEIAIKSELTNLQLNNAKKSELLHKQQFITTEIEKYNKRQNNNQLSTTYGEQPESSRRNISSAINDDDENELSDDELQPMNLIKNNSKCPIDQPESSKKNIIKNKKEI	Periwinkle leaf yellowing phytoplasma	0.5497	162	25	17	14	14	1	0	SAP67-like
A0A531Y097	MFKMKNHLLFLNIFVFFGLGLFLITSNNYIMAMGNKNSNNNEISNDEEYALYVQAEFSIQNELTNFKFNNEKKSELLYKQTCITKAIQKYNKRKNNHHLSTPYDNQPESSKKNDSKNKGVVIND	Periwinkle leaf yellowing phytoplasma	0.5575	124	21	15	11	9	1	0	SAP67-like
A0A859IA66	MFKLQNQFKIINICLLVFLGLLFINNNYQVMAMGNKNSSNNSEISNDKEYALYVKAELAIQSELTILKLNNEKKSELSHKQKCITTEINKYNKRKNNNRLSEQPESSRQNISSAINDDENELSDDELQPMNLMKRNYKCPIDKSESSKKNDYKK	Rapeseed phyllody phytoplasma	0.5696	154	23	20	16	16	3	0	SAP67-like
A0A531Y090	MFKLKNQFNIIYLCLINFIGILFILNNPLMAMHNGNETPNNAHHNTNFETQARILQEMNREQAVIVQQIFNARKNNASEEIINNLVRQNIQLSQRISTQQIILHNAMPHENNRNQLNNSNNRRR	Periwinkle leaf yellowing phytoplasma	0.5	124	26	3	11	4	1	0	SAP68-like
A0A081D5D9	NYLIFADQDDDIENVITLIETKENQTEQIKIQCQDLLQKGEKDA	'Chrysanthemum coronarium' phytoplasma	1	44	3	4	4	0	1	0	tengu
F8UVK4	MVKLKKNKAKLLIFAGFWAILLFLNHNYLVFADQDDDIENMITLIETKENQTEEIKTQCQDLLQKGEKDA	Candidatus Phytoplasma tritici	0.9286	70	5	9	10	0	1	1	tengu
F4YY99	MVKLKKHKAKLLIFAGFWAILLFLNHNYLIFADQDDDIENVITLIETKENQTEQIKIQCQDLLQKGEKDA	Mulberry yellows witches'-broom phytoplasma	1	70	4	9	10	0	1	1	tengu
A0A531Y060	MVKLKKNKAKLLIFAGFLAILLFLNHNYLIFADQDDDIENVITLIETKENQTEQIKIQCQDLLQKGEKDA	Periwinkle leaf yellowing phytoplasma	0.9714	70	5	9	11	0	1	0	tengu
