# Supplementary material for: PhyEffector, the First Algorithm That Identifies Classical and Non-Classical Effectors in Phytoplasmas
Source: Biomimetics (Basel). 2023 Nov 17;8(7):550. doi: 10.3390/biomimetics8070550 (PMC10669590; doi:10.3390/biomimetics8070550)
Supplement: Supplementary file 1 [file biomimetics-08-00550-s001.zip › Table S2.xlsx]

## Sheet: Negative dataset (64)
ID GenBank	Sequence	Organism	Pathway	%Identity	Length	Asparagine (N)	Lisine (K)	Leucine (L)	Serine (S)	Cisteine (C)	Triptophane (W)	KO name
USQ93396	MSLNIKEEALKIHEKNKGKLEINTKIKINNLQELSLIYTPGVAEPCLEIAKNPKNAYKYTTKGNNVAVITNGTAVLGLGNIGALASIPVMEGKASLFKTFANIDSFPICIDSEDPEEIINIISKISPIFGGINLEDIKSPECFYIEKKLKEKLDIPVFHDDQHGTAIVVCAGILNALKIVKKNIKDVKIVITGAGSAGIAVAKMLLLLEFKNIILIDKEGAIKKDCTWLNEEQKKMSLVTNLKNETGSLKEIIQNKDIFIGLSKPNILTSEMVSTMAPNSIVFALANPIPEIMYDEAKKGNAKIVATGRSDFPNQINNLLAFPGIFRGALDSQATQITEEMKIAAVYALTSIIPEKELNENNIIPSIFEKKVTQIISEAVAKVAIETNMTRK	Candidatus Phytoplasma vitis	02020 Two-component system	0	392	32	44	33	21	1	1	malate dehydrogenase (oxaloacetate-decarboxylating) [EC:1.1.1.38]
Q6YPX5	MLTNVYDPLKGKQFQILDENGNLVQPELEPKLSKDVLLKMYKTMVLGRQADLAALKYQRQGRMGNYLLNSGQEASQVGVAAALEPQDWVSPYYRDAGIFLYRGVSLEQFYLYWYGNEKGSQLDPKLRILPANIIIGSSVNLGAGLALASKMQNKKEVTIATIGDGGTAHEEFNAGLNYAAVFGVPLVVFIQNNQYSISNPRNKVSKAKTLAQKCYACGIPGMQVDGNDILAVYVAAQEAFNEARKGNGPTLIENVSYRLEAHSTNDNASVYRSKEEELEWRKKDPIVRFQKYLMNKGYLTQKQVEQFEKEAQEEVVLAHQKVEQTGNNIDIKDIFAYTYEKMTPQLEEQYEECKAFFNTKEGK	Onion yellows phytoplasma OY-M:	00010 Glycolysis / Gluconeogenesis	0	363	25	30	34	16	0	3	pyruvate dehydrogenase E1 component subunit alpha [EC:1.2.4.1]
WCA22254	MISLIVALDSNFLIGNDNKLPWHYPEDILFFKKKTLKKDVLMGSKTYYSLRNYYKKKTLPFRKIYIANSEINVNLSQIIEQKTFLIKNLILFLKKCYENKKDIIIIGGSQIYKQSLPLVQKMFITHILKRYKGNKFFPFFNYNDFNIIKKKISNELIFVTYLRK	Candidatus Phytoplasma oryzae	00790 Folate biosynthesis	0	164	14	26	19	9	1	1	dihydrofolate reductase [EC:1.5.1.3]
QYC31278	MKNYDVLVIGGGPGGYVAAIKAAQMGAKVALVEKHKLGGICLNYGCIPTKAYLKSAKMYKDIKRCADFGIKVQNGVSFDWSSILSRKNKIVAQLTTGISFLLKKNKIDFYHGFASVLSPCEVQVDTKLLHTQKLIIATGSTAFVPPIPGAQEGYQKGILKTSKELLQLESYPSKVTIVGGGVIGVEFATIFNSFSSEVTILERQDTILNGMDRDVVVAYTKKLQADGIQILTQVEVTKINDNQTTYTQKGNAKTITSDVILMAVGTKANLAGLEKLNLALNRNSVQTDNFCQTSIPGVYAIGDVNGKHMLAHVASHEGIVAVTHALEQKAHPINYDRVPACIYGFPEIASIGMTEQEAKEKQMDYKVSKISLGAVGKSLADGEKEGFAKLIVCKKHLEI…	Paulownia witches'-broom phytoplasma	00020 Citrate cycle (TCA cycle)	0.6245	457	18	41	41	26	0	1	dihydrolipoyl dehydrogenase [EC:1.8.1.4]
WAN63335	MKKYDILIIGGGPGGYTSAIKAAQLGAKVCLIEKHKVGGICLNYGCIPTKAFLKSAKVFDIAKNIDQFGINKIDNISFDWISVLNRKNKIVKQLYNGILFLLKKNKIDFYNSSAEVLTPNLVQVGEIKLETDKLIIATGSSAIIPPIPGAKESYENKHLCTSKELVQLEKFPKKVIIIGGGVIGVEFATIFKKFNSEIIIIEKQKNILVNIDHDIINAYTKILKRDNIKIYTNSEVIKIENNKVYYKTNEQENQVEADIILMAVGTKPNLNGIEKLNLKKDRGGIITDNFLKTSVEGVYAIGDVNGKYMLAHVASHEGIIAVSHALNSKEHLFPMDYNSVPFCIYGFPEIASIGLTEEQVKANNINYKVSIFPVSSIGKSWADGETDGFAKLIVDKDSL…	Candidatus Phytoplasma rubi	00020 Citrate cycle (TCA cycle)	0.6245	459	34	50	36	26	1	2	dihydrolipoyl dehydrogenase [EC:1.8.1.4]
AOF54913	MNQKLGLKDQDQEIFDLIEQEKIRQKENILLIASENFVSQAVLDAQGSILTNKYAEGYPQARYYNGCKNVDQIEKIAIQRATKLFGAKYANVQPHSGSQANMGVFQALLKPGDKILGLSLMDGGHLTHGHKLSFSGGFYEAHFYNVNPQTEMLDYDEIRKVALKVKPKLIIAGYSAYSKTINFKKFRQIADEVNAYLMADIAHIAGLVACGLHPCPFEANADVVTSTMHKTLRGPRGGLILTNKEEVFKKINRGIFPGIQGGPCIHTIAAKAVAFQEAMMPSFKEYQKQVIKNANTFAKAFQQKGYRIVSGGTDNHLFLIDVKHKNTEFTGSKIANMLEKINIVVNKNTIPFDQEKPFVTSGIRIGTPAMTTVGFRENDFILVADLMDKAINHLDDESY…	Maize bushy stunt phytoplasma	00680 Methane metabolism	0.6299	415	26	38	34	17	0	0	glycine hydroxymethyltransferase [EC:2.1.2.1]
A0A421NY24	MKTKLSLEFQDQEIFDLIEAEKKRQKKDILLIASENFVSNAVLEAQGSILTNKYAEGYPNKRYYCGCQNVDQIENLAIQRVTQLFNVRYANVQPHSGSQANMAVFQALLQPHDKILGLSLNDGGHLTHGYKLSFSGINYDTYSYNVDKITEKLDYEAIRKLALKIKPKLIITGYSAYSKKINFKKFREIANEVNAYLMADIAHIAGLVACGLHPSPINQADVVTSTTHKTLRGPRGGLILTNKEELITKINRSVFPGIQGGPLMHVIAAKAVAFKEALSPAFKDYQQQVINNAQTFASSLQAKGYHIVSDGTDNHLFLINLKKKNPTLTGAKIAEALEKINIIVNKNTIPFDQENPTLTSGIRLGTPAMTTRGFKEKEFMQIAEWIDQVINHADDQVHL…	Candidatus Phytoplasma solani	00630 Glyoxylate and dicarboxylate metabolism	0.6294	418	30	38	40	22	1	1	glycine hydroxymethyltransferase [EC:2.1.2.1]
WAN63702	MDFLKNNYSEIFRIIREEEKRQEKHLELIASENFVSKSVLEAQGSVLTNKYAEGYPQKRYYGGCEYIDEIEQIAIEKVKKLFNVKFANVQPHSGSQANMAVFQSLLKPYDVILGMSLNDGGHLTHGHHVSFSGKFFYSYSYGVSSETETIDYQKLREIAHKVKPKLIIAGASSYSRIIDFKKFREIADEVGAYLMVDIAHIAGLIVAKLHPCPFLAKADVVTSTTHKTLRGPRGGIILSNNEEVMKKINKGVFPGIQGGPLMHVIAAKAVAFEEALQENFNIYQQQVLKNSLSLADVFVKLGHRLVSGKTENHLILIDLKYKYPNLNGKLASEVLQKANIIVNKNVIPFDKEKVFKTSGIRIGTPAMTTRGFQEKEFIEVAYLIDEILNNYQNEEVIEK…	Candidatus Phytoplasma rubi	00680 Methane metabolism	0.6299	419	26	42	37	25	1	0	glycine hydroxymethyltransferase [EC:2.1.2.1]
A0A660HLP5	MKKFSSESVTKGHPDKIADQISDALLDSFLKEDPESKVAIETVVTKQIVIVLGEIKTLFKFDSEYIENVIKNVVKEIGYNKESENFCYQKISILNFIHEQSRELTKIVKNKGAGDQGLMFGYATKETDLFLPLNFLLARNLSLRLTEVREKQILPFLRPDGKTQITLVYDENNNPLYIDSIVVSTQHEENIEQEFLKKNILKYVIEPIINPVLINEKTNFFINPSKSFVIGGPAADTGLTGRKIIQDAYGGEVRHGGGCFSGKDASKVDRSGAYMARYLAKNIVAAGLCDKCEIQLSYIISFDKPVSLFINTFGTNKVPENLILETIEQNFDLTPQGIIKILNLKKPLFQITSREGHFGHNDNLFSWEKIDQVPLFSKLLKEQN	Candidatus Phytoplasma ziziphi	00270 Cysteine and methionine metabolism	0	384	26	37	38	24	1	1	S-adenosylmethionine synthetase [EC:2.5.1.6]
R4S113	MPKEQQGFIEVICGPMFAGKTEALIKRYQEAQKLKKNILSFKPRIDNRYSSEGFIVSHSQNKFPAILIDQSRDILPFVTPETDLIIIDEVQFLDNDIFGIVDYLANQNIQIILAGLDLDFKGKPFGPMPYLLALAEVVTKLTAICAVSGKKATKTQRLINGKPAKSNDSTILVGGQEYHEPRCRRHHELLDVDKKTINL	Strawberry lethal yellows phytoplasma (CPA) NZSb11	00240 Pyrimidine metabolism	0	199	9	18	20	9	1	0	thymidine kinase [EC:2.7.1.21]
R4RXS7	MKLNQKGLLIVLSGPSGVGKATVRKALFEMKNHNFVYSISSTTRKPRLGEQEGKDYYFLTKEEFELGIKNNKFLEWAKFIDNYYGTSRKQVEDYLKEGKEVFLEIEVEGATQLRKKKFRNAVFIFLVPPEKKVLYERLKKRGTESADKIQQRIMKADKEFPLAHKYDYIVVNDDVFNAADRIIAIIRAEHAKTKRSIRNYLKILENDGYAEQ	Strawberry lethal yellows phytoplasma (CPA) NZSb11	00230 Purine metabolism	0	212	11	28	18	8	1	1	guanylate kinase [EC:2.7.4.8]
A0A421NYW9	MLKKVFETTDLKNPFQVEIGTYARNVDASVLVRFKDTVVLSATVFSDKKNNFDFLPLTVIYQEKFYAAGKIPGSFLRREGRSTDHEILASRLIDRSLRPLFPENFKQEIQVINTVLSSDPDFKSEIASILGSSLSLLISEIPFFEAVAGAYVARIQDQFILNPTFEQLNHSSLHLLVTGTKSNVVMIEAHANEVSEEIFLEAIEFGHQHIKILCLFQEQIQKEIGKTKKKVNHDSFDLTLETSFNEQYRTKIIEAILHLADQPKSNYLQLLKEQIFEQASKKNFFKTIEENTFIDLEAKKNYLQTIEILFQKLFKQEIRNLIIQDKKRPDKRGLEEIRNLESQIDLLPRTHGSALFTRGQTQSLAVVTLGSVSESKIIDGLNDEQNKRFMLHYNFPPFA…	Candidatus Phytoplasma solani	03018 RNA degradation	0	708	29	56	69	47	3	0	polyribonucleotide nucleotidyltransferase [EC:2.7.7.8]
Q2NIS6	MEVYMIKKRIITGGTLVLFSFFFYYCAPLEIKFLVFASLVIKAVQEMFFILNHPKDTQKQTFIKFGLVATSTLLFFTGVCLILYQNICQNNKLRNDFLLPFKSFLSYLKQPLFNYYFFLLLFLPFLLVLIMLVFLPFLQTKDVSKTFLITFYIGFLMACLFSLFFLHWHYFFLFVLSVMFTDSFAFLARFPCFCPFLGTSSLAPHLSPKKTQKGAILGTFGSTITVLIVFLFLKCDSCIRFSIYTFLISIISQISDLLASKFKRDYGIKDFGSFLPGHGGFLDRFDSWLLSSFFALILFNLPF	Aster yellows witches'-broom phytoplasma AYWB	00564 Glycerophospholipid metabolism	0	303	7	19	52	23	0	2	phosphatidate cytidylyltransferase [EC:2.7.7.41]
WBL31563	MTNKIDKHIEKLKKNPISVIVRTKKFEDAKKILKNTIENGFFFAEITLTIPNSFQLIYETKKKYNEIIIGAGTVLKLEEAKKAVEMGAEYLVSPIYNEKILKWSLENNILYIPGVMTVNEMYKVTKQGAKIFKLYPATFLSSETLKLIKQPFPNFNILATGGINLNNIKSYFDAGVLAVGITGILGGISEKINEEEIANLAKKYINISKQIIRERCD	Candidatus Phytoplasma sacchari	00030 Pentose phosphate pathway	0	217	18	29	19	9	1	1	2-dehydro-3-deoxyphosphogluconate aldolase / (4S)-4-hydroxy-2-oxoglutarate aldolase [EC:4.1.2.14 4.1.3.42]
WBL31562	MIYNEKKEIKKTNNNTINFCGSLESGDCLVSIEQNEEKKINLSISSPFIRQFGPRIKKISLKILKEQNINSCNLIIQDQGAIDEVIKSRIITVLNRMRKNKQKNNQKMI	Candidatus Phytoplasma sacchari	02020 Two-component system	0	109	14	15	7	9	1	0	citrate lyase subunit gamma (acyl carrier protein)
A0A421NXS9	MPYIESIIAREVLDSRGNPTVEVEVVTKSQAKGRSIVPSGASTGEHEAVELRDGDQRRFLGKGVQKAVANIKDIIFPKLEGLSVLEQILIDRSLVKLDGTPNKSKLGANAILGVSLTVARAAADFLGLEFYQYIGGIQPKQMPVPMMNIINGGAHASNSIDFQEFMILPIGAPSFREALRYGVEVFHHLAKILKSKGLPTTVGDEGGYAPDLGSNEEALQIILEAIKSAGFVPGKDIFLGMDVAASEFYDKETKKYVLASENNKSFSSEELVAYYESLVDKYPILSIEDGLDENDWDGWRVLTQKLGHKIQLVGDDLFVTNTQKLTQGIENNIANSILIKLNQIGTLTETLETIELAKKASYTAVISHRSGETEDTTIADLAVATNAGQIKTGSCSRTD…	Candidatus Phytoplasma solani	00680 Methane metabolism	0	430	20	31	44	29	1	2	enolase [EC:4.2.1.11]
B1VA75	MNNLKRIKVIAGNWKMYKDKNEALEFIQKVNFSIPNSKEVETIIFAQSTLLDVLVQNQGPNLKIGAQNAFHESEGAFTGEISPLNLVSLGVKYVLLGHSERRVLFGETDQLVNLKLLKALQNNLSPVLCLGETLETKENNKTKEFLEKQLTQALKDVPQEDLEKILIAYEPVWAIGTGKTASPQEANQTIKQIREKVTNLYSAQVVQSLKILYGGSVSSNNVEAILEQNEIDGVLVGKASLETKDFLNFTQAAVKLSSNCCQHFDKKC	Candidatus Phytoplasma australiense	00051 Fructose and mannose metabolism	0.444	268	22	26	34	17	1	2	triosephosphate isomerase (TIM) [EC:5.3.1.1]
WCA22582	MRKIIIAANWKMNKCKDEAIEFVFKINNKIPNRKNIETIIFPQITLLDSLTQIEGKNLRIGAQNVFYKNQGAYTGEISPQNIKSLGIKYVLLGHSERRIYFGENDNIVNLKLLSVLSHQISPIVCIGEISEEKNTKKKTEIFLNKQIEKILKNIQHKDIKNIILAYEPFWAIGKNNIKINPQKINKVIEKIRKKISILFSNQISEKIRIIYGGSISVTNAKYFLKEKEIDGILIGKNSLNFSHFLFFTKIAEKINKEKMKEKNLKKIATYKKGQGY	Candidatus Phytoplasma oryzae	00010 Glycolysis / Gluconeogenesis	0.5219	276	27	43	20	15	1	2	triosephosphate isomerase (TIM) [EC:5.3.1.1]
B3QZF7	MGLKLDLSGIKKFINFEKESQKLISKIKTIHQNMQNKRGVGKDFLGWLDLPFKVNSQEIIKINQIKSYYNLEVLIVIGAGGSYYGVKAGLDFLKFDFVSSNPQIIFAGYQISGFYLSNLIKYLKNKNWAINVISKSGNTIEPAIAFRILKQELEVKFGKKETKKRIFVTTSKNKGNLFKLALQEGYEVFDVPESVSGRFSVLSAVGFLPFIFANINIENILKGARDAFYDTSSCELSKNLSYQYAVSRFCLYQNKKHIELLVSYEPSLISFTDWWKQLFGESEGKNGKSLFPCGLYATSELHSLGQYLQEGPKIFFETILNVKNIPDDCLIPDVFNDIDKLNYLSNKSLSYVNQHALNAVKIAHIQGNVPNIEITFDYLDEYHFGYLVYFFEKACALSA…	Candidatus Phytoplasma mali	00030 Pentose phosphate pathway	0.5724	426	32	44	49	34	1	4	glucose-6-phosphate isomerase [EC:5.3.1.9]
A0A975FIY6	MSLKLNLDGIKTFLDWEKELNIYHSQIKKIHHQLHYDENLKNKYLGWLDLPLNYDREELKRLKELKKQNAYLDVLVVVGIGGSYLGIKAGIELLKAPFSKNKPEIIFAGYQVSGNYLINLLKYLKDKNWAINVISKSGTTLEPALAFRILKDTIEKKYGKKEVQKRIFVTTDKKKGTLFNLAKKEGYQMFVIPDSVGGRFSVLTSVGLLPFAFANLDVDVMLKGALQAFKDNYSDDLLQNQSYQYALARYLMYSKINKKIELLVTYEPCMLAFSEWWKQLFAESEGKEEKGLFVGAVNNSTELHSLGQFIQEGTKMLFETILNVTSIKDDCIVPEINNELDNLNYIAHKSYSQINQKILQATKLAHIEGGVPNLEIIISNLDEFHFGYLVYFFEKACAM…	Candidatus Phytoplasma luffae	00030 Pentose phosphate pathway	0.5219	429	29	48	58	23	1	5	glucose-6-phosphate isomerase [EC:5.3.1.9]
WCA22452	MKKLTSNQIRQMWINFFIRKNHHKENSFSLIPKYDPTLLWINAGVAPLKKYLNGTEKPPFKRIVNIQKCLRTNDIEKIGNTSIHHTFFEMLGNFSIGDYFKKEAIDFAYELLISHEWFNIPKERLYITYFEHDKETYSFWLKKGIDKLNLISLRTNFWQIGEGPCGPCTEIFFDRGSKYDHRGKELIYEEITNNRFIEHLKKDEYKPLPSKNIDTGAGLERLACIFQQTDTNFETDLFFPIIQKISFLSNCEYKGQKFFKIIADHIKSLVFCINDGAIFSNLGRGYILKRILRKAFQSGKKIGFSEPFLFKLVGSVIDIMNDFYPDLNKKKNLIEKMIKEEEKKFLFHLNNGEKIFDKIIKNNELSGENFFKLYDTFGLPQENILEYARNKKNKDFLFL…	Candidatus Phytoplasma oryzae	00970 Aminoacyl-tRNA biosynthesis	0	760	69	99	77	37	11	7	alanyl-tRNA synthetase [EC:6.1.1.7]
USQ93201	MSILPVNKKFYIATSIVYASSIPHIGNVYEMILADAIARFKKLEGYNVYFQTGSDEHGQKIQKKALQQGLDTQKYVDQISDKIKEIYNKMNIKYDFFIRTSESFHKKQVQIIMKQLLKNDDIYLGLYEGWYSVYEESYISEKDLINGKTANGETPVWTQEEVYFFKLNKYQDRLLKYLNDELHLILPPYIKKEILNLLKEPLPDLSISRTSFEWGISLDFNPKHVVYVWIDALSNYITGLDYPFGEDDKKNKLKYFWPCDLHIIGKDITRFHLIHFPILLMALDLPLPKKFLIHSWILFNNKKMSKSLNNTLYVDDLLKIFSVDAIRYFVLHEIPYHSDGILTYDLLFERYNTDLVNTIGNLLSRTLGMIVKYNNGELRKKLNKVKEFESIDLAKESLT…	Candidatus Phytoplasma vitis	00450 Selenocompound metabolism	0	521	32	55	70	32	1	7	methionyl-tRNA synthetase [EC:6.1.1.10]
WBL31579	MKRQKLVKEIKSRDTDFSKWYTDVCIKSELIEYSDLKGFFIYLPYGYAIWQNIQSFLDKKLKKSNHENVYFPLFFSNNLFKKEKEHIEGFSPESLIINKVGAKELKEKLVLRPTSEVLFSQYYAKKIKSYRDLPKLFFQWCSVVRWEKTNKPFLRSKEFLWQEGHTVHLSKKEALKENKYILNLYKKLGKKMLAMPFVSGKKTELEKFKGAEITFALEALMYDGQSLQAATSHFLGTKFSRKFKIQFQDNQLQTQFVQQTSWGISTRLIGAMIMTHGDDEGLVIPPFIAPIQIVIIPLDLKNHDILKKSKEIYKTLNKKYRVYLDEQKKNIGWKFSYYEMKGIPLRIEIGSNDLNKEELTFFIRHSFKKITISDKEILKETKKLLLEINNQMFKKSLYN…	Candidatus Phytoplasma sacchari	00970 Aminoacyl-tRNA biosynthesis	0	475	21	76	47	30	1	7	prolyl-tRNA synthetase [EC:6.1.1.15]
B1VAW5	MNLLEVKDLHTYFETSQGLIKAVKGVSFEVKEGKTLGIVGESGSGKSQTAMSILKLFEKNQKIYQGKIIFNQQIISEFNEKEMQKIRGNEIAMIFQDPTTSLNPVFKIKNQIIEVLMLHRNIDKQEAYQQSYRILEKVKIPNVARVLNSYPHQLSGGMCQRVMIAMALVCQPKLLIADEATTALDVIVQKEILNLISDLQKEAKTAVLFITHDLGVVSQVADDVIVMHQGQIVESAPTEQILNHPKHPYTQSLLANFLKTGV	Candidatus Phytoplasma australiense	02024 Quorum sensing	0.6489	262	13	23	26	15	1	0	peptide/nickel transport system ATP-binding protein
WCA22633	MSLLKIKNLHTYFKTKDKLVKAVKGVTFEVKEKETLGIIGDSGSGKSQIAMSILKLFQKNQNIFQGKIIFKDQIISNFNEEEIRKIRGNKIAMIFQDPMSSLNPVLKIKNQIIEVLTLHRKMSQKEAFQESVNILNKVEIVEPHRVLESYPFQLSGGMCQRIMIAIALSCEPELLIADEPTTAIDILAQKEILSLIKKIQQKKKMAMIFITHDLGIISSLVQNIIVLYKGQIIEKAPYNLIIKNPIHPYTQKLLNDFLITSINGQNYIEKQNFFKSENNIFNFNIFKNKSQPDLDFFEIEKDHFIRCTLNKKC	Candidatus Phytoplasma oryzae	02024 Quorum sensing	0.6489	313	23	38	29	19	1	0	peptide/nickel transport system ATP-binding protein
Q2NIU9	MTSSNQVLIEIKNLSKNFSIKKNFLKPDTLLKANQNINLSIFKGETLSVVGGSGSGKSTLGQVLLQLIKPTSGNVFYYKETTKKAKEFKEKKTKDIEKIDLTTLSNKEKRFLRKDLQIIFQDPFSSLNTHLKISDIIGEGLLIHKMIKGKEDPKYQKMILDIMKKCGIDNYLYDCYPHQLSGGQRQRISIARALIIKPKFVVCDEIVSALDVSIQSQILNLLNDLKKDYQITFLFITHDLGVARFLSDRICVMHLGKVIEIAPSESIFKNPYHPYTKQIINAIPKLKTQNKVLEEIPITYETKKFRFLFQTQKKDLDWHQVAPNHFISCTLKNKATKM	Aster yellows witches'-broom phytoplasma AYWB	02024 Quorum sensing	0.3682	338	18	46	37	23	0	1	peptide/nickel transport system ATP-binding protein
A0A975FIW2	MRYIIKKIFYNFLIVFFIFLISFFILRKTTDPVTTIIGSKNLTSEKIEIHKKEFGLDGNIIEQFKRYSLSILKLDFGKSYEDLNESVFDIFIFHFCNTLKLSLWSCFFGSFLGIFLGILSKFYNSKKNIFFDIFSIVIISTPSFIIGFLLQYFLAYKLDLFNISYFGDFTDMFLPIATLSLVISTYIFKITQNTIEECLKQPYVKAAYAKGLSKKAVYFKHVFKNALAPILSYIGLMFSFLVSGTAVIEYIFNIRGVGHLIKESFNKQNLNLLQCTIICLSIFITFFNLFLEFILLYINPQLNKKK	Candidatus Phytoplasma luffae	02024 Quorum sensing	0.2875	306	17	28	39	24	1	1	peptide/nickel transport system permease protein
A0A660HN58	MLRIENLYKTYSMNKKNISILKKINLNIFEGQIFGLVGKTGSGKTTLLKIMNGLEQPDKRKETKIFKNFTYRESGTIWQNFNLLSNLNVFDNIALPLKIRNYPKEEIKTKVLEIIKFAGLSDCIELYPKQISGGQKQRTAIARTLVYNPKIIFCDEPTSSLDETVNKSILKLFYKINKIKKTTIVIISHDSSVIQTLCNSVAILNKNQIEQIIDLKPSYYFKSLSYKEIFLKK	Candidatus Phytoplasma ziziphi	02010 ABC transporters	0.3251	233	19	32	25	17	1	1	D-methionine transport system ATP-binding protein
AOF54549	MNNYNKIWEIILNELSKIYSDEVFKETFSNIKKIKQIEEKIIISVETEFIKNKIYKMYFEKIKKITKLKFEEKIIIEFVSEKNQKNSNFDDEKKHFENLKEKLENENKNYFSKIENNENNDEFQNNKYFKTIEKEQIETKTDNDTNIEIENRKISFNKYNYGNTNPKYSFDNFVVGKSNNFAFKIAKKIAEEKKVTTNPLYIFGKAGIGKTHLIQAIGNHILKKTHSAKKVLYVKADGFIEEFTNQLRKSKMEDFNEKYRDIDLLLVDDIQIMAGATRTQMEFFKLFDYLYLNQKQIVITSDKQASELKNIMSRLTSRFEAGLMVDIQSPDFNHRLNILKKKILEFEPQNPLKIKKDVLDLIASSFVNNVREMEGALLRLLNYAQTFGYDIDINIANEA…	Maize bushy stunt phytoplasma	02020 Two-component system	0	507	49	77	41	32	0	1	chromosomal replication initiator protein
B1V9D6	MYLEINKDVFLKQLLKIYKILPQKSLFPVFNILKITAKKNTLILEVNNGNIAIQISIEDQSLKIEKEGEIACFGRHFIEIIKKINTLSIKMTVTENNFLVIKTNFCEYKLKLMTLLGFLLPEFFFEKKEFFELKVSSFKKMIKEVNISSSKNEKRPILTGSNLIYEKKTLKALATDSFRISYKKIKLDFPYFDFNMVIPNKSLEELIKILEYYDNKNLKIYSDDKKIFLKIDNLWFCTSLLEGNYPQIQEFNLKNYPFVVHLNKDDVMKVLERISLFFSKEEVNKNIVLFKLTEEKIIEISISNENLGTALEKIIPLKVTSEKFEIAFNAKHLEDILKVLTSSEIVFYFESHLKPFIVTTLEEESSVHLIFPIQKEND	Candidatus Phytoplasma australiense	03030 DNA replication	0	378	28	51	47	25	1	1	DNA polymerase III subunit beta [EC:2.7.7.7]
QYC31009	MNKKEKEIIKIILRAYDHHLIDQGAKKIIDIVTKTGTNIEGPIPLPTRKEVFTVLRSPFVNKDSREQFERRTHKRLIQIINPNKKTIESLMHISLSPAIDILLKKTNSKSKI	Paulownia witches'-broom phytoplasma	03010 Ribosome	0	112	6	16	9	7	0	0	small subunit ribosomal protein S10
Q6YQZ5	MKNIKFIKPFFVEEIDENPISGKFIIKPLERGYGITVGNALRRVLLSSLPGTAIVNVKIQGVEQEFTTIPGVYEDVMTIILNLKKIVFAVDDESDDFEEKLELIAKGPQRLTASSFELPAGVKIINPDHYITTLSDDVCFHMTVTLKKGIGYVGAKDNKVHGENQVGVIAIDSLFTPVVNVSYQVEKKLGNKDELTIEITTNGALLAKEALATAASILVDHFNVLVELSQKPAHVEFVSESKKEAHNSVLDLEIEQLDLSVRLFNSLKRAGIDTVAALVKLSEKEVVKLKSLGRKSFQELKDKFLEYGLEFNDYLKEVLHHSVEEDKDKH	Onion yellows phytoplasma OY-M:	03020 RNA polymerase	0	330	15	33	37	20	0	0	DNA-directed RNA polymerase subunit alpha [EC:2.7.7.6]
A0A975INP0	MLNNSKEINSLASMAELSYQILQQNKQPMAVEQLIKKVFELKKIDFNNKEKFIQLYLDIVLSGCFVFVGDNLWDVKKDNLNLWDQEYFANPTSDEEISTKEEDIEDILDFDEFESKSDENKDNTNEDIKEFKEEKLDLNIDEDEDESGILNNLDENLEEEEIFEVDKNKNDEYEEEITPDYYEEYYNE	Candidatus Phytoplasma luffae	03020 RNA polymerase	0	188	20	18	18	10	1	2	DNA-directed RNA polymerase subunit delta
Q2NJH2	MFNFLKKIFNSSKKALRKARTIANKVQNLEAQIALLDDKDFATKTAELKKLFQEGKTLNQLLPEAYALAKEATKRVTGLTPYYVQILGAVILHQGNIAEMKTGEGKTLTAIMPAYLNALSGNAVHIVTVNEYLAKREFEGSIGDVFRFLGMTVGLNTKDKDQTQKQQAYLCDVLYTTNSELGFDYLRDNMEIEASNLVMKRPYSDSILIDEARTPLIISQSVKETKNLYKEAQRFVRTLKNSHYLIELETKNIEHASLLHHVKNALKAAFTMHKDKDYLVDYKDGQVLIIDQFTGRALPGRQFSDGLHQALEAKEGLLIKKETSIGATITYQNFFRLYQKLSGMTGTAKTEEDEFRDIYNMEVIEIPTNVPMIRIDERHKKGQPILIGTTTVEVSEIIS…	Aster yellows witches'-broom phytoplasma AYWB	03070 Bacterial secretion system	0.6161	785	41	86	72	47	3	2	preprotein translocase subunit SecA [EC:7.4.2.8]
R4S0D4	MFKFLKKIFNSSKKALRKARVIANKVQNLTETMSLLKDQDFVVKTNELKQRYQKGETLNQLLPEAYALVREATKRVTGLTPYYVQILGAIILHQGNIAEMKTGEGKTLTAIMPAYLNALSGDPVHIVTVNEYLAKREFEGKIGEVFRFLGLSVGINIKDNNTEEKQKAYLCDVLYITNSELGFDNLVMKRPYSYAIIDEVDSILIDEARTPLIISQSAKETKNLYKEANRFVKTLKSKHYLIELESKTIELTEEGINKAESFFQIKNLYDVQHSSLLHHIKNALKAFFTMHKNKDYLVNQNQVLIIDQFTGRVLKGRQFSDGLHQALEAKEGVLIKEETSIGATITYQNFFRLYHKLSGMTGTAKTEEDEFRVDEPDFIFVTMQEKYDALIKTTLERHK…	Strawberry lethal yellows phytoplasma (CPA) NZSb11	02024 Quorum sensing	0.6106	787	47	77	76	41	1	2	preprotein translocase subunit SecA [EC:7.4.2.8]
WBL31644	MFDYFKKIFNSSHRYLKKIKKKADQIEKLSQEYQKIKNEEFPQKTNKLKKLFKEGYSLDSLLIQAFALAKEASRRVTGLDPYYVQILGAIALHEGQIAEMKTGEGKTLTSVMPAYLNALSGESVHIVTVNEYLAQREAKGIISEIFIFLGLTVGLNIKEYNIEEKQKAYNCDILYTTNSEIGFDYLRDNIEKKESNLLMKRDYNYVIIDMDANRFAKILKPHHYIIDLEANSIELTEEGIKKGENFFKIPNLYDSNNIVLLHCIKNALKAHFIMNKNKDYLVYKNNVLIIDQFTGRTLEGRQFSDGLHQALEAKEGCIIKEETEIAATITYQNFFRIYKKISGMTGTAKTEEKEFKDIYKIKVIEIPTNKPMIRKDEPDFVFSTLKEKWNALIQDIETR…	Candidatus Phytoplasma sacchari	02024 Quorum sensing	0.5955	767	61	93	72	41	5	1	preprotein translocase subunit SecA [EC:7.4.2.8]
AOF54870	MKRQLKLVLGNRKLMFQIFFTLFIISIVCLGTSWPLPFINTKSLDLSKLFGVFSINAGTLFGLGITPYITASIVVQFLQKLLPICREWKDQGQMGKRKLNLLTRSLALLFAFGQSFAFLNSYSKLFVTSISTSQLFLLALIATAGVAILIWFADLINSKGIGNGTSILIVVSMSHSLINLFVNLNESYLSQKNFLTLKTFNFACIVLLLLLFLIFTVVVQITSLKIPINYARNQVQGKSYIPLKINSAGVMPVILASALLQPFQMLSGVIGNTKFTEVVDFFSKTNFPENQINFFAIGFLVLLVIVFSFFSAFMNVNPEDISEHLSKQDAYIAGLRPGEQTTRYLANTLFKITVLGTVFIAALVVTPILMEHFLGLKDMKLGGTSLLIIVSVALETIQR…	Maize bushy stunt phytoplasma	03060 Protein export	0	413	23	26	65	32	0	3	preprotein translocase subunit SecY
QYC31323	MEFDNIIKTLNEQAGREQKLTSQLIMSFLQNKNIKIPYQQIAQNLKEKGIQIISCETQAAPSLNENPNQNDTHPQTNTTNDDFTDLDSELTNENLENTDDNKDEDNTQDSEEDIQDFDISEEDLISDEKLIELEEDEDEKIYKEEISKNHSDIKMDDSVRMYLKEIGQIPLLSLAEEQKKSILVFLGKQAKQKLAKHKTKEIELSEEQLQEAHDQIEQARRAKDILVESNYRLVVSIAKRYIGRGILFLDLIQEGNMGLMRAVDKFDYQKGFKFSTYATWWIRQAITRAIADQARTIRIPVHIVETINKMALCTRKLTQKLKKKPTVEELADKMNISAEKIRSIQYIEKKPISLEAPARENEEDETSLGDFISDPNILSPHEYMMKEVTQKLLDEVLEN…	Paulownia witches'-broom phytoplasma	02040 Flagellar assembly	0	465	25	46	47	26	0	2	RNA polymerase primary sigma facto
Q6YPP7	MQDIKVSLVEADVHLQVIDKFNEIIEKKTLKQEVLKGLNPKEHIIKIVNETLIQILGSTRADLTFKPNCNLDTLMLIGLQGSGKTTTVGKLALWLRKKNSKKVLLVACDIYRPGAVEQLKVIGKQINIDVFSKPDTAVLDIVDAGLKHALQEGYDAVIIDTAGRLDIDETMMQELQQIKAKANPSEILLVVDCLSGQQSANIAQSFHNQVGATGVILTKMDADTKGGAALSVRAMTDLPLKFVSSSETIDSLDPFNPDRMASRLLGMGDILTLIETVTDKIDPHQSKQMMEKLFDDSYNYYDFQKQLKTLKKIGSVSKLLSFIPGLGGKMKQLSASLGDDGFNKFEVLIQSMTKQEKKNPQLIALSGRRRQRIAKGSGNQLSDVNKLITLLEQQKKLAK…	Onion yellows phytoplasma OY-M:	03070 Bacterial secretion system	0.5461	426	19	45	53	26	0	1	signal recognition particle subunit SRP54 [EC:3.6.5.4]
Q2NK61	MSILGEGLQKVINKIRGKKILEQQDIQNIMQDIKVSLVESDVHLQVIDKFNEIIEKKTLKQEVLKGLNNKEHIIKIVNKTLIQILGSTRVDLTFKPNCNLNTLMLIGLQGSGKTTTAGKLALWLRKKNSKKVLLVACDIYRPGAIEQLKVIGKQINIDVFSKLDADVLDIVDAGLKHASQEGYDAVIIDTAGRLDTDETMMQELQQIKAKADPSEILLVVDCLSGQQSANTAQSFHNQLGATGVILTKMDADTKGGAALSVRAMTDLPLKFVSSSEKIDSLEPFNPDRMASRLLGMGDILTLIETFTDKIDPHQSKQMMEKLFDDSYNYYDFQKQLKTLKKMGSFSKLLSFIPGLGCKIKQLSANLGDDGFNKFEVLIQSMTKQEKKNPQLIVLSSRRR…	Aster yellows witches'-broom phytoplasma AYWB	03060 Protein export	0.5414	456	24	51	57	30	0	1	signal recognition particle subunit SRP54 [EC:3.6.5.4]
USQ93453	MSFLSDGFSKIINKIRGKKFISSQDIETIMKEIRLSLLEADVSYEVITEFNELIKQKTLGQEVLKGIKPQEQVIKIIKDILTIILGHKNTALSLDKKLNIILLMGLQGSGKTTTAGKLSFWIKKKMQKKVLLIAADIYRFGAVEQLKSIGEKIGIEVFNQKDEKVLDIVENGIKYAEQNNFDVVIVDTAGRLTIDTEMIEEIKNIKQKVNTSDVLIVADSLLGQQSVNIAKSFHEQIGATGIILTKMDSDTKGGAALSMKYITKLPIKFTSSSEKHNDDNFEIFYPERMASRILDMGDILTLIDNVEDKINTKQDKEVLDRILQEDYNYNDLIKQLKLLKKLGSMSKMLSFIPGINSKIKKMPFLENDVIQKFQAIIQSMTKEERLKPKLIENNNRRRT…	Candidatus Phytoplasma vitis	03060 Protein export	0.5414	449	27	58	48	31	1	1	signal recognition particle subunit SRP54 [EC:3.6.5.4]
WAN63614	MSFLSDGFSKIINKIRGKKFISSKNIETIMKEIRLSLLEADVSYEVITEFNELIKQKTLGQEVIKGIKPQEQVIKIIKDILTIILGHKNTVLSLDKKLNIILLMGLQGSGKTTTAGKLSFWIKKKMQKKVLLIAADIYRFGAVEQLKYIGEKIGIEVFNQKDKKVLDIVENGIKYAEQNNFDVVIVDTAGRLTIDTEMIEEIKNIKQKVNTSDVLIVADALLGQQSVNIAKSFHEQIGATGIILTKMDSDTKGGAALSMKYITKLPIKFTSSSEKHNDDNFEIFYPERMASRILDMGDILTLIDNVEDKINTKQDKKVLDRILQEDYNYNDLIKQLKLLKKLGSMSKMLSFIPGINSKIKKMPFLENDVIQKFQAIIQSMTKEERLKPKLIENNNRRRT…	Candidatus Phytoplasma rubi	03070 Bacterial secretion system	0.5347	449	29	61	47	28	1	1	signal recognition particle subunit SRP54 [EC:3.6.5.4]
Q2NK62	MFKWLKSKFFKSKNNDKYQLGLKKTKASFLDFQTLLKQSNNIEQSLLQALESLLIQADFGTKTIFFLMQAIKDEINQFQIKNPQKLPSVVFSKMFDLYQNMKDMKNIKDTLESSQEQEQEKKQAKQNQGPNPTNPKDTFTSQNNFPQMYLFTGVNGVGKTTTIGKMAEALKQEGKKVLLIAADTFRAGAVAQLQIWAKRVGVEVFCKPLPAHPASVIFEGIELAKSQNYDIILCDTAGRLQNKTNLMQELAKINRVIYKHLPASNLQTFLVLDATTGQNALNQVDLFNQATPLSGAILTKLDGTSKGGIVFAIKYLYNLPTKYIGVGEKAQDLITFDVKKYLFNLFEGFFTSEDIL	Aster yellows witches'-broom phytoplasma AYWB	02024 Quorum sensing	0.3682	356	24	40	41	17	0	2	fused signal recognition particle receptor
R4S0W9	MKNISFKKNLFFPLFLSLTLFLLFFWPSVKMKINILQKVKIENDIFFVYTLNDKHQDIKIDTKTNYDKWKDSQEKEKRFFIGRKKFNINVSEPENKDPKQLPFAFKGNPESKDKVEIIKKLLTVPAGTNIRYIKDKKFEKLRDLLDFKEGTNHTLTNIFHNLEDTKGSEAKLKQISSDKPLELKSKFTLQEGKNEEIIFFVTNVSLPIQFPQYLEWSAFGYLWNVLIVSVGSFLYFFSYPFASLGLGIILTTILFRTLTWPIYTKTTTFTMNMNLIQPEIEKVKQKYALQSDPASAQKMQLEILKVYRKNNFSFWGFLVSFLQLPLFISINQTLGRFIVPGGIFETDKLIEKPFLGFIKFNQPNHWFVVSLLSFLVGLTMFFLNKVSFKKPDYLKKPTH…	Strawberry lethal yellows phytoplasma (CPA) NZSb11	03060 Protein export	0	471	29	60	58	30	1	9	YidC/Oxa1 family membrane protein insertase
WAN63243	MRRVHVFKNLKLEQFETLKKIYEKFIFPSIQKDIYLIIKKSHIKITCYKNGTCLIQGNDVSDEIEYISKFLDLNFDKSLNNFSNSQISNNKDIISFNEEIDDINFKNIIGSDEVGTGDVFGPIIVCAALVTREQFFFLKKIGIRDSKKLSNDKIQKIMLMAKDKIAYSVQILTPLEYNILNQKYNLNHIKALLHNKVILDLLKKINKEEMVVLDQFASPKNYFNYLKNEKKVYKKIIFEIKAESKYLSVALASIIARNIFLKEMDKLSNNLIGMKLRLGSGYTVDKQIAEIYQKNKELIFFQKIAKCNFVNIKRYFK	Candidatus Phytoplasma rubi	03030 DNA replication	0	317	28	46	31	19	1	0	ribonuclease HIII [EC:3.1.26.4]
A0A660HNA0	MTFKIKTVYKPSGDQPKAIEQILTNFKKNIKEQIILGATGTGKTFAIANVIQKLNQNTLIIAHNKTLAGQLYNELKEMFPDNKIEYFISYYDYYRPEAYVVSNDTYIEKTSKINSEIDQLRHRTINSLIYGKNIIVVSSVSCIYGIGDINDYKLSVLYLEKNKIYSFKQILKQLVEMQYKRNDITFDRGTFRVRGGTLDIILSAETQQGIRIVFDNEEIEKIQIFDPASLYVTNKNKLKETIKRIEEELEERIEYFQKTNQLIEAQNIVKRVTNDIEMLKQIGYCNGIENYSRHLSLKKEGEPPTTLIDYFGKNFLTIIDESHVTVPQIKGMHAGNYSRKKNLIEHGFRLPSTLDNRPLTFPEFEKKMDKVIYLSATPGNYEIDKKIPIIEQIIRPTFI…	Candidatus Phytoplasma ziziphi	03420 Nucleotide excision repair	0.2703	641	45	71	59	33	3	0	excinuclease ABC subunit B
B3R0D8	MDILFENFNILPQTQKALKELNFLKPTAIQNLVISEMIEGYDIIGQAQTGTGKTFAFGIPIIEKIDLNIKQTQSLILCPTRELALQVFQEFKKLIKFYVEIKIAVIYGGESYIKQFKVLETKPHIIIATPGRVIDLLERKKIDFSGLKILTLDEADEMLNMGFQEALETILQKIPKKRQTVLFSATLPPTIQKIANKYQNNPKVLKVYQKNIAVSSVQQFYFLVKEFDKLKLLVRLLDLENPNSVIIFANTKKDVDEINAYLQENNFSVDFLHGDLKQNQRQQVMNNFRNQKIKILIATDVAARGIDISSITMVINYDLSRQNEIYVHRIGRTGRAGLKGLAYSFVAPSKLSQLKSLENYLKEKLIFKTIPKVKDIQEKKLKNFQEKIFEMIKNNPQED…	Candidatus Phytoplasma mali	03018 RNA degradation	0.2026	531	50	63	60	24	1	1	ATP-dependent RNA helicase DeaD [EC:3.6.4.13]
A0A975FIL4	MKYLTDFKKKFQIDSFNKKEIKHFLIDIAINSIETELLCYPSLGLVSFRDSGCHLDMNIDTFLKSKDTFYAYFLEISVLCMDFEELNFAQLKLAGIRQEQRMFKATNNINTQKGLIFNFGIIFYVVFHSLIHNIDFCYWSDKIKQFAKPLENDFLFFKDKTKGEIIFKQYGILGARGEALSGYQNIFAKGLPFAKKCFDKYPYLKKNELYLCLLIFYLKEIDDTTLISKIGYQNTQEIKEQFQELIYILENINFEVFLNKIIKNNNFYKKQNISPGGCADLSVVTLFLFYFYK	Candidatus Phytoplasma luffae	02020 Two-component system	0	293	20	33	33	13	1	1	triphosphoribosyl-dephospho-CoA synthase [EC:2.4.2.52]
WBL31426	MLEIILKLKQLDLIFFFIIILFVFYLIGSIPIGLLIGKIFIKKDLRLLGSKNIGASNAARVFGFKYGVLVFILDFAKGFFSIFLGPLIMIKILNLINFSSIIFNKDEFRIYFGLVTILGQMFSIFNGFKGGKAIATSVGVISFINPFVGLFGILSFIVLIIFFGYAFFASLISTLLVNFLLWIFFYFNFLPNYYIYLKEIFVICLITFLVFYKHLNNIINWIKGKENKFIFFTNKK	Candidatus Phytoplasma sacchari	00561 Glycerolipid metabolism	0	236	15	19	33	12	1	2	acyl phosphate:glycerol-3-phosphate acyltransferase [EC:2.3.1.275]
USQ93562	MKILFIGDICGTPGVDYLIEKINFLKSKYKYNIIIVNAENVDNGKGLDYENYKELIIAGVDIITMGNHTFDNNSIKNFISSSNIVIPVNLDSECTASNGYKIIKYKNKKILIMNALGRVFINNNNLSCPFEKIENILNICHKKYNYSFLDFHAQVTSEKIALAHYFDGKIDAIVGTHTHVQTNDDKILPKKTLYISDVGMTGPYEGVIGQDKNIIINNFINTKHKKKHKIAEGKRQLNGVLLTLGPHKKITKINFNE	Candidatus Phytoplasma vitis	00230 Purine metabolism	0	257	30	31	18	11	1	0	2',3'-cyclic-nucleotide 2'-phosphodiesterase [EC:3.1.4.16]
B1V8X3	MGIKLSQVSKVFFDKKNKKETCVVNKISVDIPKGKLVCLLGPSGCGKSTILYMIAGIHSISSGKIFFENKDVTNVPIEKRGIGFVFQNYALYPHMTVQQNISFPLENLKTPAKEILVKVEEIAKLVGIEEHLDKKPHELSGGQQQRVAIARALVKKPQVLLLDEPLSNLDAGLRLKTREEIRRIQRKTGITAIFVTHDQEEAMTISDEICLMKKGEIQQKGSPQEVYSNPRNLFVAKFLGNPLISIFEGEIVFGKVYLGKSLLFDFSHDKNLKTLKQKVYVAIRPEGYWFAEDGNLEIETLFLETIGRDLMLLARHPQAVNNTFRLVFDEKSKDIIFPQGFFPKQKIRFQIKQEKCFLFDPETENRIF	Candidatus Phytoplasma australiense	02010 ABC transporters	0.5373	368	16	39	37	18	1	1	multiple sugar transport system ATP-binding protein [EC:7.5.2.-]
AOF54624	MPELPEVQIIVDFLKTQLIGKKIVATKVFYEPAVKNTKEFQKIEQTTILDIQRKGKFLLFFLTQELVLIGHLRMEGKLFIKPCDEPKHKYEHFAIILEDKSSLRYYDFRKFGRFEVKNQNIFLTQTTLHQLALDPFEINPVVLYQKILKTKSALKKVLLNQKIISGLGNIYVNEVLFLVKLHPETKACELSLEQVQEILTFSQKVLTKAIKLGGTTVSTFESQPGIIGYFQNKLQVHGKVNKPCINCQTKIIKIKVGGRGTYLCPVCQNHNPNKEL	Maize bushy stunt phytoplasma	03410 Base excision repair	0.7	276	13	34	34	8	0	0	formamidopyrimidine-DNA glycosylase [EC:3.2.2.23 4.2.99.18]
A0A421NVC5	MPELPEVQIIVNVLKKQLINKQIINTKIFYKPIIKNIVAFKQIEGKNILDIQRKGKFLLFFLTKNLVLIGHLRMEGKLFIQPRQKKHEKHEHFVLFFNDNTSLRYYDFRKFGRFEVHHQKDFLTKTNLYKLALDPFEIDLMTFYRKIIKTKTALKTVLLNQNIISGLGNIYVNEVLFLAKLHPETKACTLNIQQAQTILTISKKVLKTAIQLGGTTISTYESQQGIQGTFQNSLLVHSKQNYPCFNCKTKIIKIKVGGRGTYFCPLCQKHTQ	Candidatus Phytoplasma solani	03410 Base excision repair	0.7	272	17	34	32	7	1	0	formamidopyrimidine-DNA glycosylase [EC:3.2.2.23 4.2.99.18]
B3QZU2	MFKKNFLDYFYLNLILLFIYIPILSLVIFSFNQTEGRIASLVNWERFGFRWYGKIFSNSAIRNSIIVTFKIAIFSTFISTIIGTLAAISLAQNKLKWQHFILNLNQISFVIPEIIIALALFVFFGFIRLENGFLRMLFAHISFSVPYVLATIFPKCNNFEINLFEAAYDLGANPLQTLIRVVLPQLKSVILAGASLAFALSFDDFIISYFVGGSDYQNISSYIYSLKGTINPAINALSSILILFIFFKIFINYLKLRKESIFK	Candidatus Phytoplasma mali	02010 ABC transporters	0.25	263	18	13	34	23	1	3	spermidine/putrescine transport system permease protein
USQ93155	MLSRIPNKKENKFYKFLYLPYFIILILFILIPIFIIFLYSIQESNKNSLFNISFTLKYYKDFYTTKVFIYVLFRSILIAIISTFFILLITYPLAYIVSKYITPIQSILILFINGTIWINMILKIQSLMQIFFLIRKILGINLLETNSAMLIGYVYLFLPYMFLPIFLSISKIDHNLINSAKDLGANEVQIFKKIIFPLSLPGLTTGVILVSLQIATNLVVPKYLGPTTITVISELIENKIFLIGDIKSACAIAINLTFLMLYILTFYKQNQFEKKNKSNV	Candidatus Phytoplasma vitis	02010 ABC transporters	0.265	280	18	22	42	19	1	1	spermidine/putrescine transport system permease protein
QYC31337	MKTLIILKDLTKVFDNQLILRGINLEIKQNEFVTLLGPSGCGKTTILRILGGFENPSSGEVLFQEKSILNVAAHKRPINTVFQKYALFPHLNVFENVAFGLRLKDFNSKIKANLALNKTHYQTNKANLSKTFHQELTKDLTQEKTTQIKHNFNNQIETLTKDFEAKQTALKCKKINKKEQEEQIQKEVLKYLKIMGLQGLEKRTIEQLSGGQQQRVAIARALINKPQVLLLDEPLSNLDLKLKQEMQYELKEIQKNSGITFLFVTHDQEEAFTMSDKVVVMNHGEIQQIGSPEDIYNEPANRFVAQFVGESNLIKGVMKDDFLVHFDNQTFNCVDKGFRKEENVDIVIRPEDIDIVSQGKGLITGIVQSIIFKGVHWEIDVKTAQRTYTIHTTDHVELN…	Paulownia witches'-broom phytoplasma	02010 ABC transporters	0.5373	417	29	42	42	14	0	2	spermidine/putrescine transport system ATP-binding protein [EC:7.6.2.11]
B3R042	MKEANIIKNKNNKYEIFSLKSLFFLGLMFICVLNVYMFKQNTASYYQQLFTPLLLCMVLGIFLHFVGNMIPFLNKFGLSFLLCALVPSYLVYQKVISPKLVEKFHEDFFNKGINFPHFFILLVIAGSIFSIDNKLLKKSMKKFLPLTLISVTVAFLLVGGIGHLLHFSVPKGFISKGSFLDAIFYVFVPITNGGVNFGVNGLTNGLYGRVSSKINNFELRAFLIAPLILTRILAIVFTSLLCNYLNKTKLNGQGQLEYIKNKNKSDLTNKNKKLFELSDIRTGLLIAIAFYMLGRVLSFVFFKNNDFVLVFMIILLFIFKLFNLMPISFQGNLIQTGKFMTTNFAAPMLVGFSLTTNWKILLAALTASKIILLVLTSLLTVTLISLLLAKKFGFYALEA…	Candidatus Phytoplasma mali	02020 Two-component system	0	457	31	36	77	32	1	1	malate:Na+ symporter
CCP88019	MKLLINNKDKKISFIATLLIIGITVLILSIPICALFYRQFKPKSNDTKRIVVTTTMLQDLVNHLIGDVNESEQSKNYQKISNIEVKTLMGIGIDPHNYKTKLSDRAKIQEADLVVVNGLNLEAKMPDAFAEFSQKDCLWNAGDKLKEDINFKEELLKKDYSEDYDPHIWFSPDLWIQTLQNLKDVLIAKNIVKEKAKLETNFEIYNQDLTNLKTHIVKEMKDLKTNIEKQQNKFIIVTAHDAFSYWQQFCKKNHCSFDLEPIQGISTQTEASNNKIVTLAKKLAQHNVQAIFTENSMPKNSLKSLKEEVDKQRQKLKMTGTIKIPDNVELYSDSLGTNKHEEKFEDIFYKHSTYVGAFLNNIKIIKENLL	Candidatus Phytoplasma solani	02010 ABC transporters	0	370	30	48	38	20	1	4	manganese/zinc/iron transport system substrate-binding protein
R4S0E6	MTPIKKNTKNPLKFMKIKKIIVFIFLDIFLLYLFIVSLGRVFLKEKCPKYLGFSFFNVASGSMEPYIKGPPMGSNSEIGDTVFVRGVWDCKNLKAFKNNACGKEPAQKPFNNDPKNTEYNPNDGDIVVFKSTTKKDKIIIHRLIYNDTENKCLYTWGDNNDHQLSDEKKIPYENVVGKLMFKDRYFIPTINKLIEYFGNKPLYAVFTIIYLIVMFVLLGIIKKNWNQADE	Strawberry lethal yellows phytoplasma (CPA) NZSb11	03060 Protein export	0	230	21	30	18	8	1	3	signal peptidase I [EC:3.4.21.89]
WAN63611	MNLIPIGVSGRHAHLSQETLDILFGSKNYKLTFCKNLKQKGQFAAEEKIDVMSLSGQILKNVRILGPVRKLDQVEISQSDSLRIKMQVPVRSSGDIKGSAPAILIGPKGQVEIKEGVIIADRHIHFSPQEAKEFNVVDKQVINIKIDGIKSGILGNVLCRVDESFSLECHLDTDDASAFLLKTGDSGQLISEI	Candidatus Phytoplasma rubi	00620 Pyruvate metabolism	0	193	7	17	19	18	1	0	putative phosphotransacetylase [EC:2.3.1.8]
A0A660HLY0	MKKMDLRDYYQKHKKILIISFILIISFIMILFAKKIFDYTQKDTNKNKTKNEEVINERNSSNFIYSVPNEIGQLFPNLDMGSYSCYTDTQEFLSSNCLRSPFFKEIVDENELNNYNEEQKKEIIHQKPYELPRKLKFGLVEQIEKPNDFTECIGTHGGWNKSFHKKDKKFIFKLRENAKFENQIPINSNFKEIIGFEELKIFPNENYKFELILQNNKSLYEVIKFLNYIVLLEKNSFERSCVNEGNREEIKYGTSLDHPLVSYGPFKVKTGYNDSKWIFERNPEHFEPFNSHSDYETIKILIEHNSGNAIREKELFEKGELSLYVVEHGAELDDNFFNKFQKDLFCAPEEYSLTINLEGERVKNINLKKALFYGIDKKSITNVFLHPTLDYMNDTYCDK…	Candidatus Phytoplasma ziziphi	02024 Quorum sensing	0	594	61	69	50	35	8	2	oligopeptide transport system substrate-binding protein
Q6YRJ1	MILVVLFFTAVGPFINPLPKTTQEKEKSWIALLPLKIPFLEKFGIFDGTKKVDLYLDEIEQIKKFNPNIIKKQQAIKDNKQTVILDAYLYCEYEKSYINLTFTQKEYDRAKQNKSLIASTPLQNGLYRVKIRLFKYVFNKTSEKTYFYFGTTHEGNDLFTQVWKGSFISLSFAFIVSVCTLIIGTIIGAICGYYGVLVDLIVNSIVDFLSYLPFMTLVLVLMLKVGISFWTIIGVFLIKGWIGAFYYSRASFYRYKNKEYIISARMLGASDLRIMFKHIFPNIIGLMITSFALAIPGFILTEAVYSFVGVIKYPEGFISIGELLDKSFDKIGSFSYLLILPMSYLIYLMFAFNLLGNNLREAFDPASN	Onion yellows phytoplasma OY-M:	02024 Quorum sensing	0.2875	368	16	30	43	24	0	4	oligopeptide transport system permease protein
WCA22294	MITVKNLSFSYNNKKVLKNLNFTISDNKWVSIIGHNGSGKSTLAQILIGLFLSYEGKVFIDNIELNENTIMQLRPFIGIIFQNPDYQFVGFDVKSDIAFGLENKNLSRDEIYKLVHKYADMLGIRKLLDKKPQELSGGQKQKVAIASVLAMEPQILIFDEPTSFLDPKGVTEINDIIRKIRQTKRIIITITHDFSLALKSDEIMILDNGSLLEYDKTLNFLKNSFFLNKFFFNLPLSLKLYSEFCKKKYIKKINPRSLEKIKEILWEYSLQT	Candidatus Phytoplasma oryzae	02010 ABC transporters	0.3554	272	20	31	34	20	1	2	energy-coupling factor transport system ATP-binding protein [EC:7.-.-.-]
AOF54559	MKIGFFTDTYLPIIGGIPISVKSHKDSLEKLGHKVYIITPQGPKNYEEKDASIIRIKGIPIPFKGIEGHRVVLRFKKYLSLVKDLNLDIIHIHTEFPMGKLGIYASQKLNIPSVYTMNTMHEYFFNKSKNIGIKIFKLFFILANRKALKKFISKTHSTIVPTHKILTLLEKDYNIKGKYNVVPTGINLEQFYSQNHSLEEIQALKVKFNLVNDFVCLYVGRLSPEKDISYLISAFASFCQNHPQSKFVIVGDGPEKKDLQKQVKQLQIENNVLFLGFVPYDNLGIYYQLGNCFLSASLFETQGLTFVEAMASSLVLLARHDQALDGLIDNGNNGFFYHQKEELINYLSLLYNDNKKTKTMSMNAKNSILNYDQTSFASKMIQIYKEAIKTNKENNNHN	Maize bushy stunt phytoplasma	00552 Teichoic acid biosynthesis	0	398	32	43	42	26	0	0	1,2-diacylglycerol 3-alpha-glucosyltransferase [EC:2.4.1.337]
