# Supplementary material for: PhyEffector, the First Algorithm That Identifies Classical and Non-Classical Effectors in Phytoplasmas
Source: Biomimetics (Basel). 2023 Nov 17;8(7):550. doi: 10.3390/biomimetics8070550 (PMC10669590; doi:10.3390/biomimetics8070550)
Supplement: Supplementary file 1 [file biomimetics-08-00550-s001.zip › Table S4.xlsx]

## Sheet:  Testing set (226)
ID UNIPROT	Sequence	Organism	%Identity	Length	Asparagine (N)	Lisine (K)	Leucine (L)	Serine (S)	Cisteine (C)	Triptophane (W)	Type protein
A0A081D545	MNQVIASPKKESSDKKRDISEINKSEEKNKKQKEDIKRFYTIHKEFKEYSIEKNNEIIKILENPELMEILKQKAEEETKNLKEEGSSSKQSDDSKK	'Chrysanthemum coronarium' phytoplasma	0.2073	96	7	21	4	11	0	0	SAP11-like
A0A5N5XS43	MYLNSKKIRLNSVFLFMVLSFFMLINYSKSNLIYAGKVYSIFNKSNYSEKEINYSEKEKEIEILTSQIDDLYMQKNSILNEIHKSEKNLLSYLKIQNQTNPNIPEKNLINLKFQIFFLRKKKLLLEKQLEEIYLEKVYLEIKLRRILSSYKK	'Cynodon dactylon' phytoplasma	0.1356	152	15	22	23	15	0	0	Effector
A0A0P7KHM9	MAIIVNKKCQNGNLYIYYSNGKIKTIRPDGTVTWKTKKINFRLAQKSLFFIEKGEK	'Echinacea purpurea' witches'-broom phytoplasma	0.129	56	5	10	3	2	1	1	Effector
A0A0P7IR80	MAKKIIETKKNQSQNNNKTNKNTKNNKSTKIIIKRKTPTPKIIIETQTNKENWLLKIIKNSFNILIWSIPFFLIGGGIYWILFKFFPDLYHQINAFTGDVAIKTKSFYDKTTQPIRQVVENVYNKITGNDKNPLSPKAKLSCYLTTTLSVIGICLGIGKIGNWLKKGKKPPIKQGTKALLQKRANSLSGKILKIGSKVLGLVFLVATTYELYQFYREETKIPHPPQPLTQQIKNPPTLNLPTNMKDEKTTITNHDEVKETITPAEKTQEESETGNLNNP	'Echinacea purpurea' witches'-broom phytoplasma	0.0517	279	26	40	24	12	2	4	Effector
A0A0P7J131	MAMDNLNISRISNNQLNHDNHLNIEEIIINLKYKIYDNATEITKITHKINELVNNDNQK	'Echinacea purpurea' witches'-broom phytoplasma	0.1724	59	13	5	5	2	0	0	Effector
A0A0P7KHJ8	MCKQIKKKIAKTLNISYNMLNFAINITLLVLVIIWFMQIILAEMQINLGTKLSYKDFSTQLEQNKNITSINIQDSGNNFFNKDSYKRIEIKTNQNNVFFTDTDEPLYIKMLSKIFILLENNNNINLNYKTKTNHLSSLLLSLSILCATLNGINYLMPKKIKNWFNDILPS	'Echinacea purpurea' witches'-broom phytoplasma	0.163	170	25	18	23	12	2	2	Effector
A0A7G3ZP76	MFEKSMQHKIIKLLITVFMFFLLLNIFLIILFKLNNESKKSKLFLNTQINKVAKLKTNTPEEQKLIFIDNNIIDPDEVIVILKERIVNQFLKRNKIAKAFELANKDLDIKFTISNRNQPIKDEKKFIKELIKIDPQITLKDDVIEELKYILLKEYREKKQLFHSYDFFVNYKLIHNKIRNSHIYKIHELYKNSQIQNIKYPFYTIVLKFILEDKENEIIKSKEHLKQLQANFNYYNVIENRIKNEKEFENNLIAIDSTLTYQQNLLILKEKIKNQFKEKNQLAKLYDQMRTEIELSSFETKEQYYIQNEEDYIKNFLFTSVNMPTSEEKILEHFQRILLLEYKNKKNILNLYSSYLKKIIDIMLDKISNNFITWSPTKIGIINKIINNPLFTSFLRLEI…	'Echinacea purpurea' witches'-broom phytoplasma	0.131	799	79	105	74	26	1	2	Effector
A0A0P7KH51	MFKWVIYQEKWQKYEQYEQKKNNYNIFIQIVLIWFLIILSYFIIFFFPISKKISKIPFMHIPDNSESKSMSFNLINIIKEKTSLYRFLIKLPYYLVGSCKLEIDKALKENFVYEQNSNIEFNKSDGLITIHNVEKILNHNILIGETFIPLKFGFRKNREHYAFTFQIYFIAYKLSYSDDYDYRIKVRKK	'Echinacea purpurea' witches'-broom phytoplasma	0.0423	189	14	23	15	13	1	3	Effector
A0A0P7IR61	MFLVNNLWNQLKFFGIFLAGFGAGGITFSLVYLFFIVKNFNKNFKISFNETEDLSENEKVNKLIKKHQLTFLNKTQENPQKYIEILFQEIQKLTLEIATIFYPRSTSPCLELNLGETLLLIEYLHKRIDILFQNKILCIFKRMTLRQIMVLKYKLINKKYLQKIQKTNKLMNFLSTSVNIINPFYWAKKLFLQRLYHILLDKIGLAIILISGEEVYKVYSKKIFVPDQDLKLYLQNLKQELDKNNK	'Echinacea purpurea' witches'-broom phytoplasma	0.1875	246	21	31	40	9	2	2	Effector
A0A0P7IRU2	MHTKINNIKKFFNIKNSLNIFIILILFTFNYITLNSKFLLKANTTEETSTADDILAFLQEIKSKPEIAKNSSLSSQCDALINEYDQIKKAIYTFFNENANIKQLKSTLFDKKDEKISSVRNRINSIDDIVKNLPNQDNDALKTKSKELDDSITEYLNTINDLIESSLYLQNTQPEEVTIDLLTNNLTKFQEICNNFQDKTEKLRQLNSDILSLATSEHLNADIKNELDELKIAIENIYIPVEAQLIKEKIIDQSTNYKQLSLDTIIKQTFNDEFIKLTNLKDEINQVINTDNNSNTNTNNSDNDNFKLSSDNNSSLATKLFYLLCVIITITFLLIIYQFNKKPQHKNHL	'Echinacea purpurea' witches'-broom phytoplasma	0.0769	349	46	36	42	27	3	0	Effector
A0A0P7KD37	MILKSKKINHLSGFILFLLIIFLFFTLISIITFAFKLYNSRQSLNNYSNESYLSKYIDKPKKNIENTNIPTSLFRKINGIDIEFKFLGYLDGVDEKGNINIIYEGSDANLRLKCYINFKTKQHLEESVYQRLPGDEWHAVTMDYFPPVNKNI	'Echinacea purpurea' witches'-broom phytoplasma	0.1333	152	15	15	17	11	1	1	Effector
A0A0P7HWW1	MINLRKKHFLILSIILLAIIIIFIYIKKTKINNDYENDISFQEVSNSNLSEEINSKALESIQDFDVYPKDKNVYISENINNVNNNNIDFQEISNSNFANNMGFNLQLLDSNFIENIDLEMQSSIQGFNTLAENNHKTNINIDQWKKIKNYFLEFYCDDVFEISFLPTKDQVFIQNEKTKFNIKEKIKQKQDVIYKWQKLFNESQIKINNLQKKINSLPNPQIIENEFKQLTTSENNLKQRQLYKNNNIPNIHQQIQKYDIDKENEKLQSQITQIEEKKEYFYKEIKKEKENQKRFSKIIYEIKKNHYDEIRYNIQYIKNNFYIESV	'Echinacea purpurea' witches'-broom phytoplasma	0.1412	326	48	41	21	20	1	2	Effector
A0A0P7IRU8	MIRINNKKKADSLKKKKYCNDQTKISLKTNKDKKNLLYKFKKISNLTKIMSFLIILIIFVTIVGIPIGYFIYLSLQK	'Echinacea purpurea' witches'-broom phytoplasma	0.1429	77	6	17	9	5	1	0	Effector
A0A0N8IAT0	MKKIKHYLYWINFIYLIFITIMIIIVYIILNIKIKITITKIENEFKYLNNKLNKIQDNQFIKNDNEEKQIQDTLTYEKDDDIEIK	'Echinacea purpurea' witches'-broom phytoplasma	0.1064	85	9	13	6	0	0	1	Effector
A0A0N8IAT5	MKLLKLNKFLIYIIIIIFICLFNKDFLNLCALEINNYEKDYNLKYYAVNWRHENGHMFSEKAHVFYKIFPMKMFPCKTYQEFANTKQIIKNTTILTSNLLFPFSRIFKILDTIQEVASDKYIHDSDDKIAFINELLKYLIKYYPEKGIFFFDLDQLNEIYYVDITFCNCDMSKSLFSVSHELFKNFLQDEVEKIPYIEIFINEASELEISELNLDIKNFCRQTIQNDSVIRNKIKQIIIKKIQDNIGRQITKTCFSQTTKFISSKLIGNLLLPGIVESCEMIKQNQDSTKNIQKNIRLYLKNYNFEKTLGFAFDYNNLTNQLEVFSLEQKSLSTGLYANFLDKINILDSTHMLISFLQPKIKGKPNMNLNIYGSKVKVNLNSND	'Echinacea purpurea' witches'-broom phytoplasma	0.087	384	38	41	42	24	8	1	Effector
A0A7G3ZNT1	MLGNIAGNVADKGLLNKLGDYIDKKINQYYDGQSQSAKPLEYVTTSDNSKSLGQGQLKVGHAETDNSKSLGQGQLKVGHAETDNSKSLGQGQLKVGHAETDNSKSLGQGQLKVGHAETDNSKSLGQGQLKVGHAETDNSKSLGQGQFNRNRVVFNSQKSPRRSKNKKTRYISNQNQNLDSVEYKEKTEKKL	'Echinacea purpurea' witches'-broom phytoplasma	0	191	17	24	18	20	0	0	Effector
A0A0N8IAT3	MLGNLLAPFGRGLFVIFDNSQRNANNLSVLNDEIQKHESITLQNIKNFQITQQKTLLNSENSKIKKYDFLNHLLSIKIE	'Echinacea purpurea' witches'-broom phytoplasma	0.0476	79	11	7	12	6	0	0	Effector
A0A0P7IC34	MNFVKNILKNTLLMAQISAAMLGFKTIDLFQDEVNAQLAPLKRALKFFYTKRKLNETLEIINLSPREIYIILNELNKEDINNLSPKQIYQILKKQTKDKILNVSEEWENINNIINNADYETIKKLHFIFVKYKLYNDEKILLNKILRIINLSPQQIYIAFNKNNIDNLSLQKKDEMLNLSTDYTMSENIDNINWETINDIINDADFETIKQWNLRFGRYYYNNLYQKNNIFNN	'Echinacea purpurea' witches'-broom phytoplasma	0.087	233	36	24	28	8	0	3	Effector
A0A7G3ZPG5	MNKIYESLRVRYPSIYYELQKNDSFVLSNKFKSCSIEKIKIILKHSEDIENILIQVHYQKNKNNQIEFSIPYMMLLTYNQIIEILLDKYGEVPGNYFFNRTCTQINEYIKRSSEGLQIHHIKENEMKGLSNPEFAQQAPFSYQMGYNLVYCNLLEYFLLHCKIWDHN	'Echinacea purpurea' witches'-broom phytoplasma	0.1414	167	16	14	16	12	4	1	Effector
A0A7G3ZNP8	MNKLWENISYLVMVFCITSSIFLIGVIVVNYDNINNDNDDNNVVNYDNINNENNDQYVVSTNTNNRNSNVRKDGKKDQKQRSAGQQQVQKSDPNIQRDDAFVLSDEQFQDQPIIEEPFSQENHEINAQNFQENDNFNADEQENVQSNDVSEQEFDSIDNIEDSSVPQQEKIEDIRTNNKLSAFRRRYFNDPHFYQYIEKVLQCQPVTWNNLNSEDLFSFFQEEPDKFFNAEQRNAIITSYLADHNIRMLLKDYINNTPIRFSQLIKFGFTWEQLAFYFEFINPNFHKYIQKILNGQNIVWRELGTIHSRDLMVFFKAEPDKFFTKEQRNRIIKSYLKNYDIRSDLKECIKENHDLFSQLIKFGFTWEELSFYFEFENKNFAIYINKVLKGKKILYINPK…	'Echinacea purpurea' witches'-broom phytoplasma	0.0897	573	63	45	45	37	3	7	Effector
A0A7G3ZPZ5	MNLHNAITYLSGIFNFIKNYYHYFINIIFGLIMFILVYLAIWVISLIINILRLLPKLNFFNKSSAITHYHLSKPNLNNNDLQNKISPPRGIFFSSFIIFILFIILLMISFFFIKRFNFAPITKILGLSDFSKNKLHQLTALPNNSSDNMFVFRQKSVKELDKLDAILKSKDYHPVALESEQKQLLKELGDLKSQIIATSDMSETQITNNITELQQKVNKLNHKYGEIIMSSADVLMLRQKSVQELDKLDAILKSKDYHPVALESEQKQLLKELGYLKSQIIATSDMSETQITNNITELKQKIDKLNHKYGEIIMSSADVLMLRQKSVQELDKLDAILKSKDYHPVALESEQKQLLKELGYLKSQIIATPDMSETQITNNITELKQKVDKLNHKYGEIIM…	'Echinacea purpurea' witches'-broom phytoplasma	0.1138	426	35	44	58	35	0	2	Effector
A0A0P7KCA6	MNNLKKLIKEIIFLIISVMIIFTPAYFIKKHQDEELH	'Echinacea purpurea' witches'-broom phytoplasma	0.0714	37	2	5	4	1	0	0	Effector
A0A0N8IAX7	MQKQDNDILELKNIYYDEISSITANEDLLTSIDSEYKDNKKISTNDNSLTIIDSEYEDNEKLSVISDSLMEKDLDYGEKYLNKKSSTNANAKIIKDIPRSKKISPSVLKTIIASSFGLIRTTFYKIVFAFR	'Echinacea purpurea' witches'-broom phytoplasma	0.0545	131	10	16	11	17	0	0	Effector
A0A0P7KDF6	MSADQISPRSIGYLKFFSEKRTTDNHEEKGNYGFIYRNPNLSEEQQLMLQNKVQELKDMSSDSEFSSDAINDKYSEIKELIGLDTKSLEEVFFHVSQIADRSVIEMTPEDRRNFFYQGALFEFDVESTQQGLKAVRINKIF	'Echinacea purpurea' witches'-broom phytoplasma	0.1279	141	8	10	10	15	0	0	Effector
A0A0N8IAS3	MIQIKNKLYLLPLFLINYLGLFLLINIHPVMAADNNKNQQKEDYDLVDKAINDLNEGIEYFNKKGIQINLTRITKLISTKQKRNNKTENSSSSSKKIKK	'Echinacea purpurea' witches'-broom phytoplasma	0.4	99	13	15	13	6	0	0	SAP30-like
A0A7G3ZP82	MLKLSNQFKIISICLFIFLGLLFINNNNQIKAMNNNDPGTSNNIYNSLGEYRKYQNLLLEQRIKAQEVINALKQQVSENDKKLLFEQLETIHKQIILTQQKHLNIQQQITTKLIFLNQIKILEQNYSLLMQEMIEIINNTPLYASEEQINLLRNKQIMINQNQENINQILEQMNQLPIPRINLSHNNTSQKR	'Echinacea purpurea' witches'-broom phytoplasma	0.5814	192	29	14	27	9	1	0	SAP40-like
A0A0P7JJR0	MVIYQNKLYFLLLFLVGYLGLFLLINIHPVMAMDGYNPNDPHSIKNEILKISSKRDNISKKILHFNKLNLNPYNLIRQSKDLAQNMTDLYKRIAHLNALNCINQKIWQYSYERNQIAIKIFSLSGLYQDTTMIEELNKKHQEIIQKIQNLNQKYFHLQNELNANL	'Echinacea purpurea' witches'-broom phytoplasma	0.3	165	21	15	25	8	1	1	SAP45-like
A0A0N8IAV0	MLKLSNQFKIISICLFIFLGLLFINNNENNKKLYALPGIDLNIRQQQLEEERDRLLISLNNIFNNMDLNSSTRLRMMREVTESMNCTLDDLQRINQQIFMRDQYHLQNQNNRNQRNQRNNTRRN	'Echinacea purpurea' witches'-broom phytoplasma	0.379	124	22	4	18	6	2	0	SAP48-like
A0A0P7J0F0	MNNQDNMKIHDIHLENTEDILQHLINKNCYESFSYFALEYPCYNGQNVKYDLIWKIKNPLFKQLGTNEYKLMCVLFDKGERDKKDDIYSLEDLKQMSNGASNMYIFWLKNKFLDPNDKKNVQNLIFNRLELEFKQKQIKEKIKEINELLNYLSQEEKKFSNLENDFKLQIKSLLKDKKSLEVEIINLRQKIKNLEDTKNDENILKNKQIKELNSQLNLLKKDIQNEKEKYQQLNNSFNNKQKKYSGIRDFLHQNFFRF	'Echinacea purpurea' witches'-broom phytoplasma	0.3663	258	34	40	33	12	3	2	SAP49-like
A0A0P7KH40	MFKLNKQLSLFNIILFIFLGFLFVVNNYKVMAMKNDKNKSFSEVKDEEILFSNDSEVNIDKIYALHEVGHAIVAYELGQRHSLIDIARINLDKQQENLIAGTTTFQADDDHFSLLDQLAFYFGGIEAEKTTNEPLEQIKYRFQHDEKEIKIILKKIIQNKLFLDLYSNANSIEEQKNILKNIAQKMAEEVIIKYRNYLCIIAEELLQKKRMSSFEFKKIINTLINDEQEINQEEINQEFKVQKKSKSICNCIFL	'Echinacea purpurea' witches'-broom phytoplasma	0.2727	254	22	28	26	13	3	0	SAP55-like
A0A0P7JJ83	MMQVKKKLHLLPLFLMSFLGMFLIINNNPIMASSNGHANNNGHNINNNQSDLEIQANILLDLNLQQAQLVQQIFQARENNASEEFINNLMTRNMELSQRIATQQRILHNTIPQHSNRSNNSSRN	'Echinacea purpurea' witches'-broom phytoplasma	0.2935	124	23	3	16	10	0	0	SAP68-like
A0A7S7G0D6	MFIYFLGLLFKMNNNQVMAMNNLNDENYINNEINKLYLERKELATKISYFLIHHLDDDVKLQKQLNDLDQRIKNLYQRIYDIKLLKSINEQIWHDSYERNQIAIQILSISYQNPAIQELMTKHQKLVIKINNLNQNILIYNIN	'Parthenium sp.' phyllody phytoplasma	0.0943	143	21	12	20	5	0	1	Effector
A0A7S7JMQ5	MFYYNTNKNIILAMNNNLTYYNAPNYYTNYNDPLQNLFFQANQLNQIISNSLENTEHAQLSNLFNQLRQINEQIITYQQLQLKQQQIKLINLELNLIQIKQLDQEYSDMNQKMFSICNNMQTSYISSYQIGLLQDIQMKMADNRKQLFSLFFNIL	'Parthenium sp.' phyllody phytoplasma	0.277	155	25	7	21	9	1	0	Effector
A0A7S7JLN4	MHLKKIFQKFIIIIIFTLGLIILMINNKFNEQESWFDYKDSQNSHNNQEELHNNQEELHNNQEELTILESKSGFGSKNHFSYGINKIKITSARFNNIKDYILENTDNIPDDLTSREMYEINSIRNKYKQNYQFLKIKILY	'Parthenium sp.' phyllody phytoplasma	0.1622	140	19	14	12	10	0	1	Effector
A0A7S7JLS8	MIIGAMAFIFSNHSESSFMPFNSKENLTSGTILPEDPKLKINNDSLILPEENDDDLKYQFASISDNNVNFPELKDEEIASVLSRKSSLLSDINSTNEMQSNIDEIESKTKSNFKFSSLFKPFRNIKKNLKN	'Parthenium sp.' phyllody phytoplasma	0.1707	131	16	13	12	20	0	0	Effector
A0A9K3VMQ3	MINKKNHHCTSKNQSPLSSWESAKETLDYYEAFKIKKLFSTRLKRSAEEQLIPKIKTTATRLEKIKNYIFSEPINPALLPTDLLEKEKEEINKLKKNWGLSLGYLNEDKDKFISEELKKCDEYQSQLNILLKIKSFEQQKLVLEEQLETKAKELDRKTNKAEIKKLQDEISEIVGEIGKINVEFQNLEATRIMYQNMLTRAENYKKILEEQYEIDKKKYKDSIIYKLNSLYEISSAEG	'Parthenium sp.' phyllody phytoplasma	0.2222	238	15	38	28	17	2	2	Effector
A0A9K3SU16	MKIYNPNNIIMAAPSQEEIIQGTRIVNVTVSNINVLKTHASFAQYFDFNQTCPCYNSTVAEFCIMWKIKNPPTNLLGVFFDESTRDDEDDKYSLEELKYMANNSVNMFIFWEYKEK	'Parthenium sp.' phyllody phytoplasma	0.2342	116	13	8	5	7	3	2	Effector
A0A9K3WSF3	MKLNSTKIKINIIFNLICLCIIFLLLILIHNRKSNLVYAGQIYSEVKKTDSSEILFDASEKKIEILRAKIDNLSIKKTEISKEIDMIKQALLSNLKIKNKSNINVSQNFLRFQKSLLTNKLYTLKQNINEINLEQIELESKLKKIILLKK	'Parthenium sp.' phyllody phytoplasma	0.2029	150	15	24	24	13	2	0	Effector
A0A9K3STK3	MKQSNFFQKKGVFIFLLTILGLVCCYFYFENQKETSLVSESESTTEPLFSEETPTLPRPKRSVKEPPIPQINTTAARLEQIKNYLFTEPANLSLLSIDLSEQEQEEIKKLKNSWGLYLGFLNRKKGVISKEQNKCDEYHSHLNLISPQIQSFEQQKLALEAQLEKKLPEVDRSKIDRKTNEAKIKKLQTEISEIVGEIGKINVEIKNLEATQRKYQDMLTRAEKAKKESEETYEKSEKEYINSIISKLNSLYEISSAEG	'Parthenium sp.' phyllody phytoplasma	0.2115	259	14	31	28	24	3	1	Effector
A0A9K3Y687	MMKQSNFFQKKGVFIFLLTILGLVCCYFYFENQKETSLVSESESTTEPLFSEETPTLPRPKRSVKEPPIPQINTTAARLEQIKNYLFTEPANLSLLSIDLSEQEQEEIKKLKNSWGLYLGFLNRKKGVISKEQNKCDEYHSHLNLISPQIQSFEQQKLALEAQLEKKLPEVDRSKIDRKTNEAKIKKLQTEISEIVGEIGKINVEIKNLEATQRKYQDMLTRAEKAKKESEETYEKSEKEYINSIISKLNSLYEISSAEG	'Parthenium sp.' phyllody phytoplasma	0.2632	260	14	31	28	24	3	1	Effector
A0A9K3WSS7	MNFKFTKIQIKKINMICLFIIFLALIFINNQKSYIVYAGSNYSTIKRTESSEILFDCLETKIEILRDKIDQFSRKKNELLKEIDTVDKELLSLNLKIKNKSHFNVSKSFLKYQISCLKSKKNNLKTNLYDLHLEITELELKLRKKLDLLTKK	'Parthenium sp.' phyllody phytoplasma	0.2157	152	12	26	24	12	3	0	Effector
A0A9K3WT06	MQKYFIKIMFILLLGITIIIMINKKNHHCTSKNQSPLSSWESAKETLDYYEAFKIKKLFSTRLKRSAEEQLIPKIKTTATRLEKIKNYIFSEPINPALLPTDLLEKEKEEINKLKKNWGLSLGYLNEDKDKFISEELKKCDEYQSQLNILLKIKSFEQQKLVLEEQLETKAKELDRKTNKAEIKKLQDEISEIVGEIGKINVEFQNLEATRIMYQNMLTRAENYKKILEEQYEIDKKKYKDSIIYKLNSLYEISSAEG	'Parthenium sp.' phyllody phytoplasma	0.5658	258	15	40	31	17	2	2	Effector
A0A9K3WST2	MRSLWYLTFLFIVLNMYNYQNVVVAMPPREEFIGQTRIVHVSIGNIDILKQHAVFNKYFDWSLQSARYNEDLQDFSMIWKIKDPDPNLLGVFFDGGIRHGQDDTYNLQELKHMGNGANNMYCIFLKNN	'Parthenium sp.' phyllody phytoplasma	0.2556	128	13	6	12	5	1	3	Effector
U4KLK2	MKTYELQILDFKKVRMLGKKVLVKMGSNAKKHWQEYLNDGSNQLLQENENRVSPKGDCIGFMGGYNPQTKTFIEMPGVFVKPDTIVPDGFDYIDIPDCNMAVLWITAENPNLEKGAHNLLLKHLKETNYEADYSLGFSAEYYTSVGYVNLDKNNPIYKFGYFLPCKEKLV	Alteracholeplasma palmae (strain ATCC 49389 / J233) (Acholeplasma palmae)	0	170	14	18	17	6	3	2	Effector
U4KLC7	MTRKTLNIKERRFLGSWVEATFIEAMEGKIRKALDSYVSDKNIGDEFFGLSSHHKVDGFKYFIGSLDNSGNLVLPESDYLIVDEVSDAYSIYTELMKEKISFKAFFDASLENDHIPIKIEKYRITKDGYVLFSIEVPVKL	Alteracholeplasma palmae (strain ATCC 49389 / J233) (Acholeplasma palmae)	0	140	5	14	12	13	0	1	Effector
U4KJX6	MVKLHNLRGIEISKFKAISSGEKTFEELFGKGGFSEWVEQHQRFIQNHIYEPVSFLWHEGDKETWGRGKNVLIYAVKDEVTPTDVKPYELIEFPGGLFLVGTGDETEGGDLNQTIDCMMSWIKQSDVFDYGDFPKSGMCNMPNPDGAFDQALGVSQQQVYLPLKYKEK	Alteracholeplasma palmae (strain ATCC 49389 / J233) (Acholeplasma palmae)	0.1325	168	6	14	12	9	2	4	Effector
Q2NK84	MKKTIKKNIIIFICFTLLVFCFFIIFCKNSKNEKPFTCFKNPNNSLQLTRKLAYLGLNQFVNGLESDQFKEQYLLIFNGDSSFFENDVLSCSLKTASTPLIQGTLDFLSQQLKRKFNLIINDKHLLSSFLFDNNPIDLEMKNNNYHFFIQKPEDTKGDGYCFFHALIFLLKKKNLFSENIIKDSFDKIDLSKNNYNIIDKIKKLKEKS	Aster yellows witches'-broom phytoplasma (strain AYWB)	0.2353	208	22	28	27	15	6	0	Effector
Q2NJE7	MNIKLFNQKNKLVSFLCFISSIILILLLLLILSLQKRHSICKPSEKIQLTNNQNQNPNQQNLVKTSNLEKSKSQETKQIQPQIKNPKQIIEEKDTLPLYIQTVNGKKHYHFILPDSEFMQDGTLKNSETHVYMENLKPTLMHQMICKIQPQYDGWIACFPSFNGQDLSGVFLYSVMTGIKTPPLDLVGIYFESPFDNFDVGDWNKYTLDDILQMKNESQNIYFFWRTPKMTNIYKKYHLFKPGKEKYHPTFNKPRSPQNSLMLTEEFIDKFIPNSPSKNLKETKK	Aster yellows witches'-broom phytoplasma (strain AYWB)	0.26	285	24	33	30	20	4	3	Effector
Q6JKN2	MLPDSKNKNFYFLVLILLLIIAIMAAYNFLYLKKIDENKDIKVIDEVTEVKEIEKKVPISCIKCDGEKSKETQENIVNIKGNIQEINGVKHHHYIVPDSEFDDEGIITNACNQLFKFFGGWKPTLMHSFIKKLNPNYNGWIGDFPSFNENIDKPIGTQIKYPPMDLVGIYFDKGTRFISDKGVESWNTYTFDEVVKATNGAENVYYFWRTPNMFNKFFKNKFKHQEYKRVKIDPNDPHLNHPHCPLFAKVLTQEDIDNL	Beet leafhopper transmitted virescence phytoplasma	0.2273	259	24	30	16	8	4	4	Effector
A0A1S9M1J1	MFKLSSQFKIISICLFVVVGLFLINNKKLYAFPGINLDVRKNQIQGEINSLVIEMSNIFNDMSIDSSTRLNRMTITNDRINILFNELEMINQQINIRDMLNLQRNNNENRQNHTRRI	Candidatus Phytoplasma aurantifolia	0.2188	117	19	5	12	8	1	0	Effector
A0A1S9M2Z9	MFVLMIVGSVTTFVFFHPIHSSFMINDSKENLTSGNISSEVPQLENLMSSEDKNNHDVDYVSIKIDNKQENQDVENHAAIKDYNNDIFEGLRKSDVESIMGQSENSEVLSVTTEDKKPTNIAKYKHKSKISLLFKPFRNIKKNLKKINQLNSTNNFVTHNLDSEPDYAFIKKNKNSEKNINVPIICPAIEFCQVMETPKAIV	Candidatus Phytoplasma aurantifolia	0.2	202	24	22	11	20	2	0	Effector
A0A1S9LZ16	MIKFYFYLYILFIFVKISTLNNIIIAAPPQDEFINGTRIVNVIVASGDILKKHNLFKQYFDWSCEYPSYNSELEEFGMIWKIKNPPENLLGVFFDAGNRDDADNKYTLEELKYIANKAKNMYIFWRYKEK	Candidatus Phytoplasma aurantifolia	0.2222	130	12	13	10	5	1	3	Effector
A0A1S9M013	MLAKYLKNKIIKLLIVVFILFLSLNLFLIIFFKLDNNFKKFKLFSSNKSINNSEKLKINIMDVISSSININKLSDDEKKLLSIDSNLSSQEIILILKERLLNQFQVNNQIHKAYVLAQEDAHIKIDKNLHYYVLPQDEIIIMKNLIYTNPTFSEKETIIILSDRLLTKYRINQKRLEKYGLFLKKQLNPIRISDNSLNIKITLKNKQIPNILFYIMIIKTVLAETQYRTTILNEQLKDDQKLQILENDFMNNRDWIQSENNKLLFINPNLSPKEKILILKEKIKNQFQQRNKLAKYYELIYHKGLPTFPKPKSPRYIPDEDSFLQNIFDQHLHKTESKIIEDLQISLLKEYEQKKLLLNLCNSVLDNKIFPEIYYTGTSNISEKDINEMTEILSDPWYI…	Candidatus Phytoplasma aurantifolia	0.1486	504	44	66	68	30	1	2	Effector
A0A1S9M008	MLKKIQLKFIIFLLLNLVIVNFFGLFINKQGNLSNSKLSNVKAFFDINWNFFSKPKTITKYPKLITEQSLQKKITEYEQHIQNLTQTINDICNKTHLFLVQIKLQEIKNQMTDLNNKKTKLSLTTSNYSIILDKINIDLENLKNRISLIQSQENSNNPKNSDSSEKEFFINTQNR	Candidatus Phytoplasma aurantifolia	0.26	175	24	22	22	14	1	1	Effector
A0A1S9M1P0	MNIEKIFNYKLIVCIINLFLISGMFLAVFSNYQTQTNSKEVIFSSKNNIFNKYSDDSKMLIPEKNFFSIDQEFFKSIETDIRKKIFKKNGELVGIKLYENEDDNFPIVFEEYNEKNFITQITKYNKENGFKLYTIKYIYDKSKVINKIKEIYNDLQKISQIEIYNVNYSCDKSNDYLSKVTKYNDFNSILYTVDYIYNKLQKVSRINKDIYNDSGKRLFTEIYHIIDGSEMPVLIKKIRYSLKNGIIESIFHYFNAKDNKKKIVKQFFVGGILDKTITEETDLLANKKTKIVYQDRNDEIFKINKYDLNQHMWCSEVYKNKVIVDRRCEDKKDKSNRSYKHYQKLQNKEDLALIDEQFIDEQNNVWNKEYIYKANGELDHVIAKKIYY	Candidatus Phytoplasma aurantifolia	0.1039	388	40	56	23	23	4	2	Effector
A0A1S9M0W3	MNKPLNFNKKFIGLSLLIFSVLVIPLIMFCIGIFENSDEIDLLENESILTQSQQDKVRKFGRLI	Candidatus Phytoplasma aurantifolia	0.2	64	5	5	10	5	1	0	Effector
A0A1S9M2U0	MTLNFNKNISIFRLFFLFLLFIFLVTKFLIRQNNINNHYHLYQILKNDTIEKSQNKTETNNISSNVSKFKINLKDFETIQIYIFSDNCYNKLSIINKINNEEKKIIEKIKNKWNFALEVNIKRENNIHDLDMKINHLIKNQKLIQSQIEELNKNFFKNENNINEKKLLYQQKINVLQERYKLNQERCQKFERIKFSFIEHSKRILEAQKHKLKAELYSFYELI	Candidatus Phytoplasma aurantifolia	0.1818	223	33	31	24	11	2	1	Effector
A0A1S9LYK0	MVKIKNNLLLLLNAFFAFTLLGLFLITNNQQVMAAPNEEFVGNMRIVNITVSNINILKNHATFKQYFDFKINRPCYNGNIATFAIMWKIKNPPRNLLGVFFDNGTRDDEDDKYNLEDLKKMGNGASNMYIFWQYEQK	Candidatus Phytoplasma aurantifolia	0.3212	137	20	11	14	2	1	2	Effector
A0A1S9M358	MYKKKQIIKRKKIFLLSILVTSFLFFVVFFCMGKILGHIEQQHEEVVLDVGQALENNLESGQKNLISNITGSAEKCVSDVTEHIKFKVDGISEYFQKNLDNLKEHCQMRLDQCIDHLEQHTKEHFSQTFNQVLNPQIEQNLISLKSNILNIFSNYLFDFFKFKINWNFLNFLPSFLFPKSNTLVNNNVNNDLNNDLSYELRDIEVK	Candidatus Phytoplasma aurantifolia	0	206	23	19	25	14	4	1	Effector
A0A1S9M4Q7	NPVMAMDPNLPGTSENQPPQQNLTIEENIINLKQKIYDNAKKITKINKILRGSFNITDDQKEILLKLQENSKQLVNNQKEQIKAYQILLKNLNDDNN	Candidatus Phytoplasma aurantifolia	0.1707	97	16	12	11	3	0	0	Effector
B1Q3E8	MQNVKTKKSLVSKLVALFAVATIVALLSVNSVFGAFGDAKLPSGNLYIVLKVADKDDSTKRMAAIKEVDGLKDASENDFSYAWNTENTELTLTSKEGGKFVTGTVKLTRKDSKEEVTAAVKAATPFYKKWWFWTIIVAFVAIVGGVAFYFVKKRQQA	Candidatus Phytoplasma japonicum	0.233	157	6	20	12	10	0	4	Amp
A0A3G3BKD1	MQNKNVQKSLITKLTTLFAVIALSLGLVVSSSVFAASKDLSTLNDTEKKVTLKADDAADKTKVVAELKKVDSLKEITESDIDSVTPSPDKSKITVKAKADSSKVSGQVDLTRVDPSSDAAKAAAEKWYAKWWVWALVAAVVATIIGVSYYVVKKRQQK	Candidatus Phytoplasma meliae	0.2308	158	3	23	13	18	0	4	Amp
A0A139JR49	MNKSKKITILFPIFLFLIVMFFIFLFLLLFLFPFYFIPSSYRNFSYPTVSSSQKISQTTTKNNEAIFKLKKENYQKEIDLSSLLYFRNLQNTKTKNKIIAFFKKNNIFFDNLNNNQIKALEKLIYQFKQISNTSILDSDFQIKISKLREEVLNFKKELNISDSQPHHYPSDVISSTDSQNSSSQDKSFDWNYISNPAVCLINNLYENSKKALNIITPLTLTNSFINNSNII	Candidatus Phytoplasma oryzae	0.3793	231	28	24	25	28	1	1	Effector
A0A2S8NT44	FHLHFNPVRKTLSLYQDKHNNDKAKEATYNKRTSDDW	Candidatus Phytoplasma phoenicium	0	37	4	5	3	2	0	1	Effector
A0A2S8NTY9	LGIGITYYYLSPQAKIISQKTVFPEVLKEQNVLLNNNFQPVSSEIDRFYYQSIIPQKKEHLDHLEVYDVFLGENTGMKEVLGWLKYSFPQKTFNHHFSYALYNADEKNNQVSFDFRIKEPPPQNFLLAYFEGGQRDGQNDKYTLDDLKNMGNGASRLYFFWSLNKPYHPQPTPFIPENYHLEIIYDKGTNFGGPSYLFIDKIVVKDLQKEKIVGIYPINQKVEEPFVIFGRQMMPKYRVI	Candidatus Phytoplasma phoenicium	0.25	240	17	20	20	11	0	2	Effector
A0A0L0MJB1	MEDNKNSYSILFIFVFPIFLIIVILSACSLFYLKAKNKIVEKPVYLEKIVKKPIIVEK	Candidatus Phytoplasma phoenicium	0.3682	58	3	9	6	4	1	0	Effector
A0A0L0MKA6	MEIWQKKSTYLQLIILIFMIFTTWNFLYNNYWKEQINNPYNQHLKDIHQIEKKVDKFKQQNRNNFQKINEKIDNLLLYTQTKQI	Candidatus Phytoplasma phoenicium	0	84	11	11	8	1	0	3	Effector
A0A2S8NT52	MFILHLTLKKIIIGMIIPFIMFYVIKKKNQKSVKQIKPKKILIIYYIVIFILYIVTIIVRLIHQNNLNESKPIPAPQIETKAEYYYKKNEYGHDITSTKYALTEEDKPYSNDEGKLMLANVGEISKPQIERKYTFFGFNGLDQCRYKDKVPKDLPLFIREPFNHWRYTGKMKPYNDSFMGRNKDYFTFEFDIVVSNRDSKFYPYGFVKQDETIEMDYKGPKYLLEKDEDFYINTVECPLQEEKKFETKHQNYYLHFNPVKKYITLYTVKKNDKEN	Candidatus Phytoplasma phoenicium	0.2977	275	17	38	18	8	2	1	Effector
A0A2S8NU71	MFKLKNQFKIISFCLFVLLGMLFINNNKKIYAFPAIDLDARRQELEADMIDLRTRLDNVFFDRSIDSETRMRRMVAIENTMNETQDQLFSINRQIIERDRFNQENLNNSNQNNNSRRR	Candidatus Phytoplasma phoenicium	0.4	118	16	5	11	6	1	0	Effector
A0A2S8NU52	MFKLQNQFKIISICLFILLGLFINNNKNLYAYPGIDLEVRQHQLEEEINSLMLELTNVFSDTNLESQTRFHRIVVISNILNIVRNELEIINQKIIERNQYTIYKDKITKINKTNNRKS	Candidatus Phytoplasma phoenicium	0.25	118	16	9	14	6	1	0	Effector
A0A2S8NUU7	MFKLQNQFKIISISLFIFLGLLFIFNNNQVIASPNEELVGNMRIVNVTFSDINRIKDFQPFLQYFDFTLNGPRYNGNIEEFAMIWKIKNPPHNLLGVFFDNGTRDDEDDKYTLEDLKQMGNGAKNMYIFWQYEQK	Candidatus Phytoplasma phoenicium	0.28	135	16	9	12	4	0	2	Effector
A0A2S8NTF4	MFKLQNQFKIISIYLFIFLGLFLITNNSVMAMNNLNDENSINNEINKLYWERKNLATKISYFHIHHLDDDINLQKELHNLDQTIKNLYQRLSDVNNLKYINKKIWDYSYERNQVAIKILSRSYQDPTMQELIKNHQELVKIIKNLNQKYINLQYKLNK	Candidatus Phytoplasma phoenicium	0.3516	158	23	17	21	8	0	2	Effector
A0A0L0MKB0	MIEKKQKIKIIGWSLWVIGIMIVGFCFVVSLLKDKTEDNPNKVITPPSSSTTVDFIEQLEECQKLLKQTNVTPEYQKILQAIVHKLETKIQRAEEQKAFQAYLSNLSAEILDLEKQLNEQPLSLIKKNTLSGKKLKKEKELIQLKEQKDLFQEKEELQTQVLPNLEEKLKETSLTPQDKTNLTKEKTKWENRLQEIETFLIKIKNQQRIHTLEKLIRQEEEDESLTKLLEEEKNYLSSQI	Candidatus Phytoplasma phoenicium	0	240	11	35	34	13	2	3	Effector
A0A0L0ML33	MITNHKKIIRLILTMVTFIIIFCGFYWRWFKNTTIEIADGNQNIREKIEGKFKFQELKEKLNKKSCKIYTNQRDSQIIYYCHNIKYMIKPKKNEAPFFVEFYSQNNLLNDKWYLDDTFIGTTFKCVTNNHPLYCIEFQKDRWFLQK	Candidatus Phytoplasma phoenicium	0.315	146	13	19	9	3	5	4	Effector
A0A2S8NTH0	MKFIKIKGINYRLIPFLVTTGVLLFCFFLIIAAAYKYHEETMERIEKIEKIDIPKKAREINEQLHQENEELKEEITHLKSAPYELTKDDGTKEYYSLVTHKLLKKIDKDETIWEYHPNNGMLLKKTDKYHTMTEYGSHG	Candidatus Phytoplasma phoenicium	0.375	139	5	19	14	3	1	1	Effector
A0A0L0MK30	MKIQTKNKIFTTLVVFISLFFTIASLCALSNYFAQQKKETIQLMNNFPSFTIKRTGGNNEDKILLTISLLNLN	Candidatus Phytoplasma phoenicium	0.5	73	8	7	10	5	1	0	Effector
A0A2S8NSV1	MLKKLVKINCLFFLMSTIFVMIFFSSSIFSKKISAYNTTDIQKKPSGEILEVKKQKFNAVDCKNFSLMALNKIKMFNLGIAINPDDITKLNDITEKCSDIINAASLNKFKRQISEPETSNTNLVIIVNNLQKVIMKNSIHNRIEINDTFTNWNQYFENCCYILFSSLIECSETYSDDDSESILIFMASQITGMLSDMLIPYILAD	Candidatus Phytoplasma phoenicium	0	205	20	19	18	21	6	1	Effector
A0A2S8NUW3	MNFNQFKKFFILFVSILFVSAILYVSYFYKNQKQKNYQSKKNLFDSLSFNFVQKLAYRGMEQFQKGLSEGNTQYKLIYEADSQLFIEFVTQGTLKTASSPLIQGTIDFISECLNRNIHLYINEKHMFSTSENLLKNCKESVLDLKIRNQDNVHFFVNYYNDTIGDGYCFFHALDNVLKNIIPNWQEKIFI	Candidatus Phytoplasma phoenicium	0.385	190	19	17	19	14	3	1	Effector
A0A2S8NUD4	MNLNLKNINYTSIFLFIIFLLFIFINYFIKSNLVYAGQVYSEIKKTDSSEQLFDSSETKIELLRSKIDDLSRKRNSILKEINRIEETLSFHLEIRNKKNPNTSERNSSFLKFQISFLKEKKSYLKKNLYEINLEQIDLEIKLRKKIYSLKK	Candidatus Phytoplasma phoenicium	0	151	14	21	21	17	0	0	Effector
A0A2S8NTJ3	MYLIKKLSKYIPYIFYISIMTLSNVIIIKNFLFYQYQKQIENLNQMHYNKIKNLESNITNLESNITNLEISINKQPIKNLEISKETQKQTNINEKQLTLIKN	Candidatus Phytoplasma phoenicium	0	102	15	13	11	7	0	0	Effector
A0A559KIZ9	MIIKKEKIIYSSIFAFLFLGIMLINYFYLIPKLVKKEVDELRPILTSNSKNNNNDDIINFCDETSKTIQSYLDLGKETDINNENENDINKIQEKLKKIKEIQEKNQKDVEIANIFDKNIKQFQQQLEIEEKGPNVQACSDLKQIILLLENFQLCCKEIEDMKKNLDKKYSIFNKEENKKEREEEEKDLDEGRKYLNAFANILDIFANSTKSIKKLTSSSLVEEHLKKELNELNDEFTKYAKKSFNFVNLYRNNKIPKLFSSFINKK	Candidatus Phytoplasma pini	0.2684	266	30	42	27	16	4	0	Effector
A0A559KJD9	MKIMDEKENNKNILNLRFLFFLVFLVLIIVGFCYLFIKNFNYYENNKYNNKDTYTYGLFFPENSTNFLIKNINFCKDLYTKIHKHNSVNGKKILTINDLFENLHFSDLCCSRIGSQTNNLNKSNNVMYNSLANYKQITINLCYFSDIVKNLAEDIEKFLSKEYPKNIQINIKKILKNDDLFSNNLENNNNIFLLKLFSTSTKSDYSKIEFLLNLFKDDDVISLDISKNLFNEEEKKLLSKLQNIFNSKNWNNIKLNETQKELRKAVHDDIKQLIRISNNKDINDPKLSMKIKQIKNLFIAIDGDTLGNGINQLILSIPKYNDNYISFIDLIKKLCSQIITSIHDSFLNDKFSVIPLKEIEVDSSKKDFYDFNNYLKLLLDEKLKDERIQKIINEFVEPL…	Candidatus Phytoplasma pini	0.34	517	71	63	61	38	7	2	Effector
A0A559KJH6	MKKNFTKNIFKIAIFLIIILFLSITFVLLSSSEKKKESKQVKPKNRSSQISSFSVNHLKKETQVEKFRYDFFVKDEKEINLILHNLNIKDTITSIDKKKPFFNDYENNKHYFNLKNNSDGLLYVHLKPNKNSLHSQYLRKDDKYTLQDLLEEKRSFENIFVFWDIEKSNTFDISIHHVITDLPFNKDKKQFIKEYLEKQKIFLSLEQIHLNCYNPSINKGIVEPLGKFAIEEMKPTAIYYDDGIRFINNNNKERTNTEFYQRHNGAKNIYVFKLKNKKQNEIQKNEYQVENLEEMKKILNQKNIYPKNINIVNPSFNKNNIPEDSNIEWYIKNPSESLFGVYFKYFENKGMPSIENFQYSLEDLLKNNDIIEEAYIFYKKRIPSGIKLFEKNKKYYPKD…	Candidatus Phytoplasma pini	0.3809	512	57	72	35	34	1	3	Effector
A0A0M1N027	MKDDLGEQAAELTDETAKAAVQKQYSNLNMDEVTVKVDAANKQVTVSADANSKVYAGTATVKYTVKAATSDKPWYKSVVLLVSVGIAFVVAAVGVVYYFNKNKNLKIIY	Candidatus Phytoplasma pruni	0.2766	109	7	13	6	6	0	1	Amp
A0A0M1N0R4	MAILMVVFSVIYISAFAAEENILESEEPISEEIFSAETPLNIESEEKIAENSDLTTPKDYQIAPESKSKTGSSADLLDKLQNSPIFHKIQDKTIALGQNFLDEMQKKILNPSKPDKNNVVEGKKAPSRKTPTSNKVNRLFQTIYRKTN	Candidatus Phytoplasma pruni	0.2353	148	11	16	11	15	0	0	Effector
A0A851HL65	MKKLQKQKSLTVKLFTIILLTLPLITLVALTATVLERNNISITQIFKIGQPNKTEMNENDAKKLFKVLDLNPTENEIEWANSKNAIDFAPKTYYLVDTFSSLKKKEIIKRYQVSFEDEVYTDTDLFAKIGQITNFFIERSENGQTQKNTVAGAMQANKIEWILEKPNQTNTNTTDRQNVTQEEENVKKAILLYGTKTNNSDRTRTVNSLTTDQLKTHEKTKHLTISEIKDNFDKLKGINNTYKEQYKNDKKMILEITFTLNQDNIKKLFDESNTQTAPFIKTETVNGQTKKYIDLTTVFEVYTG	Candidatus Phytoplasma pruni	0.2532	304	29	38	27	11	0	2	Effector
A0A851HJH2	MLNIKTIFINLLVGILFWTPILLFYQHQMIKSFTPVNKNIPIEPIALDFDPQKMINSHKLPKSKIWKNYLKGVSAVETADQYVKNFVLVNKESNIKYNVLEKKLIIKNIDDLIDKKIYFARTYIKFNPGFYKFRDSFSIGIHFYLHLTKSAQNCYLIMLEPIADTLL	Candidatus Phytoplasma pruni	0.2727	167	13	20	19	8	1	2	Effector
A0A0M1N0D1	MNFFKKHWIVILIITVLVISFIIGIFEGLYETKQEPKSLSNYHEELDNNPKINNPPRTKREIETPKSKIKITKEKFDIIKNYILSENENEVLTINDLSQEEKKEIDKIKNSWKLCLELQKDRQKIILEYQKECDGYNKQISELNPQDGFDKIKIKSLTEQLQRAEKEKNRLQKNYDKMLFEYKNEFSIKLNS	Candidatus Phytoplasma pruni	0.4166	192	17	30	18	11	2	2	Effector
A0A0M1MZW4	MNKNKNIILFKIIILFLLFSSYLIYKFIQDRQINISEETQTSLEQQNIQLSNDLTKHKQDIKNKYDDWAKQNNALTQRLSALQKDKENLEKQNIQLKSEKKELMSLQVDLYSQIETLKTESSRLKDEKVTLFKQKLDFQTRHDLLEYDLADLKLEKNDLEARNKQLNVDKEILNTEKETLKTEKINLKKQIANLNAEKEIFILKKQELQKQIENLEKQKTSLNDEKQKLNDEKIALESRNTQLSAEKETLIAEKNQLESQITTLIVEKESFTLQKQGLQNQIESLERDKNQLNDDKRALTSQQAENKNKIDVLESDKEKLITERATLTAEKTQSDSQIAALIADKEALNVQKNSLQAKIENLEKETNKLNKEITDLKKAKTKLEKQNKTLSDDLRKEKQ…	Candidatus Phytoplasma pruni	0.3252	411	36	68	58	23	0	1	Effector
A0A851HIA3	MNLKKLIKSRPFIISTLLTSLMLLSLFIWCVLIHRITIEKPIKETLTKGEQKLSDEKDYLKALHQWKDQCDFKPHTKYTANEVREKLGRSDGKIYTNSQDYKGIVLKGIIIDDEIKPSADGSIQYKYKKGWFLDDWYFNDILVGTTDDAFLQSIYSYGYYSNTPPPQPPTTVSS	Candidatus Phytoplasma pruni	0.3372	174	5	20	18	14	2	4	Effector
A0A851HHG1	MNLLKNKIFMNFVKYITIILISFIFVRLYVNHSKKEYFKKHPLPPHYSLTDSELISQTKEEYEKNVQKWKDHCYFAETQKANYITSAERIRDILGKQDKTLYDIEGNEHTYKYKKGFFKDEWYLDNILLGNSCNEDSIGWKLYYLNDTRPPQPPRGVAKPTEIAPKPESQEWNRFTGKYFNTTTYNFDGYI	Candidatus Phytoplasma pruni	0.3	191	14	22	14	9	2	4	Effector
A0A851HC45	MNYKEFFRKNKKIITIVGIGLLAILLIVSVVFAVKYFSKDKKDENATSASVTPNTTITPEKTQEEPKKEEKVDESKTIERQLIIEDVNLGINANPFTVNDYAEEHQIFNDSQMDEVIANNRFFDKKDLKTDDSNQDLIAVYFNGGTREEKKSDNQKYTLEELKNLGNGASKMYIFWKRRIIISD	Candidatus Phytoplasma pruni	0.25	184	16	22	11	10	0	1	Effector
A0A851HGI9	MSHKNKKPLAPNAKRMVFMTTLIITILSTTFIIGFNLLAKYCVPVRETLTVPTPQIPNLPTQSEMEQFLKIESIPNNETFTANTIEKREYLTKTHKTYLETKTTILTNNGTITKKYRVYFDPRVRAEATIKAAVESSITQQIANPTTNTHAQANYLNTNFTWENNDDKLFSNPNPNTPSKTLILTATYQLDYERLKKDPLYTTALNQGISNLTSSLTFSVKSTTPDETIIDAPPRRPHPNPYYLPS	Candidatus Phytoplasma pruni	0.2233	246	22	18	22	14	1	1	Effector
A0A851HJ54	MSIIKFNNRYYKLIPFIVILLILSGFIIVLISSAYNLHVEQQNIKNVKPEPQIIYVDKPSSETTQSQPFFLTQEQLPLLNDEFLQILNEEQVKNILPETIPKMKWVLLKTKTHFLTKEQLQYLSQYSPKFLGDYIPYNFFNHHESFVKMSPENLPLIPPLGLSQVKPQTYNQLSKEQIQAFTTEQLKTIFDFNYSELTPAFYKAVGSQKAMDLIKTTDVKNEAKIAMQKYYTINTNL	Candidatus Phytoplasma pruni	0.375	237	16	22	28	15	0	1	Effector
A0A851HIZ1	MSRLKQYLKTHPKKLTFFIILSLALLSAIIITATYNLIPYFRTAKTETFPIPVQAPQHELTYNGTTIINLTQQQAFDTAIADALSNTHPTQ	Candidatus Phytoplasma pruni	0.2083	91	4	5	11	4	0	0	Effector
A0A851HH11	MSRLKQYLKTSPKKFTLFAILSITLLSVIIITAYNLIPYFLTTKTEKSSIPIQANQHELTHNDQTIINSTQQQTFEAINDDTTQNPRPGDPNSDKINLTPYLTYQDQDGNTIREYRFFDNMEPTQKDIRGRENFFNRTDFQNMIDKYKLNAFPLKWNTGRENLFNLEFNEQQKVKMKYGWPVSQANYQLIQTNQPYNTIESLTKDIQGENGFWNKSDSCFNTTENIDIQTIINDESYKGKTPYIRFITKNLDLEFDWLSLIIARFNSYLPNVAKAQQTYLKTEYWAEKGLLANAEVQRLRDNIKQVNDIVQKIRSSNQRNEEQIQKATDSALPAKNDIQNLEEKIRSKSSTNRYNLDSALERVDLVKQIPELQQAIKAKAFIKQANEFIQQTRSKISEN…	Candidatus Phytoplasma pruni	0.4392	531	51	45	45	30	2	5	Effector
A0A851HIB5	MTNKFNSKKLIIGSLSIIAILMVVFSVLYINAFAAEETTTEEANTEEIVSENTPLSIETEEQMTESSDLTPPKYSPTTPEGKIKTDSSADLLDKFQNSPLFHKIQDKTIALGQNVLDQMKQKILNPSKPSKTNIVEAKKEPLHKTSLAHKSNKLSQSMDKNKNLFLKIGQ	Candidatus Phytoplasma pruni	0.2273	170	12	21	17	18	0	0	Effector
A0A851HAP6	TGLFQDRQMKFSEETQTSLEQQNIQLSNDLTKQKKDIKNKYDDWVKKNNALTEQLSILQKDKENLEKQNKQLKSEKEEMMSLQVELHSQIETLKTESSQLKEEKATLLDQKVDFETRNVSLEHDLTGLQSDKKVLETQNQQLNLDKEVLNTEKETLKNEKINLEKQITDLNDEKEILLLEKQELEKQIENLEKQNTGLKDEKQGLKDEKTTLENQNTQLNAEKETLITEKNQLENQITTLIAEKESFILQKQGLTNQIETLERDKNQLNDDKRALTSQQEEKKNQIETLEKDKEKLITERDALAAEKTQLDNQITTLIAEKEALNTQKNILETKIDTLEKETTKLNKEITDLKKAKTTLEKQNKTLTDDLRKEKQKKTSTPNKKKKP	Candidatus Phytoplasma pruni	0.3174	387	31	64	55	14	0	1	Effector
D5GSR4	METNQQKMLIAVGSIFGVLVLYFVLAWSMSFWPFSVELNKQEIFSSELNLTLDSNSLGESIFSKAVAERKKNLQEQVTKKVESFITSANKLLTTEPDAQDKKTLFNQAKESLGKIKTANKTLTDYNEEFFAESLRTASTATLKTDIKKVADEIVIFKENIKNAFNLN	Candidatus Phytoplasma prunorum	0.4529	167	13	19	18	15	0	2	Imp
A0A5N5XT77	MFNIKKNVTFLYLISLVLTSLLVINFFSSSPIYALKSEEEESEKIFENFAINDQNDRKRDILSKTLYDMKTKLKQTHKVSNSIIENFYTYLLSDKLGIQEWDENPRSRQDIFDAKFIKSEIDDYTIHTKSTVETDCQVMLEFAMKKLYDEANDNDDSNIKGLIDMIRGTDNKINYNSILKDSINTLYW	Candidatus Phytoplasma sacchari	0.3548	188	16	19	18	17	1	2	Effector
A0A421NY12	MEEYLAKKTTFLTQEISIRVDEKLQGREFSVYEYFNLPIEKKNAQIKKQGYWDFEDLGERVDYQSFVRKTYPLWQEFVYNIKTKVQEEISTKRAKIQKHEESLNHLETIHQNNLAMIKIPKTPQTTQPQTPHTPTTNGTLAPKPEETDTTLLKPTNKPNETHNPNKQKADLEIKEEEKLIIIIELVIVKGFNPCHPIRPILLHVG	Candidatus Phytoplasma solani	0.32	205	12	23	17	5	1	2	Effector
A0A421NV12	MFKLQNQFKIISFCLYSFLGLIFIFNNKQMMAMNNNNNNVGTSENVYNSLEEYRNYQNLLVSQQTKTQEVINAFEHQVSETEKKLLFDQLELIHQQIITTQQRHLDIQQQITINLILNNEITELERIHSLLMQEMTTIINNIPLYASEEQINLLRNTQIRINQNQENINTILEQIRNQSPMPRINLSRNRSSQRR	Candidatus Phytoplasma solani	0.2321	195	28	6	22	12	1	0	Effector
A0A421NVC0	MFNFYKKLSTSQTRILLFLSFGLLVVMCFLVFGAMKLTEEKPFSTKIEKKTPLASISNYSSIFKVTDKSKEKELTTKDKNQYTDNMRTPFPADLVGDSTFENDKHAHVVQSVIEVKLDPKKQNGTPADMNDFINRYKGTTPHLGITPRVLLKKEKNATDTNVNDLELSNLQATVMTKDRNNQNEKPENIMVLDLRTNRKKKSNKNNVIEDVFEINNEKAFPKIPFDTKDSKAIITQTLSEWNDYSKKEENKDPVLNPPKIIDTLKILNDNNSPETLQAVDIWCLVSLQQLVALDDDVKIALWKNAKDIKDESDTNNTQYLEDFNKNYENEITLSIDFYLSDDKGNPQTGTKILDTANIKLENKDYQRPPVESGPTGGRKIKITNTKPQVRTKEKTIIQQ…	Candidatus Phytoplasma solani	0	401	38	50	35	23	2	3	Effector
A0A421NV68	MHFTNLPKKSRIIAITIIALSLFLTRFCVYPHFRAKKATKTNEQTKLIEVSQPNFRVKVLEPYVQYTNTQGDIIREYRLFEGMQPQGKDHTGRTNYFLRQDFYDIMNKYELSIYPTRWTNGRENMNNFEYENGQVKKKHNWYVSKANYQIIQTNQPSNSPALMTRDIEGDNGFWNQSTCFLNSIENQKISNILNSNVKTKTPYIRMITKNLEVSFDWLKLISDEFYYYMPLTAKAQRYTKKAQKYIALAQQHIFDANWYAIEAKDYEDKGPNLTEWAEKYVELAKKYINKSQGIMIELKNVNQPKITCQLTTKTIIDDSRPNTTQKVPYFELSYDLEKLINFINHLDLTNNFHLQKIKEFVNIFAPRN	Candidatus Phytoplasma solani	0.2414	368	35	35	27	16	3	6	Effector
A0A421NUF4	MHLRKKRFFKIIKLFLLSFFISFLFLHNNFFVNAAAKQQLSTFTKSTTETITVTQAETINKTQATLNKFLKQDGSLTLNTDVTITFNANDNKKTTLTATANSKAQSGSSVVFNNVTVEKPQLSTKLTVKELGALDARTQDAVKAAVLSTNANNLTQVDKTKFTITLDTDATQNKATVTHPNFDGDVVVTFSIKEALDKKLTITQLGALDARTQAAIKDAVLTKNTDLKTVEQNKFTITLDTDATQNKAKVKHSDFTGEEEVRCFVFLDNFLF	Candidatus Phytoplasma solani	0.3186	272	21	29	28	13	1	0	Effector
A0A421NUW0	MHLRKKRFFKIIKLFLLSFLFLFLLLHNNIIFADNPSNNPERDNSEEPQTVKPNAGSTGQDIDTTKKTKRRDDGTIESISEFDPNTDRMVMRDPTQEEVEQVSEIIAKEQEEAARQAADRLAKEPKAENQADFQEKVVEETKTEIKEAKKTVETSKPEGNEGISNPTVTEKTSNPTAPNAGTMRCSKTLDTFYFLKIL	Candidatus Phytoplasma solani	0.4411	198	13	20	13	11	1	0	Effector
A0A421NY59	MIFICSLFVLGSLVAITNYFSKRKTEPIQLANEIPIFEVERTGGNNTEKTLLSIPIPNLNKNKYAHLITIDHKAIFYPNGIELGDPLYLKIATRYDTHNTFAKPEQFFNLSIKVAGVEYNDAIRPKMTEKGETKETQRNIKISIEQRDLITNKNPKLDLIIDYELVDSKGNGFGGGSQTIENKIAQTA	Candidatus Phytoplasma solani	0.4052	188	16	17	16	8	1	0	Effector
A0A421NV20	MILDLNFSKRKYASFLILLLLFLASVRCVMAGSFDYSNIRSSPQRNTPVQTIKITNLTTNQTTTHTIPSKNNPFNQVFEKTTKLIEPPKFIYIDVSLDKDKINTNHFCNLFKIQLYNSNKKQTPFQPSNDKPCYIDFKARLFVVPKETSNEPKNEPIEVTECFDINFKFLDDKEKEKTIEKDSDQQNQQKTIKIDKEKNTEGYLFWQSHKLKYSFSEDSYRYSFSRIEYEGTPLSLEVVVNLKNDISLTKEQSQKYQRITKLNQDELQLTLDFDLTDQNHYLYKPEKYLKSFAKCLSLSQPLELWESQEFLKNKPKPNFYYLEHLKNDQKDFYQFFNLEELNKWFNEQKDKLHLESLEKSLNLSKEELNEKLKNLSKEIVVCGQKKLYQPLDLLTYSYS…	Candidatus Phytoplasma solani	0	506	50	63	56	37	6	3	Effector
A0A421NUX0	MKEKKSLKKIIIYGTLILVSLLLVGGFCCWWFGWFNSKPSKESSTQSVKPIDAEKRMQELITDNQAFNNVLTEIENIRYQHYPATYLDLKNQEEEKKGLIEDFKNIIKNYQTKYKNLKDIKEKEKTQKEAEENAAKNKKERLVKELATLQSKEPQKTPKEDEEKEAKNQIAILSYQIKSLEKSKIETKINNARGKLETLQGKIDGLKTQINGITSLEENQQVFKREELNDLQNQKEDKEKQKNDLNSSLTNDEETKKNLESEIKKLQSQLLSNNNNLDEINRNLSNITPNEIGRLVRELETLQSKEEAKTQEENKETAARTQKEKLKAESNYLDKFITFLRNLKYNDDIWKSNEENEDEEQSQIDVVEVFIVHNRSINDVLIKQLINQLQNESKDISFE…	Candidatus Phytoplasma solani	0.3157	733	71	90	70	42	3	7	Effector
A0A421NX97	MKKNIKHQIKELEKEFKTAPVPNLDLSNKPHLQKIRQFVNDFTGSNPTPKELQKSPTQKQSLLLEPYLTYQTHEGDIIREYRLFPNMVPTQKDHAGRTNYFERKDFQDMINQYELASFPTRWTNGRKNFFNLEYENAKLKKKHNWEISKANYNLIQTHQPNNASEMMTKNRKGDNGFWNESNCFLNTIRNIDISDILNSDIKNNTPYIRFLTKNLEVEFDWLNLIACEFFEFMSLTAKVQQYTEETQYYTAKVQESTGWAQEYTEDAREYTVKVQQYTAKAQESTALAQQYIPKAQNSFNQAKETITQLQLTNQPKKITINLTQKTVINYQTNSTKQVPYCEVNYDLFELITFINKLDLSNKPHLQKIRQFVNDFTGKSNKSNTPPTLIQNNDFM	Candidatus Phytoplasma solani	0.2143	395	42	38	31	18	3	5	Effector
A0A421NUF2	MKLIRYKLLPFIITCFVLVIAIIYAGFYFYEYHQKQEDFLKGLQGERGDKGEIGDKGPIGPTGAQGPIGPKGPIGSQGPIGPIGQPISPNSHIEIIKGVNYYHYIVPDSEFDSDGLANNICKYVYINHSQPNLMHQFIKKINPDYNGWICWSSSFNETLKTNTYFTEDLNFPMNAAIVTEIKHPPFDLVGIYFDKGTRFSGHNIRSDWDKYTFDEVIKATNGAENVYCFWRTSKMALAFERYVNMYPLDGYRKLNPELNKPRCPSFAKLLTQEDIDRL	Candidatus Phytoplasma solani	0.4948	278	18	20	18	13	5	4	Effector
A0A421NYW6	MKNKIKKTFYFLFILLFLFAITTQIFTLNAFKENNGNNKEIYFNDYEFVKKIKKLSPKFENNNQLLEKILEYIVEEIKFIFGNFINQPNLKEKLDFIEKYNIISEFNYSVQQTVYDIDKFILVLPGNTTEFRNFDNYLMAKNNKFHGSKNYSWSMWSPSNFFFLSKHYISFLIENFSKLQKQEKKIKKKELKIQKLTNISQSEKEKLQKEINRQKESLKLERNKILSQAKIIEKQEHEIQRQKNQIKSQEEEIEKQINEVKTLKKDIEKKQNELNSNQKLSEQEKEKLQKEISTLQRQFESYRNKNNFLQKDID	Candidatus Phytoplasma solani	0.409	314	34	52	29	20	0	2	Effector
A0A421NXE3	MKNKKQKIQTKNKIFTTLVVFICSLFVLGSLVAITNYFSKRKTEPIQLANEIPTFEVERTGGNNTEKTLLPIPIPNLNKNKYAHLITIDHKAIFYPNGIELGEPLYLKIATRYDTHNTFAKPEQFFNLSIKVAGVEYNDATRPKMAEKGKIDPTHFYFCNIKISIEQRDLITNKNPKLDLIIDYELVDAQGNGFGGGSQTIENKIVQTA	Candidatus Phytoplasma solani	0.4088	209	18	22	17	6	2	0	Effector
A0A421NXA0	MKTKLTKKQKIIIIITTFLLFVVGLFLILKLIHKPTATPPIEKTFTYDNNQTYEQNLENWKNQCYFKAGTTYTAKEIREKLGRSDRTVYCLDDGGVGWYNDYQFNLFSTEEDNFKLHYAYNTGWGWFLDKWYFYLPGTSRPGYNSSSDRGKSLLLGRSGSNFSIRFHIYVDTTPPPTKPNN	Candidatus Phytoplasma solani	0.3333	181	13	16	17	10	2	5	Effector
A0A421NY84	MMRNNKIKIKFKLLFIIIVLLPCILSFNNFVFAVTEIQKLENKNLSKELILKMNPIMTTFLDDDIPMPSFFVNQFNTLDYVGFKQSNDIYDYDYKFIHNYDIEGRLITMQQYNPDGSLKYKFVYVYDEKKLQVINIYLPEEDEEPYFKFVNTHNDEGKLIKIQEFFLGFKGDICIPFYSNENLLFCIKKYSFQEEFKCLYKFTYNSDYQLEKIVKYNDFLLPEEIKKSYISYNKKQEFSEISDFNNYDVKLCTFVNTIE	Candidatus Phytoplasma solani	0.3508	259	23	29	24	12	5	0	Effector
A0A421NUQ4	MNKRNKLNKINKKSVLIVIVSLMILTPILVLAINWFLSHQDTIQHGKVSIGLILKESQIDTKKLVNSSIPNQFLKDDDTREFQVKHKLKLVQKLTSNDLSKLRVKSERKFEVKKDDTLDDNLAKLFHSRLVVDQKIVTDSWDQASLLSFPSFSGTQEQEPELSIMILVCENDLPDVILPENATITMTSTYTITDPNGNPLPKQDPITINTPMPPLRI	Candidatus Phytoplasma solani	0	217	14	22	28	18	1	2	Effector
A0A421NXI0	MNKTKLVYSSSLQKKITQLKVWFFILLIIVFLIFIWIQTKYQYNSKSLSLPNYTSDPTTNSLLISQNQKNPKNKTNKKRWITKQNNNKNNLHNIKKTHFFKPLKKQTLNSPNKINLLKISHNSKKTKILNICQHFPPQLEEQIQDMNIYNIYLGKESNEKKALEWLNTQFREKRFVKNLVYGLYNDQIGQYNYVNFNSRLKGLTPEKLLLVYFDQGLRKNTDRCYSFEALKNLGNGAKNMYIFWQDESPSPEQNFWQNNFYTDLIYEKGSGYDAPAYLNIQNIVLKRIDNNETVATFPVKCQIKAPLSLHNYDLELRAPYYKYKYRGLFWKTRKIKRIQKIELYDKQTGEKRILYYKN	Candidatus Phytoplasma solani	0.4009	358	41	47	40	19	3	7	Effector
A0A421NUQ7	MNLNLKNINYTSIFLFIIFLFFIFINYFIKSNLVYAGQVYSEIKKTDSSEQLFDSSETKIEFLRSKIDDLSRKRNSILKEINRIEETLSFHLKIRSKKNPNVSERNSSFLKFQISFLKEKKSFLKKNLEQINLEQIDLEIQLRKKIYSLKK	Candidatus Phytoplasma solani	0.3888	151	13	21	19	18	0	0	Effector
A0A421NYX9	MNSKHNKTLVIGILIFFVIAIIFGFFFFNSEETFVEETSNNPTEEVISSVVSKPSTDYKMDDLKDKVFNELTNLTQKAIESKQVKTFVDSIPDKLTSSLLRGKKTKI	Candidatus Phytoplasma solani	0.253	107	7	13	8	11	0	0	Effector
A0A421NXH2	MPKIIRKENIIVYFFLFLSVFCCLLCTIQCLEFIYKNKTIKKPLTPSLEETQTKFVLTQKLAYLGLNQFIDGLYKNQFKEKYVNIFRGDGVLFEDKVLNGTLGTASTPLIQGTLDFLAQLLKQKLNLIVNDIHYLSSFNSYNQVIDLKMRNNGGNHFYIHKPQDTQGDGYCFFHAIIFLLKKKSYY	Candidatus Phytoplasma solani	0.385	186	13	19	26	7	5	0	Effector
A0A421NV13	MQFDKSLVVTVLSFLGIGVIGFMVAIKLDWVSLDKEKINDTVGKTVLNDQQENNNKEKINDTAEKTVLNDQQKK	Candidatus Phytoplasma solani	0	74	7	10	7	3	0	1	Effector
A0A421NXL0	MQGNRLRVSQTFIVFNLLVLIFTFFLNNINLFAQRTIKSSDKKKITITNDQNPLNNGVWVKKNGEDFKETQEQLDALNLQDLKKLKDLTLIFPQNKRHIAKFRYYKQNQQLSKEDIIKALNQLIKDNNLSTTIEADDFLIENSAFKEVYYEDDEGEQWEGLFRVEDLMGNSLEFTFTKDILNLDDIIDNTDLGVISIKKDINLEERKNLVYQAIIAKNPNLKDKFLPKDFEFEPQNKTFNYIQNSISQIEHNEYDGELLLEINYQTIKQIKSETFKVYKNILIVISFFGVDFNHFSF	Candidatus Phytoplasma solani	0	297	31	30	33	13	0	2	Effector
A0A421NYK8	MQIKTKNKLFTILVVIICSLFTIAFLNENYKLFF	Candidatus Phytoplasma solani	0.3846	34	3	4	5	1	1	0	Effector
A0A421NXD0	MQKQTHFNKYFKSLLFFITTLVLFNFYNFKVYAFNPNDYEINYNTKHYEQTWKNEEGHAFSDNARVFYNIPGIKMMPCKSYQEFANRNQLTKDVFTIGLGFVPGIGQFVSGVDAFADYTGFYDHNINCTDSQIAILNDLVHYYLKDEPGKGVFLFDLNDLNKIKGVDISFCDCEMMSVNVLGSFLDSLEKVFLKEDDDSDFENNNNLEQNSQIIIEKKIKREIKRQLIKKINKKIGHAIARKTWKKAAKKTIGKTLGRFFVPGLFNVLDKIEAKTEAESDIKKRCTFNITNNEFEKTIGFAIHFITEDNISIYEIRQDKNQEKKSYLINTFNLQDCTHMLVNLIQVKQNGEPRNVNVYCGVKTNKHK	Candidatus Phytoplasma solani	0.3813	367	37	41	25	14	7	2	Effector
A0A421NY10	MRLLFIYKKSRIKNNIILLFLSIILLIGFNYRIFAHDEKNYPDYDKKHELSGIKYICFPGSPFEKAFYVPQKVQKQPCQNQEEWLTTNQMLISKVYKNVNNFVDKNVNKDDKFIYKYFMKNTTIKR	Candidatus Phytoplasma solani	0.2941	126	12	18	10	5	2	1	Effector
A0A421NXL9	MSVLPFLEVVISFFRDYHLIACGTVLIVFPVFIFLFVKGFIKLLLFVYYINFWIANFFSLPKKQSVTKNNDNQNHLPNILINNKDLDSNCLINLKLIEMMERKNHHNSQTDLLEMKQKMLETYFNQKIFEIEIKQKIKDLEEQQKQTTISQPKDFLDEIPKTLRQILEKLSNVEEMQFEILQDSTKKTHYNFDNKILYVHPEDFLHINKALVQQKNKQLKN	Candidatus Phytoplasma solani	0	221	20	25	28	9	2	1	Effector
A0A421NUX4	MTKQNKKLTVFNVTLSISLILLVSIIIYFIFTLHTKVTNLQEEIKKQTQKLNDLEMNNQNNSSVVSNQPENSSLTDLLKDLKEKLKSYGCIIDSPTNKLTPPPQMTIESLKKSKTKLEKEIEEIEKTIKDELEDKKSDAVFQRAIETFQSLESTFTTTGEKQDCVQLISLMKTYQVVAENRNSKIKELENSQKTLNMAASSRLEEEINNQKTKIESQKEKLNKIRIYLNNYAIIISLYLEDTIKLQTLMKSENTSPTIKAQLKQIKATLSKEMTKDLLKLNKLNSRDDKLIQFLASLRDE	Candidatus Phytoplasma solani	0.2906	300	23	41	39	27	2	0	Effector
A0A421NUT9	MTNKKYFFYFKLILMILLVLITWSLFWWVNAPIYQLENKTINPTALEREKAKKKLNTKLRTIHLELTAKENSTQIINDYIIFDVFPRGAKIKQNYLSNGSRAEIKREGNRQYVYNNDGKVTSLQYYNPDGTNANQCHLIYNYAGQIIDKKCYQSDGIQARSYKYTYNLLGQIIVKQEYNPQNSNNFKYNYSYNELGQLTHVQQYWPDGVTGIKTLYDYQLDDDI	Candidatus Phytoplasma solani	0.3508	224	23	20	21	9	2	4	Effector
A0A847N4V2	MFLFRFVFKLIKYIFVFLLILLILPITLLGFMYKNEAPKIENYQEIQSIEESVAISLDDFLKSTTQDKLVVGVEGDNINATIKEMFIKMSAENPTFNPNYLNPDVEEKDSKYAAKLANNMVGFKGAWLEYNQDTIILKTSADIELASFLVYKTSLRVEITVIEENDIITLTVKKISIGNLSANWIYNLARTGLIKLQNIDLSQMINEKLPVGHFDAEKRVLTVSRQELYSFLETAGNDDQNMAMLMELIRTIDILNIHIGESKMGLEIALGKLKAMLELNEDIRHLETQEEVFQVIKGQLASILISALSPDADEYVNLDIREKELNEILNYYLNQETLLEKDLPLGSKNFKLTMKPILTKLETGVMKLSIRFELANQEDDNFIAEIVVNVLPKPSTQNP…	Candidatus Phytoplasma sp	0.266	558	43	41	73	26	0	3	Effector
A0A847N8K5	MKKIYITLVTIFLLTITLTVSGIAWFNISNNSLIDDISLKAGSGDLLELSLDGKNFNKTLDEKVIKEKLKKLKFKDITTQDGFNFFKNPYQTETQRAIPNIDYISIEVWFRVIAQVEDQKDKHVFLANGKNHAYEIENKTGTFITSKGKRWESDIDFKYSDHQMIKKNEVNTYYAKDAMRIGVNHKDENKFIYDVSNDENRGYGKAFGAYDYYNQKNKETLRLPVETPKNQIYELSAWDKEEAGIVNHNQSYIMTLEKQDSYYIGQATINIWLEGWDPDAFDAILNDHVMIQLEFITARKATNS	Candidatus Phytoplasma sp	0	304	25	32	21	15	0	6	Effector
A0A847N550	MKKKEIIVVFIFILLIGLLFKNLDNKKTKLLIPQKKHDLLYISQEYLKQPLFFNQENHPVLLKLKEGEVSFKGLSHSRVEIEKAHIENKYYGYTLKIYLNHQKNDIIKMPLIMSIDDKSYELGIVSVTFKNDLTQASVTSLYGTKNEQRHLENIYVTLKISNILEVYIGTQKTTITKNDEGYILSLIPDEYLYDETYVLINDGENWFYIIQYQYFYHYQMTEGVLKIY	Candidatus Phytoplasma sp	0	228	14	25	29	11	0	1	Effector
A0A847N5I9	MKKLISLFLTLTIVFLSMTISVFAWFSTQNQSSAHGLNGQIESPGLILDLEVENSEIYVGDMIRDLTYLSTSEYTTLFSSLSEYGSFLKITVLNKTLQSQGKINISTYNNDHLSGPITGFKYMAFTSMTGLIELILANENKTDLDVNQLFIQNNNQTFTFPTGTPENPSSTDIYIFFWGNYDGLSNSQKAIYHSLIYYLAISFGD	Candidatus Phytoplasma sp	0	205	16	8	25	24	0	2	Effector
A0A847N4A1	MKKMLMIIIVSVFLMLSGCSEKLDGYHDKQLSYLKKYGATIYVYKEAVENYPSFKVFDELSEIEFEKNFVLVAFDCSKGSENINKKLLNDLYKKFETDSRLMVSFVLAENYEFLLETAFSSNGRVPSKDTEVSFSYYNFYQGFSGVSTMSYSLKTPPTVLLAGSIIGPFHSSIINYMKEF	Candidatus Phytoplasma sp	0	180	9	17	18	22	2	0	Effector
A0A847N865	MKKVFILLICIFLLTTLSGCYTSTFNPLGDEDEVIYESDDKTVRLEIGMKTDSVGRFYILQDEVMKSFVIDYFIPREIITVYIGAPELEESKLFLDVSFKKNNFFKQDYDIMYLSRRISEDDNSESETFTDFDVTLNRLYDEEVKPLNYFYNKWQTEDETIVFVNDDLTYYYGNMIQGTLNGENIWISFQANSFVVWSKVDLNMKLSGGVTFDGLNIVLEPFEWYTEYPSRITLIFMEITNA	Candidatus Phytoplasma sp	0	242	15	13	22	16	2	4	Effector
A0A847N7I1	MKLSELWGKKQVGKQTRKALIFLIPSFILTAIMIFVTFYGQDTGDFSIGIDKETHQKNISISTNANSKENKKIIRGKARPIQPISSAAIKARYLDEILKNPGGSYHTENFISYTFYLKNESELSFSIGYNLIVTEAERQEVTDQFKIDKSIRIMLVDEKNTSIYQSEQSNDTLANQTFNQGPVIIKENGIHLNPKEEKKFTLIFWFDILETSTLEEMPESIKFQMVFKIDEGH	Candidatus Phytoplasma sp	0	233	14	23	16	19	0	2	Effector
A0A847N8A8	MKTIKRLLIVIYILIGFISYSLGIAVYENLKVDQEVRQFKKDMVLKETITIGDKMTSYYVPRETKEDEEPSFSDEKRRYVGQPGDILVTRESPYPYYRGIHEFVSYYFGGHAALVIENNQVMEIAGFGSGSIWDVITHDGVSDHDFTQTVITVPNYWLDRNHRGESDPAYPYYGSFYRDSFIGLRVKNITKEEKQLAINEAKR	Candidatus Phytoplasma sp	0	203	7	13	11	13	0	2	Effector
A0A847N591	MMKKISIIFLLLSYILITTQTSYAINYRNFEDVNFVRPIRLIHQFTEEEYETYYKHVQKRKFYGWQTYLVHEDIKVKFISETAFVYHNDGKSVIDYHYKAKTKELRHYDISVSGSIGISSNKSDKTFKNGLTASLKMDFKYKNQVEIQEETELKIKIDPQTKLRYYYYGEGLITNGVAARYVLYFLREKGGFEVFRVTTHYPRLEVLPI	Candidatus Phytoplasma sp	0	209	8	21	16	12	0	1	Effector
K7WPL1	MHKKRKIILIIWIIFIAIIILILLFLLGLRLPKLPKSKLLKTENTVETQSQYQTQYIHDPKKVQDIIKSLIKLKHLKESKQQQKQTQKQEQTEYQDDNEYIYDNHYLYDPK	Candidatus Phytoplasma tritici	0.3334	111	3	17	15	4	0	1	Effector
USQ93380	MFKLQNQFKIISVCLFTFLGFLFIINNNQVMAMKKQNSYINKKSKDINNELFNLLTNKKELEYKIHCFRVKEKLNSYERTEVLKLEIEHHKLKLKISEIYKNNSKMSKVTFNLKPLIKIIEN	Candidatus Phytoplasma vitis	0.4364	122	15	21	15	7	2	0	Effector
USQ93544	MFKLQNQFKITIFYLFTLLGLLIILHNHQVMAMNNGHISQNNGHDNDYTNFQLQARILQNLNFQQSRIIQQIFNARNNNASEEVISNLVSQNVQLSQRISAQQIIVHNAMPRENNPNQPNNPRRR	Candidatus Phytoplasma vitis	0.4247	125	22	2	12	7	0	0	Effector
USQ93138	MFLEIKFQNLFFLIFIIILLWVTPLYFVKANEVIIRGIKPKKNPFSYKMNYKPTDCNKLILPAELTFELQNIEETEEGNNYYYKLTFEDNKKTLKELSLFCHLNTSIFHTNESTNDNDDLTSLFDIKCFYKREGLFTEFETNLSESQTFYEIDRKEGLKKQERKFSFSKIDLKEWAYDIKIEIKTKSQNHEQYKKLENKKIKLKCELDITDKDNYPAYLFNLFDQFQNLNKYFPNFFRIDFDFYEYDNSLNPIWIVFKDKNEFFIYDLIINEEVQYKNKTYQDLMNLYHDSYNKQIQKGIEKEIEEFKSKLKYLESQMNKSYVEYIESTTKMDKIRESMKDCDDLKKLYNYPKKNEKEIAKKFDSELNRLKKKNKKEYEAFKKKKNDEKLEELKNLNSQ…	Candidatus Phytoplasma vitis	0.3633	626	62	98	53	35	8	5	Effector
USQ93263	MFRNTNYYKKYIYYFLRSVVFVINLILNIFCLCLFAASICKIYFGPEIAREKVLNIFGFDYYLVASGSMEPTIKTDDIVVVKKISDEQKEKLKAGDKTTGDIVVFKNKDLYKDIPIIHRVIINDTSSKTIKTQGENNSSEDPNTKYDDILAKHMFTISYFKTFLCFFLLILLIFSNMPLLLKNLFLNENKKNNLYK	Candidatus Phytoplasma vitis	0	196	16	23	21	11	4	0	Effector
USQ93484	MIFYASVFAFTKTYSNSPITNSNDIIPTNNVISENVKLNEEENDKLNEENCSYENENLSESSSEEEIEKDKPLLNNKNTKNNKIFKLLKKLKTKKDPK	Candidatus Phytoplasma vitis	0	98	17	15	8	10	1	0	Effector
USQ93473	MIKNKNYKLINLKYFLYFIICVFYICIKNIVYAEKNYNFDLLSRNDLLSPKINDLKQFLINEINQKRILVDDKDKTFFLKNISLAKIIDKSSNFPSDTSFFIPGNKYYFVLEFPTLVKSNDNLLQKYKFSFIYENRFSKILKKTELGTLDDFNSQTIINKIKNLNPILNKNELRFDKNPNLKEAIITSKDFEGKVLVTYNIKQNIPKNPNLKDFLKKTELGTLDDFNIQTIINKIKNLNPILNKNELRFDETPNLKEAIITSKDFEGKVLVTYNIKQNIPKKPNLKVFLKKTELGTFDELNSQTIINKIKNLNPILNKKELQFDKNPNLKEAIITSKDFEGKVLVTYNIKQNIPKNPNLKDFLKKTELGTLDDFNIQTIINKIKNLNPILNKNNLQVEK…	Candidatus Phytoplasma vitis	0.2773	1059	149	147	117	37	2	0	Effector
USQ93430	MINKKNYKKINLNILILFFMFIILLSNHLIFFLINASDEKEIENLETFIPISKRILFLPKKDKNNKEKILEEIRKINPLLKDLPKEYVNLKPNNEIQIIIPENSSTIKKIYGKVILNIEEIQNIEVIIPENKRTIKLTATDKNNKEKILEEIQKINPLLKDLNIDDLTITNNQINIIISDQRKEILKMTGVINIKILEKEISETTSLNNPSENNPQISNNKITNNKSNVFLWIIITLVILMLLGGLCLFFYKKHKNKFIEK	Candidatus Phytoplasma vitis	0.3442	261	35	36	32	11	1	1	Effector
USQ93462	MKKNKFFLKKINFICLFTFLFLLIVSLTNLKAINNDDDELKKYYNESEEFTKISDAEEIKEKKYNSSTQPKIKVDSLFFKVIEKNKKISFDSLKQSNISFDVENEKIEINDLLKNKYKKDSKKKHVFLGWKYDLGSFLSKKIRLFYGIDNVRTIPCSSFQECLNFKQFIFGLLYHNIPKIDFLFNFLDLSGFKEEFIDNKYDKIGLETVCFYSLLTKDPSLGYFYFKDEDIKDIHSVDISFCNCKISGYSLIDLIFEIINLKNEDLIMFKQHFNSYLEHLSKMDEEKISKQEIDFLHEEFLENIIDIDDMDILDKKFLLHLIKKVISIFVPKIFSLHCSIDHKNIKPLKEMNFELSLEKEHQTMGFLLKIEKTENNIFYLFFYEIFKDEKSNEENLRLI…	Candidatus Phytoplasma vitis	0.5472	445	33	63	54	33	7	1	Effector
USQ93518	MKWKQFFYENKKNISIIFIILSLILIIIISLIIDYNNTKKEKLKKQEETQNYKNNLPKQLKENIPDKDNIAFIDLVINANKDIFPLLKQEKFRKSLYYALNRKEITQNKNNLKPISVLFTKAFFTDNKNCFPKTFLPQNEESMKIYEDLDLKNYGFNEYKALKCLEESWESMNSEEQKKNYVLRFKTNKNISTLEKIVKQINDLFQKFLEKKKLDPNKLKIETTYEKDFDMRLNILYPMDEYKKKYNNKEYYYLYLITTFNFKNDSKISIDLSHIKKYLENKKNQDEIVDVSFQNFFKNKELVDSQGIFKGDIYVFYDFMEENIFRLFPFFKEEYQSQQKESKEIQDLRQKTFEEIFEKVLCLLHEEMLQIPVFTYNEENEN	Candidatus Phytoplasma vitis	0.35	382	39	58	38	17	3	2	Effector
USQ93551	MNSYIQTILIFFKVCSAVCCGCNTIDIYKEEVNEYWHPIKQEIKLNYNKNKLKEMCLNILDNKETKNYEIVFEYNQIKIDIQHIIKDIDNLNIENIIKLKESIINYYKNNYNKIFIS	Candidatus Phytoplasma vitis	0.4047	117	17	15	7	4	5	1	Effector
USQ93412	MQKIENKINLKRLFFLFIPIILLISNNSLIFADKEKPLSDILTHRELGTIKTTGQQPTKDEVIAQVKKLNNSLKESNLLRIDNDPKENKATVKYNNNDYTGEVEVIFTVEKKEKPLSDILTHRELGTIKTTGQQPTKDEVIAQVKKLNNSLKESNLLRIDNDPKENKATVKYNNNDYTGEVEVIFTVEKKEKPLSDILTHRELGTIKTTGQQPTKDEVIAQVKKLNNSLKESNLLRIDNDPKENKATVKYNNNDYTGEVEVIFTVEKKENINDNTNKTSETVTESNKENTSFLKNKWLWMIIILIIIASVGFFSEITKNF	Candidatus Phytoplasma vitis	0.3091	320	36	42	30	16	0	2	Effector
USQ93139	MQKRKKRFNSLSKLQKGILFFSALVAVSLIGFVVAAINGDNPFIFLFKFNKKEHSVKLKTALVLDSYIGADDLTLDKTSFNNPINNPKFLIAKNGSTRGAIEANNEGYISQFLHKVFVDKNVQSLDIFESKVKDEPNLKVGVKFYLVPISLQGKDPKEFSDDDYKQLLDLSEFKYREVDDNNQQIGEEKDFFGSCVVFDNETYDTKDGKIKYKYNWLESKESNSEEIQVNILKFNNYYYYYPKDDFFTSEELRDNKKLQEKLSENSANFNYMGSSMDISSKKGIKPKKNSSSLSNNSNFGIPSIDDIEKEKPNKCFFYKKPDYPKLIAKKGNNYSKTEALILINFWNEYSLSNEFFYDEIEKKEIVSKTIYGDGTEELPLTLFTQVTYSLVDNKGEVHT…	Candidatus Phytoplasma vitis	0	450	39	59	37	41	2	2	Effector
USQ93170	MSFNFFKNLKIKVLFLIFLIFSFLNIFLIPVFALITDGGGGTNQLSFNPNDYEIDYSQRHNSKFWRHEDGHVFASNARMFYDFPGMKMVPCRTYQEYANKTQIASNAINIGLNFFPPAKFFKVIKTGYQIAKEYGGDKICDFKDDGVAMINDIVRYYTLNDQGKAFFFFNPSQLNEIKQVDITFCDCDMSSSFITSVIDFVSNLTDFLETANFDELVEKLLLKGEFSDAELVEIGIAKMDLIQNKITKEIKTKIKNYIKKKINQKVGHAITKTALKKGTKKVVGNTWRKIVFPEVFEAIDMAEKKYESFASKKENILFDIKNNSHEKTLGFALHFPSQNELEVYELKKDSNNNSVYRLIKRVNFSDSSHMLINLIQPKHGLEIEPQKKLTVYCGKLKK	Candidatus Phytoplasma vitis	0.3954	398	31	47	31	23	5	2	Effector
WP_121463838	MDFDLGSQKRLAEALRRAHARGVKWLTTNYPTQEILQFYQGFNFNYMLATTNVKKKKKY	Candidatus Phytoplasma ziziphi	0	59	4	7	6	1	0	1	Effector
WP_161554967	MKNNNQKQKKYFYVDFEVTTGQYLTLRIPKDGDGNQNGSNNDRANKKTNIKK	Candidatus Phytoplasma ziziphi	0	52	9	9	2	1	0	0	Effector
WP_161554974	MPFIKKNHKTKTKNIRNKKTTNPKKAKTKNNKNILSPKVNNTNYLIVEQIQSLLKKIK	Candidatus Phytoplasma ziziphi	0	58	10	16	4	2	0	0	Effector
WP_121463976	MQNIKKLITNYKKTFIFLTITLIFLISVSIYYLIREKEKISNQVVENKQITWNQNPKTEEEYNIALEQWKNQCCFQSGSTYVASTIVSKLGSPSKTGKLTRELYCLDSGNIWVPSLTVAYVNAIPEEQFKLDYCYFKNWTLDVINFTRKGTPYDNSFCGFGGNSPACRLVFDSGWSIKFDTYCDTTPPPTKPSHMR	Candidatus Phytoplasma ziziphi	0.3248	196	14	17	14	16	7	5	Effector
WP_161554978	MYEGMLSGTIKLRDSIQCDYDETSTNRLFGSPPFRTSKTLRNHPIRGIKN	Candidatus Phytoplasma ziziphi	0	50	3	3	4	5	1	0	Effector
A0A1V0PKS9	MIQIKNKLYLLPLFLINYLGLFLLINIHPVTAADNNKNQQKEDYDLVDKAINDLNEGIEYFNKKGIQINLTRITKLISTKQKRNNKTENSSSSSKKIKK	Crotalaria phyllody phytoplasma	0.2418	99	13	15	13	6	0	0	Effector
A0A1V0PKQ7	MKKPLNFNKKFIGLSLLIFSVLIVPLIMFCSGVFESSYEVGSSEDINLEGESILDSPELTQSQDKARKFGRLI	Crotalaria phyllody phytoplasma	0.2703	73	3	6	10	10	1	0	Effector
A0A1V0PKQ8	MSIKAYDEGLYFDQFSKASNDKKEKVLSLTQYLIIKDSKKISPAVKGALSEFLTTVFQDIFGIQEWDYNDPDFSKFAVFDCDADLPSTYYSSILPNEIQTYYVTKVIKLIDDKADPTYSDSITKILTNTYISQKVQKAISDLTNNA	Faba bean phyllody phytoplasma	0.3548	146	6	16	11	15	1	1	Effector
A0A7L8YR95	MQQKENFLSTQKGKIIAGSGGLVGIVVIYLLLSWMFGFWPFGKLTKEKINAMVIDPGAVTSSISQTDAAKKAKTVTDSYNNLKNAADKLNVNNKDEVLTALNALKTKTDEITTNSKSDSWDVAAFVTSFNQITKADFESAANAIIKAADLK	Lactuca serriola phytoplasma	0.4615	151	12	18	12	12	0	3	Imp
A0A1V0PKR1	LPKKPKSESKKEDNLKILNKYHNLLEFIKKIYLKYQNEIKKINNKLNLHQKDYLILNKELHHYKNLKKVFNKKIDQITTELDQKKQILMKHKIYSFKKASLMIYGLELQEFKQKNDDMKKIIQAKKEQIQNSKIKIIDLEKYKNIYYKILYDLSKCQKSLNIVFSNQ	Lime witches'-broom phytoplasma	0.2	167	15	39	21	8	1	0	Effector
A0A1V0PKR7	MMKIKNKLHLLPFFLIGYLGLFFLININPVMAMDHNNKDKQIKNYTEVSETELNNFFQLLNRSKKNISEIREKIPHLKNASIKEIEQWACSSDTQQTKNKRLKTIDFDLNQHPKN	Lime witches'-broom phytoplasma	0.268	115	14	15	13	6	1	1	Effector
A0A1V0PKQ1	MFLVKNKLHFLKLFLIIILGLLMMTNNNQVMAIKKQEFISDNKNMNIKLLELSIQQKQLEEEIYYFRNNKNPDLNLADTKKILKLEEKNLQLKEKKSEIYKNISQKTKKVTFNLKPFIKII	Lime witches'-broom phytoplasma	0.32	121	14	22	19	4	0	0	SAP21-like
A0A1V0PKR5	FAMWYKYSNNNEISNDAEYAWHLQAEFVLQNELTHFKFDSDKKTELLNEKNAITAKINKYNKRKKNNQLLSTRHDQPESSQQNIISTIENNEYNSSDDNIQYMNLRKNYSHTLSLIKPENS	Lime witches'-broom phytoplasma	0.1111	121	19	12	10	12	0	2	SAP67-like
A0A975ILT3	MEKDSIKNIIKKNKKIILIIMFLTFIVLALSTYLCSIFFYNSSNDNVLDNNFVSSKKIFLIEINWKKKLKF	Loofah witches'-broom phytoplasma	0.5	71	8	12	8	7	1	1	Effector
A0A975FK09	MEYVKKNSLLKKIIIVFLFIIIIINSIGVCFNYIKIKDIKTQVDKYTTNNPKEQYNSLISNIADYYKKLNNIDENINQQYSSTSKVNTESNMYYIDLYAKSEKDKLQDEKTFSNFKKYKEIANDQNIKLLIDKFLLCCEELKKYQKKLEDEIETETLKNGSVAKIKEIINNKQNVMDNLNFGRCYLNYYCGILDLFFDILPELDNLSKSEDITKYQKLILRKIKEETLNNKGLTQQLKKVLDSPTGRDIPKLFHTIFNTN	Loofah witches'-broom phytoplasma	0.27	260	28	38	28	14	5	0	Effector
A0A975FLK0	MHKKKKNKFLIILSFFLFLFLSLSFFIIFYEPKIILPKDNGMPKIINDIKNNISKIINLETEIEHKKTEIKTIQTEIEHKKTEIKTIQTEIEHKKTEIKNKQKDYSPLFALNQSLNSQKEKLENEKLEKEKQLKEFKSKIKSIKEYVEFDLTKILFIKSSNKLKEIQVKLTNFINEAEKESTKTFSLEEMNLKNLASDAKLVSYSIDFFLKLPELPKEEEIFFITRFKVIKYFIEKISGIPTLNPKEQQLKQLQFFPKVFSIVKLISKDFFHKTVDNVIQAELQSEKLKDEEKEKIKELCKSINYSTKSESTNIDLIEELKSEYLYIFQQKDGVRDVSYEAREGQIKTFRKNLILIWGVLLSNKNQIE	Loofah witches'-broom phytoplasma	0.2914	368	22	63	39	27	1	1	Effector
A0A975ING8	MIIKFLFIAFILGIFIPSLTYLVYIEKNIFFYLLLSFVILFFIVAELILACLVRMIKLDEINICIQNKYP	Loofah witches'-broom phytoplasma	0	70	3	4	12	2	2	0	Effector
A0A975ILQ8	MINKKKINICIYLYLICFFIFFLFKINQILADNKKLQDIIPDDKKTIHIDASKKHDKNEILKIIKTIDQSLNKLTVDSLTIEDNKVKIKVTQEQSQQNNIVAGEIELTLKDDAKKADNKVPQKQNENSNQNNEDKTLIIIILIVIIITIIGYYYYDKKRKSE	Loofah witches'-broom phytoplasma	0.2407	162	15	26	13	6	2	0	Effector
A0A975IM11	MITAIIGLYFVGFMFRAQIAKKYHELFPNRNTQIEQTQTISDLAMFQKRFEIIKKRINDQSKLLQLNNLEVDVETSQSKLSIEHPDSIGFEELINDIQTAIKDLTTILNPPIATPTTPNITQETKTLTSNEFQRRYDKLTTDFENKKSAIQ	Loofah witches'-broom phytoplasma	0	151	10	12	13	8	0	0	Effector
A0A975FK33	MKIQNKNIFFILIIMILLLINFYFKRFQIKGNPDNEISNSVLKKLNSCLRDKKQTLTNHNDLLSKPLFKCDMKNNKIVIMYNYTSQDLLLVEKKYISTDKEFQYKYNSDRKLIFKTSINDADFINTYEYNDLDQIITIRDKNGRIQTKYKYNSEGQKIKKIILRYDSPYIKQNIFHYEYDPKGRLITKIHYGFYSPYYNNFFKSNFIKNIASFFNIELNKFHKIDKIDTKYKYNSKGLRIEKMDHLGNHYYYKYVGSCYDKKL	Loofah witches'-broom phytoplasma	0	263	27	39	22	15	3	0	Effector
A0A975FI13	MKKKLILKKYNFTVFYFYILFLYFIFLCYCFINFIFIYGKNINTIPQLKNNHFINSSFEETNSNKKEENIKKITSQNKFFIGKIFSVMKKGIPNYKKIISFYDKVVKNYKKIGLFYERVNENYKKIKSFYEKANENYKKIKSFYEKSKLKDIIKKFFFNSSKVKNNKKDNYFFRSSDDISNFEFEPNSLINKEKKASDKKRN	Loofah witches'-broom phytoplasma	0	202	25	42	9	16	2	0	Effector
A0A975FIE6	MLDVKKIYNPLFLESIREPEIAEKHVREKHDYEYDNEGRLFEIKKSKPITKDQNIQYTATGKNKYKYNDKSKNWSEFDFYDKENKLIYAKVRVYNKDNQEKINSYIEYFKYPNKKEKTEFCLISEDGYSEAFYIAITNLSYNPQKELIFEQTAQMAVTPEEEDEKTNIKNPNIMYDPTSHFVYEY	Loofah witches'-broom phytoplasma	0	185	16	25	8	9	1	1	Effector
A0A975FJM0	MLKINNIKCKIYFFIFIFLSMIFLILAIYNNLQQYKEEEIKLLNDFPVFEVEYVGGDNKKKTLIPIEIPNFNIEKYKHLINVEHSAILFSKQMQLKEPLFLKIKIILDTKNTFDKPEDYFNLRIITVDKNNKKEIYAEDHKPCYFEMEENEIQKIQINTQIEQIKIINTLEEPKLFLLYNYEIVDSQGKSIIGGTNEITQNIQNIVNK	Loofah witches'-broom phytoplasma	0.4088	208	21	25	19	5	2	0	Effector
A0A975FKK4	MLLFSYFIFFVFFNHFNKEIQAKIDYTVLSYNQKIEAINKLIKQIEKMDHSNKIELNIAKSFRKMSVNTLTKYDFSLANIENNMNDLPEGSNNPENYYTKFKKIKKNFLNSYLLNENELDQILSLLNEILVRYQNNLLHLKEYKNFFYIHFLEEEKIKIKKLIEIKFVLFEETYKISDFEKEVNKNGLESEDYKKFNELLISNKAGMYNIHSLYDLTKSDSFYNNYIEIKKRYDKITLDLNDCLSKANNVKKLLKIFYSIQLKKIYEEEEQEEVFNQKKSLTEDDIQEEIKNNEQVIKIIKEQSQMQKFNIFSFIFNLIMNIFILFFVFRKIKK	Loofah witches'-broom phytoplasma	0	334	38	47	36	20	1	0	Effector
A0A975IND5	MLTKLKQLTKKQKILISIITITAVILIISISTIIFNKPNHKKINSN	Loofah witches'-broom phytoplasma	0	46	4	8	5	4	0	0	Effector
A0A975FKM7	MNDRIKNLVLKIILPFLISISLILTLFSYKNNSKDFIKEQKRYVPETIFEEFQDVLEEPRKLIDLIQLRNELQNTINNAKLFYDLIKELDSSLVSDSEPETTSSNNIEQKLKENKILQKKISQLEDENKIFKSNSLNNNPNKPASSQEGIEMDLYEELLEKNKKLEEEIDQLKFEMELYKK	Loofah witches'-broom phytoplasma	0	181	18	23	26	15	0	0	Effector
A0A975FIT8	MNINRKFYQNKKKILIILITFFSILAIGIYLWNDYNYSNNEENEKLKQNNTNLEKK	Loofah witches'-broom phytoplasma	0.3863	56	11	8	6	2	0	1	Effector
A0A975FJC0	MNKKNFVLNKIYFSFFICPFLFLNFLVLGVVPEKENYKVLLENPKESQIESPKKDKDIKKEEIVTYKNTKDNEQKKKTSSEQKKVNNSEDLSKKETQNLLEEQFVKTNIKTKYPSITWKHDLGSIFSKKVRLFYSIPGSHAVPCESFEECFNIKQFIFSLFEHHIPKIDFLFDFFNISGLKEEFIDDKYDKTGLEIVYFFSLLKKDPSLGYFYFKDLDKKYIESVNISFCNCLMSGYSILSLVSEVINFKKEDIHILKKHFQEYLKHLNEIFKNKNIKKKELDVSFEIFFESIIENTNIEDLEKKFLFNLIRTIVSHLFPEHFFIHFKIDCRKPKPIKEMQFKISTEKEHQTIGFVLKIEQKKNNSFYFCFYEIFKNMSRNEENLKLIDEIVILDPDKK…	Loofah witches'-broom phytoplasma	0.2727	436	33	68	37	29	7	1	Effector
A0A975FIL9	MNNNFFQKHLVTIIITSLFGIAIIIGFYQGFNDYQNEKNYLSPLENKPQQIPSKIKRSTEETPQPKIKTTAARFDQIKTYVFSESDDNTLLPNDLSEEEKTEIEKIKQKLINNLKFCKDCRQPWIDEYQTKINNLESQRQPLISQIEELKKQLTSLEQQLKIVASEKKEKEKSVFQLWDETQRPALEELRTQEGNITKQISEIKSEIEGLESKYSLYSEQIRHMEDLKQDSIKSLNRDIEQDKKTAESSLNSIYTITSTEG	Loofah witches'-broom phytoplasma	0.2973	261	16	29	23	23	2	2	Effector
A0A975ILS5	MNNNFFQKHLVTIVITSLFGIAIIIGFYQGINDVKQEENIQLYNFENADKNVQNEINQSIEKIQHFENQINLLEKQLKTKLINSSQFFINFYGGITDLSNDQFQKEISNDINSIMDTIETLKEHDLHSYLFDLAHQLSQDIINSSKNRVENSLSDIEEKLKKLTNKINSIQSKFQTTQKRLDQIKSYVLSEPTNYSLLPSDLSEREKTQINKLKNSWQLSLNLLKKEKTGVDEKQTECDEYQAQLNSLQPQIEALKPQQQKLEQDQADKNKIINQKKEVRGQFKYLPNQPEEVRKKREENKRILEAEIDKLQDEEIKIVGEIEEIEVQIGILEADQKMYQNMLTRAEGLKKDLEERYKEGEKQYKDSIISGLNELYDITSAEG	Loofah witches'-broom phytoplasma	0.2651	383	33	42	39	26	1	1	Effector
A0A975ILU7	MNPKNNKIFIISIILIVFISITFIFRNEIKQYFKPTSAPTTQIKSEDKNNNKPNNNKILPNSNSIPTNNKPPQKVTFAEPPTQQTPTKLQVYDKGVEKNPNFDIDEIKKQYRNGCFGRWKFENPTFVKAQHFYACCSIIEEKDGIKKNLIYNVLQEKIQKYQETDLKTNHVIKNQTFKVEVTNEWPNLDMPSTEQLFDNATGNLKEIIAFNSDGTIKP	Loofah witches'-broom phytoplasma	0.2391	218	27	27	9	9	3	2	Effector
A0A975ILZ5	MNQNIKNNNKRNTIIILIFSIIIISFFSYIFLTKNSQDETPRKHLSSLGQTPEKDSLEPEEKKHPQPKIKTTQKRFNQIKSYIFAEPLTNYLSLPTDLSEREKEIITLINKMWRLSLGNLNVQKALIDESQNKFDKYQSETNLTTTKITYLEQSKKTLEKQKEDKEKEIKQNQEEQNLASPDDKIRLQAKIEKLEDEVIKIVGKIDNINTVILNLKVFYKLQQDMLTDEEKNKRILQEKYKTDEEKYIDLVLSRLNELYDITSAEE	Loofah witches'-broom phytoplasma	0.4	266	21	36	29	17	0	1	Effector
A0A975FL51	MSKKIIITKKPNKKLTKTQNPNQKISIPETKKLNHHISPPTPNINKLNLLKIITYLTIILYFILHVNVIYYQNQIPWLTTGINNFIDLIKTIFSGGNK	Loofah witches'-broom phytoplasma	0	98	12	14	10	4	0	1	Effector
A0A975IM60	MVKKTNIKKNKLISLIFVILLILLLCLLVFYFFISEKKDVKKDESNTTSMESDNIFESQTANEANIYPEVTYKLPNEVNFFKKIKLNDTTEKNYYQISDLVGKQEDGFRMYTKHILNILTKNPIIFYLKNDELKTDSSINLLQDLFVDKNLYEYKNKPNLYLKIIKQKSLWGAQTNIQVQLLSEKEILLVNNYSDQIAKMNLVTTNLTLYKNRN	Loofah witches'-broom phytoplasma	0.4666	214	24	28	30	12	1	1	Effector
A0A975FIN8	MYKNNYPQSKKNKKKLIIIFSIIILIIVAEIIIKLFFFSKTKEVKDYQCQINKIFYRSDEQINHIDVYDSQTKK	Loofah witches'-broom phytoplasma	0	74	5	13	3	5	1	0	Effector
A0A975ILX0	MIQVKNKLHLLPFFLISCLGLLFITSNNPVMAIPNEEFINNTRIVNVNISNINVLKNHEAFKQYFDFTINGPCYNGNIADFAIMWKIKTPPHNLLGVFFDNGTRSDEDNQYTLEELKQMGNGAQNMYIFWQYKEK	Loofah witches'-broom phytoplasma	0.2211	135	19	9	12	4	2	2	SAP05-like
Q6YQM6	MFNIIKKIIKWFFIILGLLLCLLIGFFFLTSDTDKLPKQQIPILKETAFENIEEWDDVNSEFKMIKAKYTFDGLNGIGYYQQQLANKENIGSFELMKIQERLETQKERSNLACYIKDRHPFDRWNNKGLTYKETSINGFKFSRFDKEDDSQLYLYVKLEKQFKENSSGNCLILKYQGPKHFLDDDKDYYLGRARVSDSNFELTNFHLHFNPVRKTLSIFKDKHNNDKVEEAEMNKNHPNGW	Onion yellows phytoplasma (strain OY-M)	0.2528	241	20	28	25	12	3	4	Effector
Q6YQD0	MNIKLFNQKYKLVSFLCVISSIILVLLLLILSLQKRHSTFRSSEKIQLTNNQTQKPNQQNFVKTPNLTKPKTQELQQEKETLPLYIQTVNDKTHYHFIVPDSEFMQDGTLKNSETHVYMENLKPTLMHKIIYKIQPQYDGWVACFPSFNGQDLAGAFLYSVMTGIKTPPLDLVGIYFESPFDKFDISDWNKYTLDDILQMKNESQNIYFFWRSPKMTNIYKKYHLFKPGKEKYHPTLNKPISPQNALMLTEEFIDKFIPNSPSKKSKETEQ	Onion yellows phytoplasma (strain OY-M)	0.2245	271	18	30	28	19	2	3	Effector
B1N8W8	MNNKKRKIILIIWVIFISIILLILLFLLGLRLPKLFKSIQDKNEVETQSKYQTQYIHDTNKVNNIIGLINSLKRLKTLKQLKPQTEKQDDNEYQFQIESNDNNKLIKDIAVVSLTIGLGVISCVVLAPIFASLGPVSAPLALLA	Paulownia witches'-broom phytoplasma	0.2286	144	11	15	23	9	1	1	Effector
B1N8X3	MNNKKRKIILIIWVIFISIILLILLFLLGLRLPKLFKSIQDKNKVETQSKYQTQYIHDTNKVNNIIGLINSLKRLKTLKQLKPQTEKQTEKQKQEEEQYQFDWNSNYDNDDNKLIKDIAVVTITTGAVVIGCLVLTPIFASLGPVSAPLALLA	Paulownia witches'-broom phytoplasma	0.2065	153	11	18	22	7	1	2	Effector
Q8KY65	MLKKIQIKKLFILLLLNLFVTNFYGVFINKQGNLYNSKLNNIKAFFDIDWPFLSKTKEIKPNVEKQLITENSIKKDIQDAENHMNKIIILLNNNQNDENNTNEISILLISLNQEAVLVKQRIATIKKNFAKWVNKCQENKNKLTINNVLQEYFTTLSIFNQDIKNINDRIIKIEKKITQKKLNHSNELFINSNSRNR	Peanut witches'-broom phytoplasma	0	197	33	27	22	9	1	2	Effector
A0A531Y0U6	MVKLKNQFKIISIYLFIFLGMLFINNNKNLYALPGIDLEARKIRLEEEINSLTIELTNVFHDTNLESQTRLNRMTAFSNRLDTTSNQLSMINQQIIECIRNNLRRQNNQNQPNNNRRR	Periwinkle leaf yellowing phytoplasma	0.5508	118	20	5	15	6	1	0	SAP06-like
A0A531Y0C0	MFKLKTNLLFFKIVLFISLGFFLIISNNSVMAMENNELQNNSNFNDNNIEIPFENLPKQQTIQINNSFHEKNIIKFLFETKINLSKKLGVYDLKNLKEKYNGFLIKFNINVKQFVNTNNAKICLYSNASDLDNPIYDRYNFIGFLERIIIDNVSEEGLFNYKLKNNNHIEIYKSVFKQGLDNNLSESELEENVFKIILDFDIKKESNDLYMFFILYAYGFTESQNYEYINNFKLDKNITFYKNI	Periwinkle leaf yellowing phytoplasma	0.3571	244	40	25	26	14	1	0	SAP43-like
A0A531Y018	MLIFRLKKQLYLLIIVLFTFLGLFFITNNHQVMAMEKNKPLQTIYNIETKNVRINPNKPIKISYYVKDKNLSLEDMAKNINIINKLK	Periwinkle leaf yellowing phytoplasma	0.1418	87	11	12	12	2	0	0	SAP44-like
A0A531Y0A1	MIKLKNKFQIISVFLFTFIGLLFIFNTKCLYALPGITLETQKIRLEERKNELKSQEIVLSREPRNNVNIERLCYVRTEMVKIDMEIYMIMQQIQMRDIIQ	Periwinkle leaf yellowing phytoplasma	0.41	100	6	8	11	3	2	0	SAP56-like
A0A531Y0A4	MLKSTTQCKIIYLFLIIFVGLLFIINNQQLMAMNNDNNNNEIRNEIREINNRILELALEKKQLSNRMSLNPIRSFANLELNIRNRAIYLELNNLYNRLRIIGQQPINPNQPNNPLNR	Periwinkle leaf yellowing phytoplasma	0.359	117	24	4	18	4	1	0	SAP66-like
B1VB45	MKKTTKVINAVIVFFITSIFVSVFVLALNNFSLYDQTVLDIRLQNGLTVTSKITKYTPYGKILIPDTYLQDKEQTEYTSENSTSEIDYYFDVTLELNGFDVGTDIYLKIQEDIKIVEFGQEIAIGSDKYDFSKSCTIKIYEPKKYDPEKNKICDLKTNQQEEEWEEFNPYKIINKWEKYDEKNPPMIYKYDKNKPPQKDDKVTYKLKANFKYHKLPEFKEKDPQDTTNLDFQLYFDIKCTPVYKEGEEFKEFYDPENKPKLSQEQSIKLANQKTQDRSNLNTNTSNHHSNPKKQTFLAILLPPF	Phytoplasma australiense	0	304	21	41	22	15	3	2	Effector
B3R043	MFNQGKSNMIYSQNKLLKLFLIIPLFIAFTIFCYGLQNHKKSLQYKVSVKLPKPIQPPTDTEISEYFKVNLTNNPVNLENFQPSEDSNKTDSELIPITTKTSISKTIPQIKDSIITREYEVFLDDQVSSKEYIKVHVDYFAIKNISYYDKSSNEKKNISNNLFNQHYIYDWFLKTPLFKNSTNQIDDVILKASKQPGETNPKLKLDLKQTLNYQILKEYPIIKELISKNVDNIELEIDFTIKTIED	Phytoplasma mali (strain AT)	0.2334	246	22	30	23	20	1	1	Effector
B3R063	MKKMEIKKNHSSVNHIDNNSNNIKIKFIAIILFFFIFINLFLSIYSLYKVNKIKNLAPKTDIPKESNIITNNNGTLVVNSLDSLNKIQEMCLQQSLNNDIDSKYYQNLTTVIESLKKYQNNEENDQKNRDIFEKSLQLFQSDNLEPDQNVIESFSEYREQQELINLMKGFIECCRKHDEFKITLNSNINSLSELNTWEKLEEKLGQNNNSVIVNLIKDIESGRVFLTFYANLLNILLIQKEFQQKINNSSIPYEKLILKSIDRNYNLFFLKSIRKIIRKINTTKENKIPRQFSNLIMGIK	Phytoplasma mali (strain AT)	0.2553	300	42	33	33	25	3	1	Effector
B3R0Q6	MLKTKKISRIEKIFTLITCIIGISIIYLYIFFSYLNNEEIIKPISKTKINQKSAFETHKLLKSEQNLIFLKDIDKNVSPRFKEKYQEMNKFKDKIKNNNFQLSILETKLKSLEEQFNLIENKKNDVKLKLQQEEDLNKWKELQIEQIHLQQQYNQKNHLIESIKKIKQDNMFLEIYIRECIKILKFEEDLKQYLIQQEKNKIDRNIKKINIS	Phytoplasma mali (strain AT)	0	212	19	37	23	11	2	1	Effector
B3R0R2	MLNNNYFIKKSIFMFFIFLFFLGLIFFIKSKLFLSWDYFKESNKSLIDSKNFVLIKSKIKILEQDKDSLQAKIDSLSKEKEQEIATLEQDKASLQAKIDSLTNEKDKQIQNLQKEKTNLEATKITLEQDKASLQAKIDSLTNEKDKQIQNLQKEKTNLEATKITLEQDKASLQAKIDSLTNEKDKQIQNLQKEKTNLEATKITLEQDKASLQAKIDSLTNEKDKQIQNLQKEKTNLEATKITLEQDKASLQAKIDSLTNEKDKQIQNLQKEKTNLEATKITLEQDKASLQAKIDSLTNEKDKQIQNLQKEKTNLEATKITLEQDKASLQAKIDSLTNEKKREIKILEATKITLEQDKDSLQAKIDSLTNEKDKQIQNLQKEKTNLEATKITLEQDKDSL…	Phytoplasma mali (strain AT)	0.3636	732	61	110	85	49	1	3	Effector
B3QZJ3	MNFKQTLLTLIGILIGVLIILIFYYQNTGNSSQLPVLSPDSNLPNSNPINHKTIIDENVSNHKPILFDENVSNHEPLITSKLDNAETKIIPILITENEFNLIINYIENATMTKIPEFIQDQVQITKINEIKESYQKRQDLYRSWVKSDLETTNRFQEKIDNYKKEELDINNKKEKIQKIIQNLKNQKISHDINTKILQQENEINYLNKNLKNLNLVKTDLEQNYQRYQKTNNDNNKYRDNCEKQNTKERLLKIYTIKS	Phytoplasma mali (strain AT)	0.2375	258	37	29	26	13	1	1	Effector
B3R056	MSKINKLLFIISALSLISLVIGWLFFKTVNKKKNLDNFSQFLNHHDLPNDQALNDSDAANNWDINGIMKKFTETKNSILNATTETEAKDKKINFYHELVEIMEKMAPYQNKFNIQEKQFYDVQLPQITSEFINTNYPIRYEILDKNIDPQKTKIEANKTYSKIISKFNQNDELVIKEYYIKTLNFEQLIRLNEYYQANKFKKIITYYHMDDNYMIFNINPNDPKTKPKLEITEYNLYSQRQDTKYNREGQIISIKPPIYETIESKN	Phytoplasma mali (strain AT)	0	266	31	32	20	13	0	2	Effector
B3R044	MTLFKIFLKKKIFLFFLMFLFLMLYITINGVQQPAHKRETKYQLSVKLPSKLPSPSIKLLYKKDKEEHTIDNPTIQQVVDVVWEDKLSVCKVYTDTKRFVNGRIDLVKKWKDNDDNILQIEEMDSENSSSFKKAYRTNEKDSYNKILEFIIYQNLDSKEDYKSPTKTIEFTPIQPRTHHYLESKFFDFKQF	Phytoplasma mali (strain AT)	0.372	191	9	27	18	13	1	2	Effector
B3R0G8	MVKNNKKIIQQVIIILLMILPLLIIISVSGAIIKHYERMVDIKFKITERPLINVPNKTEVENYFICTDLDNEEVVIGWETTGKNIFDAVTDNTFAIVENYPRLQNNGIVTKRYEIKLNDKIRAKQELKVTVGDITNHFIKQNADSQQQPITPYFQLHNTPENKSIQLFKKTNDSADPNDAASWESLNNAKEAILFEAPSVTPGKSLISTQELKSDLNKFNDFEQQYKKSNTIKLQLQFKISQEQMEADGLWDSQKQGLTDQGQIQLCAQLRLFTN	Phytoplasma mali (strain AT)	0.2532	275	24	26	24	14	2	3	Effector
A0A859IA88	MKINIKVLSFLVIISILLLGLILYPHIQQEITLEINQEEPKTLNLQLSKEKELKYHPQINSNILIKTTRNNYDLIKNEILHDLLTKTWKDCKSKYSNHPTTPLFEKQGLGSIYNSYLNIQKKPKTHNR	Rapeseed phyllody phytoplasma	0	128	12	16	20	8	1	1	Effector
A0A859IAJ1	MNLLTKSKENFFKIFIGTLLFILTTTLTIYFSYNLYHQYKQQKFKEYQKQMEQYDAKNLLLNLAHILYYPNVVKKQMMI	Rapeseed phyllody phytoplasma	0	79	6	10	12	2	0	0	Effector
A0A859I9R2	MNTRNFFKKNLVTIIITSLIGIAIIISFYQGRNNAKKEKEELFLPKEEIDNYDSKFNSSRPKRETEKPKFTITKARFDQIKYYVFLVNNDQTLLPNDLSEIEKTEIEKIRECRKQTLGFVKRHKDKINEYQQECDNLKNQLQPLYPQIEELKKQLTPLELEKNHKIKQRDQLRNVGAIYENHPQNLELVQISEEIQALIGQISELNSQIGILESKREMYEGMLSNVIKLRDSLQRDYDKSEKEYQNQIESLLNSLYEIIPSAEE	Rapeseed phyllody phytoplasma	0.3809	264	21	28	28	16	2	0	Effector
A0A859IAP2	MTRNKKYILITTIFLILIGITTFYFFVTPQLFTSDAMLLKTSSQNNNKTEINNKIEVSQENFNKRLKYITNNELKELPKILPIKAKEKELRKQYQQQQMSFMSKDEKESYENILKINSKMDDISLSSKKINKDIKVLERQYEAANEQEKRKIEDKMNRIVDTLQQLSQQNKQLENDQTLAITRHNNLFQNLQTKNKFSQIDIQPYQNALKEIYNIKN	Rapeseed phyllody phytoplasma	0	217	24	29	21	13	0	0	Effector
A0A1S2NIY2	MDNQEKDLNLNFLNKSFKIGTAITLIAFSLVAIALILAFRPQFQPQPTNNSTYHNTNSIFI	Rice orange leaf phytoplasma	0	61	8	3	7	4	0	0	Effector
A0A1S2NIG2	MILLVIPIIIFFSLEEESPQGSSSDEVIEQMQFSDETQNPNSAPSILEKKSLKDVFIEKSGEFFERAIKSPKVSQSLKTFSNKLSSTISKSFSQNKNQSPRKA	Rice orange leaf phytoplasma	0	103	5	11	7	20	0	0	Effector
A0A1S2NIR2	MKINNLKINIKVLLFLVIISILLLGLILYPHIQQEITLEINQEEPKKLNLQLSKEKELKYHLQINSNILIKTTRNNYDLIKNEILHDLLTKTWKDCKSKYSNHPTTPLFEKQGLGSIYNSYLNIQKKQKHTIDKIHYTQQFQEKMLEIHTKELNFILNLQLSDIYLITDKPIF	Rice orange leaf phytoplasma	0	173	15	22	29	8	1	1	Effector
A0A1S2NIQ0	MLKLKKYFKIINVFLLTFLGILLINNNQVMAMENNNKNQQKEEYEEFDEAMDILTEGIKYFNKKGIKINLNKITKLLSRNQKRNSPTENSSINSKKIKK	Rice orange leaf phytoplasma	0.268	99	15	17	11	5	0	0	Effector
A0A1S2NI67	MSIFYQRKKLFFKILLVLVLIFFITTIAYAIEDWHKLKKDSNFGLKIAAPAELSVSKPADLHDTNKKFLVPTEHNFLMTTEQTDRVIFEQEATLKTQNDKLTFINGKNSKLDINYFFENLDLNEQLKDFFNVQILWKYKEQPQQSFVSYDNKNKPVIIDQNGNLKKIIVQFTIYASKVFPSGFQAKEKKLQIKYNIQKP	Rice orange leaf phytoplasma	0.2612	199	15	27	20	9	0	2	Effector
R4S1A8	MNNTKIQKTLVSKLAALFAIGAAVSLLFVSNVFAAAKGLNTFKTNQAIAITAENASNVEKVLTAWNKVDDTVKVADLKDHVTVTLNDAKTKVTVKAKDNDTVVAGSVELDIKAPTFNWFSWYMILLYVAVVAAIAGGVFYFVQKKRRA	Strawberry lethal yellows phytoplasma (CPA) str. NZSb11	0.331	148	11	16	12	6	0	3	Amp
A0A660HND1	MANDATSQKKSRVLLIIGLIIILFFLSFFIWQMLSKEETSTKEEKGTTSISSETDNNKSQINDKQQNIQESYDKATNEADFFRKIILDAETQKCFYKILNLNAKLEEDFKMNTKDILNLLKDKPISFALKNTELQPNSHINLFKETSLSEGSGTEQNLYDFKDKPNLKLKINKKRSLWGEKTYIQVQLLSNAELLLLNDFLDTDNPKINLVTTNLTLYKDKV	Ziziphus jujuba witches'-broom phytoplasma	0.4666	222	21	28	31	17	1	2	Effector
A0A660HMW8	MFFKRKFRNLFFFIFIIILFCFTPLYFVQAITIKIPRKKIPSFTINPESTNKLLPSVELSFELYRREEIEEGKNYYYKLIFKDDKLKKKLKNENKELKDLSFFYHLDVSILNESSDNKNLTDLFDIKCYQRDKNKPNAPFVEFKIITKSYKNDMYDLQSKPEQKRKFSLIDLKEWEYDIKIEVKTNSNHYKKYKELQDKKIKIKCELDITDKDNYPIYLFNLKDDLLKKDDLISRFDKFQNEKTSFQKMSKTNDVFYIFGLGPDLNQNIIYSIDYILNKDIASKDIYKEDNPIFLVFKQNDKFFIWDFISNKKVEYENKTYQELMDCHKKNKSEKKFESNLKSLRLKAYKKAIEFQKFLESKKESYSSSWFTKSSTKTDNDNKLTSVKANILEMEREDK…	Ziziphus jujuba witches'-broom phytoplasma	0	620	48	106	56	43	4	4	Effector
A0A660HNE9	MFKLKKHLFLFQIILFIFLGLLFVIDNNKQVMAAPNEEFVGNMRIVNVTFSNINIIKNFQPFSQYFDFTLTGPRYNGNIAEFAMIWKIKNPPHNLLGVFFDNSTRDDEDDKYTLEELKQMGNGAESMYIFWQYEQK	Ziziphus jujuba witches'-broom phytoplasma	0.25	136	14	10	12	4	0	2	Effector
A0A660HME0	MFKLKKQLYLLKLVSFIFLGLLIFKNNNFLYAFPGIDLDARMMQLTEERDNLLQQLHNNFNNLNLDNATRLIRMQNITASLDRVLEQINSINQQLILRDQFQQQRTNSTLNQQNNNERN	Ziziphus jujuba witches'-broom phytoplasma	0	119	19	5	22	4	0	0	Effector
A0A660HMB1	MFKSKKYLSFFKLFFLIDLVLFIFNNNVLYASPGIVLEQRIIQLQEEQINLLQQLNNTFNNLSLDSETRLSRMRNISEALNRVLNRINEMHQQLILRDQLQQQRINNASNHQNNNHRRY	Ziziphus jujuba witches'-broom phytoplasma	0	119	18	4	19	8	0	0	Effector
A0A660HMD2	MHKIQKKNLVIIVLVLLIIVSLVFVGIKLMNPQSSQEKSFSDTTQSLNGSEKQDENIEEVMIEVGDPKDMKTKIKEFIRNKIHNEDFNLLTYDVSVPSYNPIDKTITGTNSRGPIIQSGGFCCPIKDPSPDLLAVYFDGGGKAWSR	Ziziphus jujuba witches'-broom phytoplasma	0	146	9	14	11	13	2	1	Effector
A0A660HM98	MKNKFSFWLSLYSLCFCFYLGIGIAYYYLSPQEKIISPKTVFSEISKEKEILLNNNFQPASSEIDRFYYQSVIPIKKEHLEHLEVYDVYLGENTGMKEVLGWLKYFFPYKKFETHFSYALYNTSDIDNQVSFNFRIKEPPPEKFLLAYFEGGSREGQNDKYTLEDLKNMGNGASHLYFFWSMNKPYSPQPIPFIPENYHLEIIYDKGTNFGGPSYLAIDKIVIKDIQKDKIFGVYPINQKIKEPFVIFNYDFKLKFPFYNYEQEGVLWNTNHIKSLKKIDLYEKRTGQHRTLYYDVDE	Ziziphus jujuba witches'-broom phytoplasma	0	298	19	30	25	19	2	4	Effector
A0A660HM17	MMQIKNKLHLLPLFLMSFLGLFAFININPVMATDPKLPETSSRQPVNQNFTIEENIINLKQKIYDNATKITNIDKELQGSITDNQKENLLKLKENYKQLIDNQKEQLKTYKNLLNNLNDENN	Ziziphus jujuba witches'-broom phytoplasma	0.4796	122	19	14	18	4	0	0	Effector
A0A660HMP8	MNNNNFLKKHLITIVVITGIILAIIITYGKKDNNILTPPTTSKIIDNLESSTKNKIAEKQQLIKKLEEDFMILKKNFEIKKNDSNKYYDSTNELQYLESDLNMFYNYYLKDLKDSFTFPKIFNGINITKYRIEDIIKKNYYENEFNQIQEKITAFKYKIKQIIPKFKITQDHYDKVKVYITSKTDDKSLLPKEISPEEKIEIDQIREMWKQYLNFQNQDQANIDKYQEECDNFHLKIQEIKDKFPSLESTNFDLQQKIDDKQKKINVKQEDQKQFKYLPNQPESIRTTRKNNYDSLQAEISKLQDERNEIMHQITQVSLQIANLEADQTMYENMLSRAIKLRDSIQCDYDETSTNRLFGSPLSELQKLYEITPSEG	Ziziphus jujuba witches'-broom phytoplasma	0.3007	376	32	49	30	22	2	1	Effector
A0A7G1G7U9	MMQIKNKLHLLPLFLMSFLGLFAFININPVMATDPKLPETSSRQPVNQNFTIEENIINLKQKIYDNATKITKIDKELQGSITDNQKENLLKLKENYKQLIDNQKEQLKTYKNLLNNLNDENN	Ziziphus jujuba witches'-broom phytoplasma	0.4286	122	18	15	18	4	0	0	Phyl
