# Supplementary material for: PhyEffector, the First Algorithm That Identifies Classical and Non-Classical Effectors in Phytoplasmas
Source: Biomimetics (Basel). 2023 Nov 17;8(7):550. doi: 10.3390/biomimetics8070550 (PMC10669590; doi:10.3390/biomimetics8070550)
Supplement: Supplementary file 1 [file biomimetics-08-00550-s001.zip › Table S5.xlsx]

## Sheet: Second negative set (226)
ID UNIPROT	Sequence	Organism	Pathway	%Identity	Length	Asparagine (N)	Lisine (K)	Leucine (L)	Serine (S)	Cisteine (C)	Triptophane (W)	KO name
A0A4P6MBV9	MNKDKVIQFIDGQLFKNMITNGAINLQNNYQTIDNLNVFPVPDRDTGTNMKITMMSGVKEISNLETRSIVEVSQVLSKALLMGAKGNSGVILSQFFAGMAQTYQKLNKETININDFIHSLEGGYKKAYQAIIEPQEGTILTVFRKAVKQTLKAKSQFSTIEDVLSNFLQNAQKTLSQTTELLEVLKKSGVVDSGGAGFVEILKGMLLFLQDQKLLQVNQNTQTHTNPDKIQKLGQVNIKYTYCTEYIFQIKESQEKNLDMKQLKQALLQIGDSLVLVKDQEILKIHIHTNKPGQVLEKLLTYGTLKVSKIDNMKEQHQSILDQKHDTFTLQQESTPDPKSPSNLPNSNKDQKYFFIAFANDTKSQKVFADLKVNHIIKQSNFNPTTFEKLLQTNTSQNI…	'Catharanthus roseus' aster yellows phytoplasma	00051 Fructose and mannose metabolism	0.5704	571	47	62	67	33	2	1	DAK2 domain-containing protein
A0A081D444	MCSIFGILNIKTDPQILRDQALKLSSLMRHRGPDWSRIFASQKAILAHERLSIIDVNAGAQPLYNKTKTLILAINGEIYNHLDLRKQYKDKYEFQKESDCEVILALYQEKGVNFLDELQGMFAFILYDLTKNTYLIGRDHMGIIPLYMGYYLNQNFYIASEMKALIPICQTLSIFPPGNYLYSESGKMVKYYKRNWMDYQNVYNNQTNTNQLRNFLEASVKKI	'Chrysanthemum coronarium' phytoplasma	00970 Aminoacyl-tRNA biosynthesis	0.3008	223	17	17	26	12	3	2	Asparagine synthase
A0A081D611	MELLVSYEPHLLSFSEWWKQLFAESEDKEEKGLFVGATNNSTDLHSLGQFIQEGTKMLFETVLNVTSIKDDCVVPHIPNELDNLNYVAGKTYSQINQKNSSSH	'Chrysanthemum coronarium' phytoplasma	99980 Enzymes with EC numbers	0.5567	103	8	7	12	11	1	2	Glucose-6-phosphate isomerase
A0A081D4Z7	MNKDKVIQFIDGQLFKNMITNGAINLQNNYQTIDNLNVFPVPDRDTGTNMKITMMSGVKEISNLETRSIVEVSQVLSKALLMGAKGNSGVILSQFFAGMAQTYQKLNKETININDFIHSLEGGYQKAYQAIIEPQEGTILTVFREAVKQTLKAKSQFSTIEDVLSNFLQNAQKTLSQTTELLEVLKQAGVVDSGGAGFVEILKGMLLFLQDQKLLQVNQNTQTQTNPDKIQTLGQVNIKYTYCTEYIFQIKASQEKNLDMKQLKQALLQIGDSLVLVKDQEILKIHIHTNKPGQVLEKLLTYGTLKVSKIDNMKEQHQSILDKKHDTFTLQQEPTPDPKSPSNLPNSNKDQKYIFIAFVNDTKSQKVFADLKVNHIIKQSTFNPTTFEKLLQTNTSQNI…	'Chrysanthemum coronarium' phytoplasma	00230 Purine metabolism	0.5722	571	45	59	67	31	2	1	Predicted kinase related to dihydroxyacetone kinase
A0A5N5XRX7	MELKEKYEKVAILTSGGDSPGMNAVIRTFFLTAKKKYKIYSIKDGFLGLYNNKIEELLEKNFPERILNISGTFLGTSRFLEFKKKEEIRKKCLYNLKSQNIEKVVIVGGNGSYQGAMSLQKLGLKCICIPATIDNDINYSDFTIGFSTAVNNIAIAIEKLRDTSISHKRCTIVEVMGRKKGDLALYGGIAKGANIIITPEKLMKENEIIEKVKFFYESGERHVIIVITENILNISLLAKKIEKYSKFETRAQILGYTQRGGHPTAEDLFLASQMGHYAVYLLEQNIYNVGVSLYKGELCSFKLEKIIMKNIIQNNFIKFIKN	'Cynodon dactylon' phytoplasma	03440 Homologous recombination	0.5697	322	22	38	30	18	5	0	ATP-dependent 6-phosphofructokinase (EC 2.7.1.11)
A0A7G3ZP84	MIFINMFEKILEKSQNHILVAFDTKGKTKKKELYLDYKKGRPLIPQLLLDQIVLVQEYLKLSGIKYHYQTGGAKEA	'Echinacea purpurea' witches'-broom phytoplasma	03032 DNA replication proteins	0.4237	76	2	12	11	2	0	0	5'-3' exonuclease alpha-helical arch N-terminal domain-containing protein
A0A0P7IR13	MIKIKTSQEIRKIWLNFFISKQHKLEPSASLVPDKDPTLLWINAGVSPLKKYFNNSVVPRHKRIVNIQKCLRANDIEIVGKTSRHHTFFEMLGNFSIGDYFKKEAIELAYEFLTSHEFLALDINKLYITYFEKDLETYNYWLQKGIDKNNLISLKENFWEIGEGPCGPCTEIFFDRGPKYDQRNSDLILNNIENNRFIEIWNIVFSQYNLEIKNNRKIYHELSNKNIDTGAGLERLACILQNKDNNFETDLFLPIIKKISILSNKIYHLDKNKEIFNIISDHIRALVFGIADGVTLANDGRGYVLKKILRRAFQKGIKLGFSKPFLFELVPTVVNIMEDFYPYLKSKIPIIQTIILSEEQKFLLTLCEGKNKFLEFTKTSKKLSDSDFFKLYDTYGLPP…	'Echinacea purpurea' witches'-broom phytoplasma	00970 Aminoacyl-tRNA biosynthesis	0.5662	682	55	72	69	38	9	6	Alanine--tRNA ligase (EC 6.1.1.7) (Alanyl-tRNA synthetase) (AlaRS)
A0A0P7JJY4	MSISEQTIDGLLFKEMVINGTINLKKNCQKINNLNVFPVPDGDTGTNMYMTMAEGIRHIYYLNENSITEVSRVLANALIMSSKGNSGVILSQFFSGLSNKLIQLKKSFVNIEEFIQSLISGYQQAYDSIFSPVEGTILTVLRDSLEAINDQKFFNNIEELLKQIIKYAKKSLEKTPELLPILKESNVVDSGAAGLIYFFEGMLLCCQGSKLSLKEFDKDFLLSKEILEDFDHYKATEISDISSSKIPYCYCTEFVVQLYQSNELSLSKLRKQFIKFGNSLIVILNEKLLKIHIHTNKPGLVLTNLLKYGFLIKSKIDNIKEQNKIFLQEQNFSYDNSILKKNYVLIAITPNATINEIFRKDFKVDYLIIIEQREIIWDFFWTNFNKILNKLEISDVILF…	'Echinacea purpurea' witches'-broom phytoplasma	99980 Enzymes with EC numbers	0.4276	561	62	49	70	44	5	2	Dihydroxyacetone/glyceraldehyde kinase
A0A0P7HXE6	MSKNDKKNKENLGEYSASSIEILEGLEAVRKKPGMYIDSVTMKGAYHLIWEIIDNSIDEALAGYATEIILKIFPDNVVSVSDNGRGIPVDIHPKTKKSAVETILTTLHAGGKFKNAPNSKNYSYSGGQHGVGASVVNALSTWFTVEICLNGKIYYQKYEKGVPTTSLQIIGNTNKRGTNIKFLPDETIFQDIKNTPYSLDVLKKRVQQLAFLNKNVKLIIEDLRLEPPQIINFYSKGGIQEYLQYLNENKKVLNQPFYQESSENNIFLEIAFQYNENYISNIYSFVNNIPTHEGGTHEEGFKMALNRILSKYAKDKNLLKKDLSFIGEDTLEGITAIIALKHYDPLFEGQTKARLGNYDMRQFVSKHFGIALESYLLENPQEAKKIIDKCLLAAKARVA…	'Echinacea purpurea' witches'-broom phytoplasma	03032 DNA replication proteins	0	648	47	62	59	40	3	3	DNA gyrase subunit B (EC 5.6.2.2)
A0A0N8IAX0	MLNMKIEDFALTKRTLKNLKSIGINSLGDINNYHLNELITSLNEESFEEFVIILKKYGLPESLNNLNLNKDILDVLYQNNILNCYSLLTTDKDALFKLFNHNHSHLNILRNVLDLYNLQKNNIHNLKNKIDNSVVDKDEIIWRNENQEHESASSWVIDKAIFPNNSNREYDYFKIRLSSPHEIRQKSYGEVVNYETINYRTAKPEKGGLFCPIIFGPVQDLQCICSKKQTLKKGQTCSKCGVEITEQLVRRERMGHIDLAAPVVHTWFLNSLPSRLAILLGMKAKELAEIVYYVSYIVINPGNSDLNKYSIISELEYGQYLERCDHNFVALTGAEAVKTMLQELNMEETIKTLRLELKQASKQKRDLIVKRLELMESFYQSDNKPEWIVLEAINVIPPS…	'Echinacea purpurea' witches'-broom phytoplasma	03020 RNA polymerase	0	1379	95	110	156	109	13	7	DNA-directed RNA polymerase subunit beta' (RNAP subunit beta') (EC 2.7.7.6) (RNA polymerase subunit beta') (Transcriptase subunit beta')
A0A0P7IC81	MFYLLTNIIICIICYLIGSIPFGLLIGFYHNRKINLLGSKNIGASNVTRILGFKYGLLTFLLDFMKGFLPIFIFKNYNLSLFPKEKTIILGVCAILGHMFSIFNHFQGGKAIATSVGVIAGIHFWSGVLGIMIFAILVKLTGYASLASLIATIITNINLYITKTNLYNSIMMAIITVLIFIKHKKNIINLYQGTENKFNIKNKK	'Echinacea purpurea' witches'-broom phytoplasma	00561 Glycerolipid metabolism	0.505	204	17	17	26	10	3	1	Glycerol-3-phosphate acyltransferase (Acyl-PO4 G3P acyltransferase) (Acyl-phosphate--glycerol-3-phosphate acyltransferase) (G3P acyltransferase) (GPAT) (EC 2.3.1.275) (Lysophosphatidic acid synthase) (LPA synthase)
A0A0P7HX43	MKYPIKINNQNFTYNKKSNLGKQLEQDINLTNNFYKENKIAFIHKNEIPIQVVKVEYAQRNKTKIVEAYYRLKSLPDYQGIYKGKYLSFDVKETNNLNKFPLKNIPNHQKVCLQNIHELKGIAFLIINFKRYNQYFYMPISFLINFTKQYSLKSIDYQTFINELWQIPYSYRPRLDYLKIVNKFI	'Echinacea purpurea' witches'-broom phytoplasma	03400 DNA repair and recombination proteins	0.5946	185	22	24	16	7	1	1	Holliday junction resolvase RecU (EC 3.1.21.10) (Recombination protein U homolog)
A0A0P7HXD3	MNKKIKLTQIEDDHKFEYIDGVEVPFELPAIIVRDVIPIPNNDFRIEIGRDFSINALKYAEKTKFPYVVILPQKIFALEDPEIVDIAEYGVLARIVASVKILNSSIYKVKFRLLKRIKTTFISKKDNFFNVKYIPVATELSDDIKKEEALIKLVMEQITSNTSQFLFISENNLLEQIQSGIDTEKIADLITFALKIDEKEKYKYLQEKNLNNRLFYILQDIHKKIDIIELENKINEEVKRSIDENQKEFYLREKIRAIQNELGDRAKKEEEIETLRSQIKNSKMPVNIKEKALQELSRYQSISSAVADSFVIRNYLDFLIALPWGKKSKDINNLEKIRTVLEKNHYGLQETKERILEYAAVKIMTKHNAQTILCLVGPPGVGKTTLAISIAEALGRKFV…	'Echinacea purpurea' witches'-broom phytoplasma	01002 Peptidases and inhibitors	0.5746	799	49	84	79	45	2	1	Lon protease (EC 3.4.21.53)
A0A0P7KCR7	MNKEDMTEQETIRRVKLDNLRKNNVEPFRNKFIETESISSLLFQYNSWTANQLEKNQILVSVAGRIILNRIQGKAGFANIRDFESDIQIYIRRDNITEQEFKIYNLLDLGDIIGVTGILFKTNTGELTIKIFKLVVLSKSLRPLPDKYKGLQDKEVMRKKRYLDLIVNPKARKTFVDRVKIIRFLRDFFNSENFLEVETAVLNSCVGGANARPFVTYHNTLAANFYLRIATEISLKKLIIGGMKAVYEIGKVFRNEGIDASHNPEFTTIEAYLAYANMDTMMSLVEKCLKEVCYKLLGKLEFNYQGNLIKFDHFYKYDMIEIIKQKTNIDFNNNMSLLECQKLAKNHDITLEGFYKKGHIISAFFEKFVEPYLIQPTFICNYPIEISPLAQVHPRNSQL…	'Echinacea purpurea' witches'-broom phytoplasma	00970 Aminoacyl-tRNA biosynthesis	0.255	492	37	41	53	20	5	1	Lysine--tRNA ligase (EC 6.1.1.6) (Lysyl-tRNA synthetase) (LysRS)
A0A0P7J1H3	MLDIKFILKNIELVKNKLKNRFVNEDLLDELIFLYQSKNKILQKIERIKYFKNQFSRQKIDKLSIQSNSKSIINDDINHDENLKKLQINLKKIEEQMTNILYFLPNIHHESVPIGYNESDNIEVYRSVVEPRKYDFVIKDHLQLGVDLDILDFQKASKIVGSKFVVLKGLGARLERSLINFMIDTHVSNKYSEVIPPFIVNQQSMFATGQLPKFSQDVFKLNLDKYNWYLNPTAEVPTINLHRQEILDIKSLPIKYVSYTTCFREEAGSSGKNTKGIWRQKQFNKVELIQFVEPKTSYIVLEQMLKDAAVILDKLKLPYRIMLLSTGDLGFSMSKTYDIEVWLPSQQKYCEIASISNAEDFQARRANIKFKAHLQDQGKLVHTLNGSALAVGRTMAAIL…	'Echinacea purpurea' witches'-broom phytoplasma	00970 Aminoacyl-tRNA biosynthesis	0	429	30	45	47	30	2	3	Serine--tRNA ligase (EC 6.1.1.11) (Seryl-tRNA synthetase) (SerRS) (Seryl-tRNA(Ser/Sec) synthetase)
A0A0P7HXV5	MRNLNLNNMNNKYDFKIIEKNRYADWLKYKELQKKSNFSNLPNFTIVIPPPNITGKLHLGHAWNNILQDNLIRRKMLTGYNVLFVPGMDHAGIATQIKIKQELQQKGFCIHKLTKNIFLEFANQWQQKYIKDIRKQWQDLGLLLDYDYEQFTLNPSISSTVEKVFVSLYKEGLIYRDYKIINWDSSAQTTLSDTEINERNVLGKLFYLKYFLIEDKVLSDDFVIVATTRPETIFGDQAVMFHPNDKRYQHLIGKQVVVPGTSLKIPIITDEYVDMSFGSGLLKVTPAHDFNDFQLGQKHNLKSVLCINSDGSMNELAEQYKGLDRFVCRERLISDLDKKNLLFKIEDYNHSLRFANISGIVIEPRLSLQWFLKTKELAKLILKKHKINFFPKRFLTLFN…	'Echinacea purpurea' witches'-broom phytoplasma	00970 Aminoacyl-tRNA biosynthesis	0.5516	872	62	96	116	56	8	22	Valine--tRNA ligase (EC 6.1.1.9) (Valyl-tRNA synthetase) (ValRS)
U4KK51	MNIKKTIDHFIDKMILNSTFDKPYWNIELIKKGKPNNWNHIDGCMTTSLLSLYEQTSNTKYLDFVDYFVDYYIFEDGTIRGFDPQKYSADDLAHSRVLFDLYKLTKKEKYLKAIHHTYSQLKSQPRTKEGNFWHKLVYHDQVWLDGLYMFQPFYTLYETQFNQKNNYLDIINQFKNVRKIMFDENKKLYYQGYDESKTLFWADKKTGLSKHFWLRAMGWYVAALSDVSVYIEDIKSKEYLASLLKEAIDGLLLYQDYESKMFYHVIDLADRPENYLETSGTLLIAYAILHASNNHILDESYEAIGVTIFEGTCKKQLTEVNGDLNLENICLSVGLGPESNTKRDGTFEYYISEPIVKNDAKGVGPLVMAYVEYLKISK	Alteracholeplasma palmae (strain ATCC 49389 / J233) (Acholeplasma palmae)	99980 Enzymes with EC numbers	0.4278	378	22	37	41	22	3	7	(Glycosyl hydrolase, family 88)
U4KL06	MKYGYFDDLKKEYVITNPLTPLPWINYLGNNGYYGLISHSGGGYTFYQDAKLRRLTRYRYNNVPKESGGRYYYICDGKETFNPGYFPLENKLDEYSTRHGLGYTVITSVKNNLKVVVTYFIPLNDNVEIHKVIVENLSNENKNIKIYGLTEWALWNAVDDQTNFQRNLNIGEVEVTEQTIFHKTEYRERRNHFAYYHVNQKISGFDTNRDQFLGAYKGYDKPEVVLSRKSKNSITYGGSPIASLEVSLDLKPNEKKELVYQLGYFENKENSKFDKKGFINKRNVLKQIEKYEDIDYVNQEFKKLNTFWNETLSKYEISSSEEKLDRMVNIWHQYQCMVTFNMSRSASFFESGTGRGMGFRDSCQDILGFVHMIPDKARQRIIDLASIQFKDGSTYHQYQ…	Alteracholeplasma palmae (strain ATCC 49389 / J233) (Acholeplasma palmae)	00500 Starch and sucrose metabolism	0	807	65	72	64	49	8	11	Cellobiose phosphorylase (EC 2.4.1.20)
U4KLM8	MKTIEELRLEIDKIDQEMKELFIKRMEVSKEVGIYKKENNLPILDQKREDQLIEKKKLNFNNEELWSYYEKFIKYIMELSKEIQK	Alteracholeplasma palmae (strain ATCC 49389 / J233) (Acholeplasma palmae)	00400 Phenylalanine, tyrosine and tryptophan biosynthesis	0	85	5	15	9	3	0	1	Chorismate mutase domain-containing protein
U4KKR1	MEITVLTTDLVYQSFILAAKNVIKEKKLLNDLNVFPVADSDTGNNLASLMASIIEKAQKSDNLNDTLNSISNAAIYGAKGNSGIIFAQYIQGFSEQARSNQITMEEFSVRLEEAFQRAYEAILHPVEGTIITLMRIFSQTVKKLLNKSANFADLLNKSYEELLIELDKTPEKLQVLKDNKVIDAGAKGFVLFIEGFIKALEGTEIELSKEYISEISEQKGHIEKSSFRYCTEALIKNDHKMSASEIRQELSQLGDSLVVANTSDYIRVHIHSDNPEKVFNTLSQKGLIVEQKIDDMKRQYEVANKRKNDIALVTDSIADLPKELIDKYQIHVLPATITINEMTYFDKLSITNEKIYKNMEEKDFYPSSSQPNIKVIENLLKFLNEYYKEIIILSVSSKM…	Alteracholeplasma palmae (strain ATCC 49389 / J233) (Acholeplasma palmae)	99980 Enzymes with EC numbers	0.3261	589	38	66	61	49	1	0	DegV family protein with Dak phosphatase domain
U4KPH4	MKTKKLIITIFGSTGDLTARKLLPAITNLTKNKEISKDVLILALGRREYTKKDYLDYMQTLTSSKLDRDFLEDHLEYFKMQITELNDYHSLKNKINEYSDRNTQNLFYLAIGPELLENVSKNIFESKLVEKLSDRIIFEKPFGHNYDSAKEINQMLWQYFKEQQIYRIDHYLGKEMVRNIVNLRFGNKIFEHIWNKDNIASITVLAKEEEGILNRAGYYDTAGALKDMVQSHLLQVLSLIVMDTPLENTSEAIKDKKLEVLNHLEFDSKLSFLGQYEGYLQEKNIPATSQTDTFVFLKAELHSKLFENVPLYLLTGKKLDEKKSQIIIEFRSVSNQLNLEKETNKLYIDISPNEGVRFNLNHKVFGLNDESATSDMKYSIKDNLKDELPEAYEKMILDA…	Alteracholeplasma palmae (strain ATCC 49389 / J233) (Acholeplasma palmae)	00030 Pentose phosphate pathway	0	451	33	47	59	26	0	4	Glucose-6-phosphate 1-dehydrogenase (EC 1.1.1.49)
U4KKC5	MSNKKVSGNLFKKMVTNGAIHLKNNHKEVDHLNVFPVPDGDTGTNMQMTMMAGVKEVNTLESESIVDVSKILSRGLLMGARGNSGVILSQFFRGVYSELSKIDNGAVDPKQFIQSLVGGYQMAYRAVMDPVEGTILTVVRESAERVLKEQSNLNSIEEVLKVYLAQAKETLIKTPELLPVLKEAGVVDSGGAGFIKIIEGMLMALEGNILSEEELAAVSNLPKNEFEGAHNLGDIDIKYGYCTEFIVQLFNKDEFEIEQIRTPLGQMGDSMVVVADDDLLKVHVHTNQPGVALTLAQKYGELKTIKVENMRTQHSNIMGGSHDHNHEQDKPKSKYALIAVASGEGIQTALKELGVDHIIDGGQTMNPSTEAFVNAVKQLNAENVIILPNNSNVILSAEQ…	Alteracholeplasma palmae (strain ATCC 49389 / J233) (Acholeplasma palmae)	00564 Glycerophospholipid metabolism	0.4105	551	35	36	47	38	3	0	Glycerone kinase (EC 2.7.1.29)
U4KKM6	MEKINIKKTLSLSLSLIKKNFFRYVFITILIEFFLILLMNEIIKNVFNIALLTAKIDGISNDNFTAVFKNPIAVLILLLVVIISVILIILQVTITYYYASTDYKTQNSSFKKPLLALKKIKLKHLLILLVYIFLIMPNGNIGMSSGLTSKVHLPEFIVEAFFENTLLTVLYYTLILISFYLNIRLFYTFVIFTNEPLSFFDSMKKSWAKTKKNSLRILVIVGIISVIPFLLIGLSYLINLGLYNWLSSLFPSFSSEIKYILQEGLTFCYIIILSVSTIFLIQISVVSYNVLNKTPVIKEDLRLPKFSHYKKLRYSVFGVSFVLLVIIASLLTSIPKFTGNPKIVSHRGESVLAIENTLDALRIASTYKPDYVEMDIQQTQDKKIVVFHDFNLKRLANID…	Alteracholeplasma palmae (strain ATCC 49389 / J233) (Acholeplasma palmae)	00564 Glycerophospholipid metabolism	0	590	39	47	84	54	1	3	Glycerophosphodiester phosphodiesterase
U4KKP1	MDDTIKTYIEKMMFEGTPKRPAWAYNKINSDNIYTLKWSYDDAVMINAFIRLYEVTGNKKYLSFSNEFFKAYVSEDGKMLGYELEKYNIDNLCAGYTLMDLYRYTKENRYKIAYETLFKQFKNHPRTEKGSFWHKLIYPNQVWLDGLYMGQPFYAKYLKENNDKLNDVYLQFENMKYQYNKEKKLYYHGYDDTKTIFWSDPKTGCSKNFWSRSMGWFLMAMVDVLEIEKNKKLAIQLKQAIDGILLYAKEGLIYQVIDREDVKGNYLETSGSAMLIYAMIKGHRLGALSEKYLIKGKEYLKNLVSRKLINNNLQDCNLVSGLGPESNLLRNGTVEYYLSEKKVNNDPKAIGPFLMAYAEYIESEKIK	Alteracholeplasma palmae (strain ATCC 49389 / J233) (Acholeplasma palmae)	00564 Glycerophospholipid metabolism	0.4278	367	28	43	38	18	3	7	Glycosyl hydrolase, family 88
U4KKR9	MKILTTIYSKEALIENKDYLDGIITGNEVYATRLTHSFELDEILEIIDIANRLHKECFITLNQMYTNEHLEEVSQFIDKLPIDKITGYIIADIGVYMILKDKNLHNKAIYNPETLLTNYFDFNYLAETGIFGGFVAKEITLEDIKIINKNKKTHTFMVGHGHLNMFYSKRKLLKNYADYLNSKEDFKDKQDLLIIEEKRKDDPYPVLEDYAGTHVFRSKVFSSLEELSEIKKAIDYLVIDTIFKDDAYLKLILPMYYDNQINKETIDQLQSKYNESWDKGFLFNKTFYKR	Alteracholeplasma palmae (strain ATCC 49389 / J233) (Acholeplasma palmae)	01002 Peptidases and inhibitors	0.2579	290	19	32	31	11	1	1	Peptidase U32 family protein
U4KKT4	MTELLAPAGDLEKLKIALLYGADAVFIGGQQFSLRARASNFTVDDIKEATTFAHNLNKKVYVTTNIIPHHEDMHDLIEYLQALEEAKVDAIIAASPYIVDTALKHTNLEVHISTQQSALNTQTVQFWTEKKASRVVLGRELTVEEIKGITSSTDTEIEVFIHGGMCMSYSGRCSLSDNMTGRDANRGGCAHSCRWNYDLKENNESFSEEVPFSMSSKDLEAVHQITKLIDANVSSLKIEGRMKSLHYIATVVSTYRQMIDEYVHTKEIKDYEYYVKRLKKAENRLASSGFLEGVPGVEQQLYQMRSEKPSQNFIGIVLAYDEKTQTALVEQRNYFEVGTEVEVMSHEEPEKYFKIEKMTDLDGNDLDIARRPKEQLLIHTNIKLHPYDLIRCL	Alteracholeplasma palmae (strain ATCC 49389 / J233) (Acholeplasma palmae)	01002 Peptidases and inhibitors	0.2579	393	17	27	35	27	5	2	Peptidase U32 family protein
U4KK05	MSIEQTYRDSEEVLKISDIVEKYHRTYDTVIMTFQSKVLPGLLEENKIEVIEDLTFGNAHGKHHAYKVIGHDNMIFYLCPIGAPMAVGILEEIVYKLGIKNIVMYGSSGVLDKTITEGKIIVPTKAYRDEGTSYHYMPKSDFVDLRNYMKVSSILKESNIDYVEGYIWTTDAFYRETKEIFQERRNQGCIAVDMEVSAVEAFSRLRNVNLYNFVYGADNLDSEKWDKRILGNLSLSSRVNYFLIALLIAKKISR	Alteracholeplasma palmae (strain ATCC 49389 / J233) (Acholeplasma palmae)	00230 Purine metabolism	0	254	13	19	20	18	2	2	Predicted nucleoside phosphorylase
Q847R4	MHTGIGTSPYHIKYKFNSTPKKIIDIAIEAVKYAKKFVEDVEFYAEDAGRTENIFLAQICEAVIKAGATVINIPDTTGYCLPEEYAEKIKFLKENVDSIDKVTISTHCHDDMGLSTANSIAGIINGAQQIECTINGIGERAGNTSLEEVVMIIKQHKDLNFYTKINTKLLYKTSKLVSECTSMFVQSNKAIVGANAFSHSSGIHQDGLIKKRETYEIIDPKDVGVNKSSIILTARSGRSALAYRYQKLGYSFNKSKLNVIYSLFLKYADKKKEIDDEDLKKILKKMKYS	Aster yellows phytoplasma	00620 Pyruvate metabolism	0	289	15	35	18	22	5	0	Isopropylmalate synthase
Q2NIN3	MKTKYSYYNNQLTLIHQGKIVFLKGFIFRKRNLGKTLFFDLRDVSGIVQLLVKENNPQYDKIALIKLETVVQIKGQVIERINKNPDLPTGDIEILVSHIEILSEAQTLPLNVFQSQESLEETRLKYRYLDLRNPEVKHFLIQRHHITQSIRQTLLKNDFLELETPILSKSTPEGARDYLVPSRIYPGNFYALPQSPQLFKQLYMIAGFERYFQVARCFRDEDLRSDRQPEFSQIDIETSFLNQDEIMSLTEEIIVDLFANIWKKPLLQPFLRLTYQQAFELYGSDKPDLRNPLKITDFTTFFDTNTYSQNIFAGKIKGFKVSKTAFLTRRKLDEYQLFFSKHFNLKLFSFVKKNDKIIGGISQFIQDDSFLKNEEICFVVSGKKDIIHKALGIFRTKLA…	Aster yellows witches'-broom phytoplasma (strain AYWB)	00970 Aminoacyl-tRNA biosynthesis	0.255	576	32	44	77	31	3	3	Aspartate--tRNA ligase (EC 6.1.1.12) (Aspartyl-tRNA synthetase) (AspRS)
Q2NK04	MNNKDLKTKFIFITGGVVSSLGKGITAASIGQILKNRGLKVSIQKLDPYINVDPGTMSPYQHGEVFVTDDGAETDLDLGHYERFLDENMSKKSNVTAGQIYQSVINKEREGKYLGKTVQVIPHITEEIKQKLTDAALFHKSDVVIVEIGGTVGDIESSPFLEAIRQVRFDFGYRNVLYLHTTLVPYLKKTKEIKTKPTQHSFKELRALGIQPQILVLRSEVPINQETKNKISALCDINSQAIFEALDVDILYQMILNLNHQGIDDFILQHFKLTNFPTADLQAWQQLITRIQNLEKKVVIALVGKYIVLHDAYLSIVEALKHASYQYNCKLEIKWIDAEKVTSDNISSFFEDCDGILVPYGFGNRAIEGKILAINYARTNNIPFFGICLGMQLAVIEYA…	Aster yellows witches'-broom phytoplasma (strain AYWB)	00240 Pyrimidine metabolism	0	536	32	42	54	29	6	3	CTP synthase (EC 6.3.4.2) (Cytidine 5'-triphosphate synthase) (Cytidine triphosphate synthetase) (CTP synthetase) (CTPS) (UTP--ammonia ligase)
Q2NIP7	MLQIYNSLTRKKEFFKPDHPPQINIYVCGPTVYNHLHLGNTRPLIFFDTVKRYLEMLKFKVYYVVNITDIDDKIIETSLKNQVLEKDLANKYIKSFNNLLETLNIQTINFKPQATQYINSMILYIQTLLDQGFAYFTDQGIYFRVSKITDYGKLKKQDLSQLKQNVRKQLDPQKEFPGDFILWKKTSQGITYPSPWFAGRPGWHTECATMIEQLFKLPLDIHGGGTDLKFPHHENEIAQTHAHSHQKLANFFMHVERLDYQNQKMSKSLGNIIWCKDLLKQYNPCIIKFLILSTHYRKPINFSYDLMEQTQQKYKKITYFLTKNNFYLKVNHFFCQTLDQDIMQLFHQLMQDDFATHKVIDLMEQIIKRAHQTQILDKLSQFQNSLLLILNTLVIAIPF…	Aster yellows witches'-broom phytoplasma (strain AYWB)	00970 Aminoacyl-tRNA biosynthesis	0.2743	438	25	44	51	15	6	5	Cysteine--tRNA ligase (EC 6.1.1.16) (Cysteinyl-tRNA synthetase) (CysRS)
Q2NIT5	MISIQNLTFYYGCNPILKDINLTIQNNSWVSIVGHNGSGKSTLAKILLGLLAFNKGQIVIDNIVLNEKNLPILRPKIGIVFQNPDYQFTGLTVREDIAFGLENYNVCREEIIAKVLKYAKMVKIDDLLDKNVNQLSGGQKQRVTIASILAMEPEIIIFDEATSFLDPQGALEVQKIIQTIKNKILITITHDLDFASKSDEIIVLYQGKLITQRPPKNLLQDPLFLQQYKLTPPLSLQLYYEILKDSTTKKIKNNQMLENLKDILWQYNLKK	Aster yellows witches'-broom phytoplasma (strain AYWB)	02000 Transporters	0.5478	271	21	26	37	12	2	2	Energy-coupling factor transporter ATP-binding protein EcfA (ECF transporter A component EcfA) (EC 3.6.3.-)
Q2NIP6	MKKIKVRYAPSPTGFLHIGNARTALFNYLFAKHNQGEFIIRIEDTDFSRNVKGGEASQLKNLRWLGIDWSEGPDIQGPFGPYRQSERLAIYQKYAQKLLDQGLAYKEFQENTTTFAIRFRVPTNQTFSFDDLIRGKLTFQSQEIEDWVIIKSNGYPSYNFAVVIDDHLMQISHIFRGEEHITNTPKQIMIYQTFQWHLPQFAHMTLILNDNKKKLSKRDANIMQFIEQYEKLGYLPQALFNFLSLLGFSPLSQTEILSPQELINLFDVARLNKAPAMFDTVKLDYLNNQHLRKLTPEVIASFIVQKKYLTLTTAPTNDKEWMTKFVSLFQDRMNYIQQIADFYQLFFQTKPSLSQEATIFLQTNPQTTLILKTFYNVFDVIVFKKDVIFNAIKQVANQN…	Aster yellows witches'-broom phytoplasma (strain AYWB)	00970 Aminoacyl-tRNA biosynthesis	0.528	449	26	37	50	22	1	5	Glutamate--tRNA ligase (EC 6.1.1.17) (Glutamyl-tRNA synthetase) (GluRS)
Q2NIZ6	MIKRKKLYFMKITIIGSGAWGSTLAQVLTDNNNQVLLYDTNLSYVEKINQGKHPIFNTPLLNVKAVSCLKQTLEYSDLIVLAVPMKFMRHLLKKITLMLTNPKSFVNVSKGIEPLTFLRVSEIVKQVIPAPLLANFASLMGPSHAEEVILRKLTLLTAASSNPVFSLEIQKLFSCPNYLKVYTSSDLVGNEICSAFKNILALINGILVAKDFGINSQAALMSRGILEMSRLVTFYQGNPQTVLGLPGLGDLIVTAFSKYSRNFNAGAKIAAGIPYQQIIDSSLQTVEGFQTLNAFYQLQLKHNLDLPIIQASYQLIFESKPFDTVFATLIQRPYKSEF	Aster yellows witches'-broom phytoplasma (strain AYWB)	00561 Glycerolipid metabolism	0	338	21	24	47	27	3	1	Glycerol-3-phosphate dehydrogenase [NAD(P)+] (EC 1.1.1.94) (NAD(P)H-dependent glycerol-3-phosphate dehydrogenase)
Q2NIK0	MHFVDEAFNEVFAGNGGHGIVAFRREKYVAFGGPAGGNGGNGGSVIFVGDKGENTLLKLKYQKHLKAPHGINGKNKGQNGANAPHLYVKVPLGTVFYTADNKFLGEILYDQQTLVIAKGGKGGKGNKALATFKNQAPSYSEKGDLGESFKIKTELKVLADIGLLGFPSVGKSSLISAISKAQPKVASYPFTTIKPHLGVVEVDGFSFVVADLPGLIENAHLGCGMGIQFLKHIERCRVLVHILSMESSNPYQDFQTLNQELKQYNPQLLLKKQIIVTNKMDLPDSLKKLTLLKQKIKGQPIIPLSLVSFDNLEILKYKMSSFLQNTPLEVNPNNNNDFKLYTLTDNLKTISVIKESDSVFVVSGNQVEIFFHRTDFNNEESVKRFNRILKKIGMEEQLQ…	Aster yellows witches'-broom phytoplasma (strain AYWB)	03009 Ribosome biogenesis	0.256	419	29	45	46	24	3	0	GTPase Obg (EC 3.6.5.-) (GTP-binding protein Obg)
Q2NIH1	MKLNKKGLLIILSGPSGVGKATVRKALFEMTNHNFVYSVSATTRKPRPGEQDGKDYHFLTKEEFEKGIENNCFLEWAKFIDHYYGTPKKQIQDFLKQGKEVFLEIEVEGATHLRKKRMPNTVFIFLVPPKKKDLYDRLKKRGTEQEINIVQRIAKANNEFRLAHKYDYIVVNDEVANAADRIIAIIRAEHAKTKRSIRNYLKILEDNVYAE	Aster yellows witches'-broom phytoplasma (strain AYWB)	00230 Purine metabolism	0.5149	211	13	26	16	5	1	1	Guanylate kinase (EC 2.7.4.8) (GMP kinase)
Q2NJE3	MKTKSKKLKSDLSIGEFEDIFQEIPEQLPVVVISEIMPIPNVDFRIEVSDNSYLKALKESETNANSFVILLTQKGLSHNKPKLTNLQRYGVLAQIITKVKIPHGDFKVRFRILQRVKIDKFLQKEPFLKVSYEKVKTVYGSIEEEKALIKLVIEKIMDKPFQLLVQNTNNFLDIIKTEPETENITDIIIFNLKIDDLDKYKYLKESHLNKRIFYILQDIQSLLIGLDLEQKINEKVKQSIDENQKEFYLREKMKAIQLELGDKAKKEEEIAELRDKIKKTPLPPEIKKKALQELSRYQTSSLMAESFVIKNYLDFLLELPWGKTSQDENDLVAIEKSLNNQHYGLQKVKERILEYAAVKIMTKKNPQNILCLVGPPGVGKTSLASSIAKALGRQFVRQS…	Aster yellows witches'-broom phytoplasma (strain AYWB)	01002 Peptidases and inhibitors	0.5746	791	44	89	94	41	3	1	Lon protease (EC 3.4.21.53) (ATP-dependent protease La)
Q2NJZ3	MQTKIKKLIAQFHTSLQKNKYDLDKLMILDKEFLGKKGILFELTQELKNLPHAQKSVAGKLINFLKQEIIFTLQKEKETLKRNQLNAKILQEEIDPTLPAFNFCQGSTHPLNQIIEKIEDLFLSLGYEIKEGNEIETLFYNFEMLNMGKGHPAREMQDSFYIDSQKLLRTHTSNIQVKEMKARQGKPLKIISSGKVYRKDDDDATHSHQFMQLEGLVIDKNINFSVLKETLLLITKELFGNSQEIHLRPSYFPFTEPSIEVDLVITKKDGTKEYLEILGAGLVHPQVLKNANYDPEKYQGFAFGIGIERIAMIKYQIENIRYFYANDIRFLKQFARNADNENY	Aster yellows witches'-broom phytoplasma (strain AYWB)	00970 Aminoacyl-tRNA biosynthesis	0	343	21	37	40	14	1	0	Phenylalanine--tRNA ligase alpha subunit (EC 6.1.1.20) (Phenylalanyl-tRNA synthetase alpha subunit) (PheRS)
Q2NJZ2	MQGTPTMKIIENILKNHLLQPLSQNIFVLTNNYITEVQKFSPLSKNTNLVVGQILNFQKIQDSQKLNLVEVNIGIKVVKIVCGASNLQNGKKVIVASEGSFLEGINSTLKNKKIYGVFSEGMLCALEELGISNKFLTPQEQEGIYLFDDPNDQIALGSNALIPLGMDGFILELGITPNRGDLLSHIGFAKDLQAVLASQNSNKKKEKKTINYKTKNSKDQTNRKTTPKLNPDFFAKLPQSPLKVQIESDSCYEYNVCILENITIKPSPLWLRNTLLQSGINPINNVVDITNLILIEYGIPLHAFDSGTIQKIKVRKAFPQETITTLNQNDFVLDENDLVITDGKKAIALAGIVGLLESSIKPTTTKIILEAAYFSPQTIAQTCQKLKNKTESSLRFERG…	Aster yellows witches'-broom phytoplasma (strain AYWB)	00970 Aminoacyl-tRNA biosynthesis	0	828	60	79	103	50	11	3	Phenylalanine--tRNA ligase beta subunit (EC 6.1.1.20) (Phenylalanyl-tRNA synthetase beta subunit) (PheRS)
Q2NK36	MNKDQVIKFIDGQLFKNMITNGAINLQNNYQTIDNLNVFPVPDRDTGTNMKITMMSGVKEISNLEVRSIVEVSQILSKALLMGAKGNSGVILSQFFAGMAQTYQTINKETININDFIHSLEGGYKKAYQAIIEPQEGTILTVFREAVKQTLKAKSQFNTIEDVLSNFLQNAQKALSQTTELLEVLKQAGVVDSGGAGFVEILKGMLLFLREKKLLQVNQNKQTHTAPDKIQTLGQVNIKYTYCTEYIFQIKESQEKNLDMKQIKKVLLQIGDSLVLVKDQEILKIHIHTNKPEKVLEKLLTYGTLKVRKIENMKEQCQSILDKKHDKFTPEKEPNPDHKQPSNLPKTNKDQKYFFIAFVNDTKSQKVFADLKVNHIIKQSTFKPTNFAKLLQKNTAQNI…	Aster yellows witches'-broom phytoplasma (strain AYWB)	00230 Purine metabolism	0.5635	571	47	70	62	25	4	1	Predicted kinase related to dihydroxyacetone kinase
Q2NK66	MFLEKEQDNLDNLKTQTKELHKDYTECQNCQKEETQTTNKDNQKEDETFKNQPNKTKQTNTKQQKHLSKESSHQQITKLQTQIKELQQKLSQQKKTFDEGLLKNQAEFINFKKRAQTQKENELKYASSNFINNLLMPLEQLEKVIDMPTQNELLQKYLLGFKLLQKQIKKVLQDEGVEEIEALNKPFDPTFHHALETVCDFEKPDKTNLAVLQKGYLYKKRILRPTLVKVNEWSDKNEKNE	Aster yellows witches'-broom phytoplasma (strain AYWB)	03440 Homologous recombination	0.3103	241	20	38	29	7	3	1	Protein GrpE (HSP-70 cofactor)
Q2NJ22	MLYFESLKDKFKLNKKQLNKFVFYYEFLKKENQKMNLTSLISLSDVCYKHFYDSLILKEIFDFNNVTNLCDVGSGAGFPSFPLKILYPHLKIIIIESSLKKINFLKQLASHLELDNVCFFHKRVEQHDIAKNGSYDFVVARALARLEIILKWCVPLVKKRGYFIAMKGKNFQQELEASKKIIKQMKVKLVSAKVFELPMQLGTRTNLLFQTE	Aster yellows witches'-broom phytoplasma (strain AYWB)	03009 Ribosome biogenesis	0	212	12	29	29	13	4	1	Ribosomal RNA small subunit methyltransferase G (EC 2.1.1.-) (16S rRNA 7-methylguanosine methyltransferase) (16S rRNA m7G methyltransferase)
Q2NK31	MKTLIILKDLTKVFDNQLILRGINLEIKQNEFVTLLGPSGCGKTTILRILGGFENPSSGEVLFQGKSILNVAAHKRPINTVFQKYALFPHLNVFENVAFGLRLKDFNSKIKDNLDINETHYKTSKANLSKTFHQELTKDLAQEKTTQITNNFNNQIEALTKDFEAKQTALKCKKINKKEQEEQIQKEVLKYIKIMGLQGLEKRTIEQLSGGQQQRVAIARALINKPQVLLLDEPLSNLDLKLKQEMQYELKEIQKNSGITFLFVTHDQEEAFTMSDKVVVMNNGEIQQIGSPEDIYNEPANRFVAQFVGESNLIKGVMKDDFLVHFDNQTFNCVDKGFRKEENVDIVIRPEDIDIVYQGKGLITGIVQSIIFKGVHWEIDVKTAQRTYIIHTTDHVELN…	Aster yellows witches'-broom phytoplasma (strain AYWB)	02010 ABC transporters	0.3019	417	30	42	40	14	3	2	Spermidine/putrescine import ATP-binding protein PotA (EC 7.6.2.11)
Q2NIY4	MFISFEGCEGTGKTTHSSYLFEKLSKKYSCVLTKEPGGGLFNEVIRNILLHSYNKQIDFHTEALLFAADRAEHLSKLIIPALQQNKIVICDRYLDSTIAYQVYARGLSKDFVLNINNLALNYMPNITFYLDLDPKIGIQRVKQFRPKEINSFDLQKLSFHKKVRKGYLDLYQKDQQKRIFLIDASKSLEKIYNIIEQKLKEVFQIDL	Aster yellows witches'-broom phytoplasma (strain AYWB)	00670 One carbon pool by folate	0	207	11	22	26	13	3	0	Thymidylate kinase (EC 2.7.4.9) (dTMP kinase)
Q2NIQ6	MTLNKKTNNENSSKTTPKLSKKTDFQNDFASKNYVFNPQDKVFQIAQVFGITSAVLIKKLLQLGLKADVNQTLEKDIVELLAKEYNIKVIEPQKEQTPPQLQPQKPPLTKSKLQAKPNQKLNLQKTPPIVTIMGHVDHGKTTLLDAIRKTRVVDQEFGGITQHIGAYQVEYQGNKITFIDTPGHEAFDKMRARGAKITDICILVVAVDDCVKPQTLEALKHAQKAQIPIIVALNKVDKPNNKTQQIMQELSSYDLLPEEWGGTTPYIAISALKREGLEKILEIILLFSEIQNLQTNPDQKAKGTVIEASLDKSLGPVATFIISDGNLKVGDIVVAGTSYGKIRSMEDENKKTPTKALPSQPVRVSGLKEVPQAGDIFYAVSNEKQARQIVSEKKTKTKE…	Aster yellows witches'-broom phytoplasma (strain AYWB)	03012 Translation factors	0.3407	623	32	74	57	34	4	1	Translation initiation factor IF-2
Q2NIG1	MFFDTIAAISTPLGTGGVSVIRVSGNNSITEINKIFKGKNLIKAKTHTITHGFILNKDQTILDEVLISVFKTPNSFTGENVVEINAHGGILITQMVLERILSLDIRLAFPGEFSQRAYLNGKMDLIQAESIMDLIHATNENAIKIANSGLQKYTSQLVTSLRDQILNLIAQIEVNIDYPEYDDIPQITQQKIALEVQSLIKQLENILSHSHKNRYLKEGIKTLIIGRPNVGKSSLLNAFLNENKAIVSDISGTTRDFVEAYFNCRGFTLHLIDTAGIRKTDDPIEKIGILRTEKMLLQAELILLVLDQSNYLQEEDIQLLQLTQNYPRIIIGNKVDLKSDKLISSLCDYSSQLTPQEIISVSSLDKTGFFELQQTILKKFQLNDIKPKDFNYFSNARHI…	Aster yellows witches'-broom phytoplasma (strain AYWB)	03016 Transfer RNA biogenesis	0.5871	460	30	32	57	34	3	0	tRNA modification GTPase MnmE (EC 3.6.-.-)
Q2NIN4	MENIKLACSLETNQTYIIAVSGGVDSMALLHYLVAQKIKLQVVHFNHLTNSNTWKNKELVKNYCLQNSLGFHYFELNCPQKNFQAQARLLRQQKLMQIAAKHRTPFILTAHHLDDLAETILQKISRSSTLLGYSGMQIQTSWTDFIFLKPFLYIPKAKIISYAAFYKIPFLEDYTNQKLTYQRNQIRHQVIPYLKTQTSFLQNIQKYQQTLLQAYNFIRKQTLLFLTKHTNHSCNQPNSIALAPFLNLDLVIQKDIILLLLEQKNITQSFIFIQNIIKGINNPYKPNLSWHLNSDWHLIKDYKHIKLMNPALPLPFALTKPLLCVSTCNLCLVCVCPLIETLNYNSQKVSFPLKVRLRQPKDTLKFSFGTKKLKKFLIEKKVPLTQRNNLWLVVDNLDN…	Aster yellows witches'-broom phytoplasma (strain AYWB)	00970 Aminoacyl-tRNA biosynthesis	0	436	37	38	66	24	10	5	tRNA(Ile)-lysidine synthase (EC 6.3.4.19) (tRNA(Ile)-2-lysyl-cytidine synthase) (tRNA(Ile)-lysidine synthetase)
Q2NJG7	MSFYEELKWRNLIKDCNNEIQVKELLDNNQVKFYCGFDPTSHSLTVGHLIQITMILLMQRQGHLPVILVGGATGLIGDPKETEERKLLSLENSLQNAKSIESQLKTILLNKQVEFVNNYQWLSQIDIISFLRNYGKFFNINYMLSKHVVAKRLASGISFTEFSYMILQSLDFHHLYKNHKVRLQLGGSDQWGNITSGLEIIRKLEKKSDALGVSTPLLLNSDGTKFGKSEKRVLWLNPLMTSPYEIYQYFLNVSDKEVINYLKMLTLIPKKGILELEKKTLENPQKRLAQKALTQSIINLIHSSDILQECIKTNQILFSNAKKESFQEKDFILLQKTLFCHSIKEDILLVDALVQTKLATSKSEAREFIKDNTIKLFNQKIKSLDFIITKENTLFGKYI…	Aster yellows witches'-broom phytoplasma (strain AYWB)	00970 Aminoacyl-tRNA biosynthesis	0.5516	413	28	46	61	31	4	4	Tyrosine--tRNA ligase (EC 6.1.1.1) (Tyrosyl-tRNA synthetase) (TyrRS)
Q2NKB3	MSKDDSIKKTVTIGLSTTIFFVLSCFASIPVGFNVSIETSAAFLAFIAVAFGPSVGFYVGLIGHIIKDFFLFGNVSWNWVLCSALIGFIYGLPYKIIDLKYQVFTKKKIVYFWLYQVACNFIIWGFFAPQSDLLIYGQPPKLVYLQSFLIVISNILAYSVVGIKLMTIYSCHYTKQATLMKINNS	Aster yellows witches'-broom phytoplasma (strain AYWB)	02000 Transporters	0.5902	185	7	13	18	16	4	4	UPF0397 protein AYWB_013
Q2NJ78	MSILLEKIKTLPPNPGCYLFKNTKDTIIYVGKAKNLKKRVQSYFTKRNNLKTAMLIEETQDFFYIITNNEQEALILEANLIKTHTPKYNFKLLDDKTYPYIEITKEKHPQLKISRFKQIPPGKIIFGPYPNLKSTKETLKLLHLLYPLRRCQLASKKPCLHFHINQCLGACAGKTINYKPNIDAITKFLKGNIKDILKKLHHLMQKASEKMFYEKAQEYRDIIDSIKQTTKKQLISNQKLKNCDIFAYAFNQDQIAIQILKIRQGNIVDSYRSVFSYVGFVCENILTYLNCYYQKNIKPDIIITGKNQDENILQQTITNQTLLEQILQTKVNIYHKGDKKKLFLLALKNAQNDLSHNNLIYQSKDQKIQEALNKLAIIFNKDIKRIDVFDNSQLFGKAF…	Aster yellows witches'-broom phytoplasma (strain AYWB)	03420 Nucleotide excision repair	0.5926	589	42	81	72	22	9	0	UvrABC system protein C (Protein UvrC) (Excinuclease ABC subunit C)
Q2NK75	MNIKEKALEMHEKNKGKVGVVSKVKVQNLDDLSLVYTPGVAEPCLKIKENPSDVYRYTMKGNMVGVITNGTAVLGLGNIGPKASLPVMEGKAILFKELAGIDSFPICIDSTDSQEIVNIVSKISTVFGAINLEDIKSPQCIEIEDALKAKLDIPVFHDDQHGTAIVVAAGILNALKVVKKSIEDVQVVINGAGSAGMAIAKMLLLLKVNNVVLVDKTGTLYKGVANLNEPQKKLVEVTNKYQEKGTLKEVLKGKDIFIGVSAPGIVTAEMVATMAKDAIVFALANPVPEIMPDEAKKGGARIVATGRSDFPNQVNNCLAFPGVFRGTLDAKATQITEEMKKAATYALKNIIKEQDLNENNILPTSFNKEVVKQIALAVCKVAKETGVVRK	Aster yellows witches'-broom phytoplasma AYWB	00620 Pyruvate metabolism	0	390	25	44	32	15	5	0	malate dehydrogenase (oxaloacetate-decarboxylating) [EC:1.1.1.38]
Q2NK74	MSIENEQSSPDNKENNNNNKDSKNVNSVFVPKKTILGFSVPLFFLMILVVFVQVFVLGFVSFKTTNKFEPVFHPLITPLLIAMLLAAVLQKIGAKTPLLKDIGGGSILCILVPSILFTYPFFKDGSIFLQMQNFMRIIMKHLNAESITVKIQETKYTYKAVGFSNFFVSALIIGSFLSMDKKLLKSSFKKFIPLILVSLITGALFVGTLGALLHPIGGLENASQTSKGAFLDAVFYIFAPLASGGMSSGVTPLKNAYAGQNLDLQEPFMSHMTPALLVGGIFSIFASGLIKKFVKTTKYSGYGKLEVKDVPKNPNKNTYKLVPEKLSYHQITTGLIAIFTLYLFSVLIKESLILLLPNIKKYLPEYIVFLVFVVVLMKLFNVVSDYYNSCINQASKFVT…	Aster yellows witches'-broom phytoplasma AYWB	02020 Two-component system	0.5508	511	27	41	69	43	5	0	malate:Na+ symporter
Q2NIK3	MKKEIAIKIRDLTVAYHLKPVLWDIDLDIYQSSLTAILGPNGAGKSTLIKTILELIHKISGEVLFYNQKYGQLRKKVAYVPQRNSVDWDFPTTVFDVVLMGRYGHLGWFKKPTAKDKEIVMQSLEKTGMQDLKDCQISELSGGQQQRIFLARALAQQGDIYFMDEPFQGVDIQTEKKIIQVLKDLQKENKTIIVVHHDLETVTQYFDHVVLLNVQKIASGTTDEVFNKTNLNKTFQNKKLKKDIHNLQTPKKTK	Aster yellows witches'-broom phytoplasma AYWB	02010 ABC transporters	0.3304	254	10	31	26	9	1	3	manganese/zinc/iron transport system ATP- binding protein [EC:7.2.2.5]
Q2NIS6	MEVYMIKKRIITGGTLVLFSFFFYYCAPLEIKFLVFASLVIKAVQEMFFILNHPKDTQKQTFIKFGLVATSTLLFFTGVCLILYQNICQNNKLRNDFLLPFKSFLSYLKQPLFNYYFFLLLFLPFLLVLIMLVFLPFLQTKDVSKTFLITFYIGFLMACLFSLFFLHWHYFFLFVLSVMFTDSFAFLARFPCFCPFLGTSSLAPHLSPKKTQKGAILGTFGSTITVLIVFLFLKCDSCIRFSIYTFLISIISQISDLLASKFKRDYGIKDFGSFLPGHGGFLDRFDSWLLSSFFALILFNLPF	Aster yellows witches'-broom phytoplasma AYWB	00564 Glycerophospholipid metabolism	0	303	7	19	52	23	8	2	phosphatidate cytidylyltransferase [EC:2.7.7.41]
Q2NJ09	MCFVFKPKLQHQTTSKSKLKTFNFKKILLLLRQTHFASRNQVKEFFNFMGIKIVSENKKNQLLEVIKREYSWLNILLIITSILSLALCGQLWQTKHFETMHWTFPCALVLLSFFIFAIGSFSFFKDAFLQICNIIWPSLKQILFNTLQVIFFTLFLILFVHTIDSYVIGKLTKFCVEIKNLLSK	Aster yellows witches'-broom phytoplasma AYWB	03060 Protein export	0	184	9	19	28	13	5	4	preprotein translocase subunit SecE
Q2NJ42	MNKTKIICTLGPASYEKNILQALIQTGLNVARFNFSHAQYEQTKLLMKTIKTISDKLDKHTGLMLDTKGPEIRTHKLDGLVTIQKDSEVRISMTEVLGNAKLFSVSYTNLYNELKVGDMINIDDGYLSLEVVGKDESKQQLVTKAKNTHSIKSRRGVNVPKVNLEMDFISPKDYQDIVFAAQQDFDYIAASFVRKSQDVQDIRKILQEQGNSNIQIISKIENQEGVDNLEEIIQESDGIMVARGDLGIEVDGELVPLYQTRIINKCLEYGKPVVVATQMLESMQRNPRPTKAETSDVFNAVKEGTTFTMLSGESASGEYPVEAVTYMKKINYQAEKVVNYQALSQVYQPKNFKENLLLSAVELAFRTFVKAIVVYDLEDAYNVSKFHPSVPVLALVKTE…	Aster yellows witches'-broom phytoplasma AYWB	00010 Glycolysis / Gluconeogenesis	0	446	26	41	41	28	3	0	pyruvate kinase [EC:2.7.1.40]
B1V9D6	MYLEINKDVFLKQLLKIYKILPQKSLFPVFNILKITAKKNTLILEVNNGNIAIQISIEDQSLKIEKEGEIACFGRHFIEIIKKINTLSIKMTVTENNFLVIKTNFCEYKLKLMTLLGFLLPEFFFEKKEFFELKVSSFKKMIKEVNISSSKNEKRPILTGSNLIYEKKTLKALATDSFRISYKKIKLDFPYFDFNMVIPNKSLEELIKILEYYDNKNLKIYSDDKKIFLKIDNLWFCTSLLEGNYPQIQEFNLKNYPFVVHLNKDDVMKVLERISLFFSKEEVNKNIVLFKLTEEKIIEISISNENLGTALEKIIPLKVTSEKFEIAFNAKHLEDILKVLTSSEIVFYFESHLKPFIVTTLEEESSVHLIFPIQKEND	Candidatus Phytoplasma australiense	03030 DNA replication	0	378	28	51	47	25	3	1	DNA polymerase III subunit beta [EC:2.7.7.7]
B1VAI6	MKKTKKSKSLLETAYEIAKKQNKPIYIFDLLEQTQKKHQIEELKDYKKINQLYLDITLSGQFVFCDEKHLIIKENHKEHWDKDFFEKPKNNQEEDSELQKLDLEDVVSEKPEDEDEDTSNKDDELLKNNDHDEVLDEDDKEEDSEDLSDDYEYFL	Candidatus Phytoplasma australiense	03020 RNA polymerase	0.2917	155	8	24	17	8	1	1	DNA-directed RNA polymerase subunit delta
B1VB38	MFQWFKNKFFKKKNSDKYQLGLAKTKGNFVNFETLLKEAKNIEESLLSALENILIESDFGVKTTLFLMQSIKNYLNQSNIKEARQLPSIIIKHLLHLYQDSSKQSQTPILNTNSKTTLTDPQMYLFVGVNGVGKTTTIGKMATKLRQEGKKVLLVAGDTFRAGAVEQLKIWGNWSQTEVFAKEGTLFPSPSSVIFEGLQYAKKNAYDVVLCDTAGRLQNKANLMQELAKIQRVILKHLNPENLQSFLVLDANTGQNALNQVELFNEAVPLTGAIITKLDGTSKGGIVFAIKHLYNLSIKFIGLGEKPEDLVDFDIQNYLFHLFNNFFLKNI	Candidatus Phytoplasma australiense	03060 Protein export	0.517	331	27	34	44	18	1	3	fused signal recognition particle receptor
B1VAX9	MNASPTSPEKKNNKKTILGFSLPVFGLIILLVLIQLLGLKWLGRGKDNFHPSTHPLITPLLIALLLAAFLQTIGKNIPILKDIGGGAILCIIVPSILFTVPIFKNAPLLREMQKKISLSFQNLSGGGENKIGFTSFFVSVLIIGSFLGMDKKLLKNSFKKFIPLILISLITGVLVVGILGYFLQPIKGIKDSVALSPKENILNAIFYIFAPLASGGITAGIIPLSSSYSLASSGNATDFEAMKSHIFPALLLGGIFSILVSGIIKKLFQKSKLSGNGKLEIKTSLSQTQAKPTPKTEPNFDSNKFITGVIAIFSIYIFSVMLRDLAVLRFPQIKKYLPDTIVFIVFVVILIKLFNLISQDYINCIVKTSQLITKNLTSTLLVILGSTLQIAKAWKHLQN…	Candidatus Phytoplasma australiense	02020 Two-component system	0.5688	488	22	39	71	41	5	3	malate:Na+ symporter
B1VA75	MNNLKRIKVIAGNWKMYKDKNEALEFIQKVNFSIPNSKEVETIIFAQSTLLDVLVQNQGPNLKIGAQNAFHESEGAFTGEISPLNLVSLGVKYVLLGHSERRVLFGETDQLVNLKLLKALQNNLSPVLCLGETLETKENNKTKEFLEKQLTQALKDVPQEDLEKILIAYEPVWAIGTGKTASPQEANQTIKQIREKVTNLYSAQVVQSLKILYGGSVSSNNVEAILEQNEIDGVLVGKASLETKDFLNFTQAAVKLSSNCCQHFDKKC	Candidatus Phytoplasma australiense	00051 Fructose and mannose metabolism	0.5766	268	22	26	34	17	4	2	triosephosphate isomerase (TIM) [EC:5.3.1.1]
A0A975FIP4	MKIGLFIDAYAPSIGGVQTSNITLKESLEALGHEVYIITLHAVPRQKETDPYVLRLNGGIPLYIKGLKGYRLLIRYKKFLPKIESLNLDVIHVHTEFGVGHLGLYASKKLKLPLIYTMHTMYHCFIQKNNFVYLKLFKKMITKFIDKLLKKLINEANIIIAPTQKTLLFFKDYYKIEKNYQIVPSGIKLKKFYSTSYKKEEIDILKEKLGLKDFFICLYIGRVSEEKEINIIIDYFSDFYKKNKKSKLLIIGDGPNKIKLQKQVKKLKLTENIIFLNFVPNNEIGLYYQLGDVFVGASLFETQGLTYIEALSASLPVLARYDTALDQVIQHNQNGFFFRNKEEFVQNLNILYNDKKKYYEMSNNAEKSVHNYKQEIFAQKIIDIYQKAIEENNNK	Candidatus Phytoplasma luffae	00552 Teichoic acid biosynthesis	0.5075	395	27	52	47	16	2	0	1,2-diacylglycerol 3-alpha-glucosyltransferase [EC:2.4.1.337]
A0A975FIU2	MSLYIKKKIEYLTEKLNKANYEYYHLNISKLSDNQYDASLKELFLLEKQYPNYKLPYSPTLKVGGVISSKFDKAKHKIPMLSLDNVFNFKELKEFCDRLFKKNIPFNFITEFKIDGVAISLKYKDGILFQALTRGDGMVGEIITENVKTIKNIPLKLNKKIDLEVRGEIFFDHDSFEKLNQNNKKENKILFSNPRNAASGTLRQLNSSIVAKRNLSSFIYSIVNTPSFIKTQKQVLIFLKEMGFSVNNYNDTVNSFEELKNKIIKYENIKNNLPYNVDGVVVKVNQLNLYPLIGYTTKFPKWSVAYKFNSLKSETIVKKITFQIGKTGAITPIAHLEPVIIDGSLISKVSLHNYDYIKTKDIRINDFVLIHKSGSIIPQILEVIKEKRTNQIPFQMITN…	Candidatus Phytoplasma luffae	03030 DNA replication	0.5485	665	66	98	69	42	5	1	DNA ligase (NAD+) [EC:6.5.1.2]
A0A975INP0	MLNNSKEINSLASMAELSYQILQQNKQPMAVEQLIKKVFELKKIDFNNKEKFIQLYLDIVLSGCFVFVGDNLWDVKKDNLNLWDQEYFANPTSDEEISTKEEDIEDILDFDEFESKSDENKDNTNEDIKEFKEEKLDLNIDEDEDESGILNNLDENLEEEEIFEVDKNKNDEYEEEITPDYYEEYYNE	Candidatus Phytoplasma luffae	03020 RNA polymerase	0.2957	188	20	18	18	10	1	2	DNA-directed RNA polymerase subunit delta
A0A975FJJ8	MDLKGQKLIDSINTKKLRNVPDFKPGDMVKVFTKIEEGNKKRIQIFEGLVIRRKGSNITENFTVRKVYSGIGVERIFPIHSPSYEKIEIVRRGMVRRAKLYYVRDLSNKAIKIKEDKQIK	Candidatus Phytoplasma luffae	03010 Ribosome	0	120	6	18	6	6	0	0	large subunit ribosomal protein L19
A0A975FHR2	MDIVNKFQYLLMNISGFSQIFISCFLLGIAAGITGLFMVLQKKDLLGDTLAHTTLPGIATSYILFRQNKLWVIWLGAIFSSLLTLFLIEIIKKYSKIKLDAILSFVMISFFGLGNVLMSYILSNNEDSSIANLEKTILGQAALMNSNDHLIVKIITFLTIFTIIIFYKELKMFTFDSLFSQSIGFNNVFIIFIFNILLIGVIIISLKVTGIILTSALLILPGVISRQISDQLFNNIIIICFISFFVNLSGVIISILIKNIPTGPVITVITTFLVFLVFLFGPKQGIVKKYFQQMKYKKKIRKFRQLIHFYNTKKYYSIDKIDFFLFKKGYLYMECDKILMSQKGSELVENLINGKF	Candidatus Phytoplasma luffae	02010 ABC transporters	0	356	19	30	48	27	3	2	manganese/zinc/iron transport system permease protein
A0A975FIR6	MLKDRNEKYQILIECKNLSKFFFRKKLFAKSSIFLKANDDISLSIHKGQTLAVVGGSGSGKSTLGQTLLQLEKSTSGKVIYYKEQQSINLSELSTKDLSKYRKDLQIIFQNPYLSLNPKILISDIIGEGLLIHNLVKSKNDPLYKQKILDIMKKCGVKEELYNRSLAQLSGGERQRIAIARTLIIEPKFIVCDEIVSALDVTIQKQILELLKQLKKNYELTLLFITHDLGVAKYLSDQIAIMYLGKLVELGPTEKIFTNPQHPYTIELLNSIPKLIEYGISSKKYIAKYENSSYDFLYNKKKEDKDWHQVSPNHFILCTKKRGY	Candidatus Phytoplasma luffae	02024 Quorum sensing	0.413	324	15	42	45	27	4	1	oligopeptide transport system ATP-binding protein
A0A975FIW2	MRYIIKKIFYNFLIVFFIFLISFFILRKTTDPVTTIIGSKNLTSEKIEIHKKEFGLDGNIIEQFKRYSLSILKLDFGKSYEDLNESVFDIFIFHFCNTLKLSLWSCFFGSFLGIFLGILSKFYNSKKNIFFDIFSIVIISTPSFIIGFLLQYFLAYKLDLFNISYFGDFTDMFLPIATLSLVISTYIFKITQNTIEECLKQPYVKAAYAKGLSKKAVYFKHVFKNALAPILSYIGLMFSFLVSGTAVIEYIFNIRGVGHLIKESFNKQNLNLLQCTIICLSIFITFFNLFLEFILLYINPQLNKKK	Candidatus Phytoplasma luffae	02024 Quorum sensing	0.2749	306	17	28	39	24	5	1	peptide/nickel transport system permease protein
A0A975FJR9	MVNINNNQYDKKKMFKKFFIIIFLSFITTFIIQYFSTAKTVEDTTNKEPELEYCSYQIVFDKDKDQINKEEFEKKIVALRDYLISLDLNNSLTETDKQTLQEKLKEINIFEFGINKNNKSFFISNINEENLSQYKKYRKKGIIQYINEIIQKKESFFCIKGNVISKDKKENFIKDFFNIKTGTQYSYIEKKYTSNKVPPLEICSFSSDQDIKRLKIDEKEQIYGDVEGKSLIDLTKYNELIKNKLNNEKKNNLFYLKLTSIRDDKPFFKPIFVDDSGDLPINWYNKISWNFLFIWGYIWNVLIILIGSVLSFFSSIFSSGSGYFFGNFGLGITLTTILIRTLLWPIYTKSNFLSTSMNTMKPEIDKIKSKYVLKKDKESLQKMQMEIAKVYKKHNLSVF…	Candidatus Phytoplasma luffae	03060 Protein export	0.4593	561	49	76	53	46	3	7	YidC/Oxa1 family membrane protein insertase
B3R0N7	MFSDEYLKQLNSKQYQAVTSKDKAVYLVAGAGTGKTKTLTIRIAYLIKYLNINNEKILAITFTNKAASEMKERLVAMKVDIYKSTICTFHSLGNRILKKFIHVLNNNFDSNYSILDIKDSLKIIKKISKDLNIDKEKYKPKELNKYISNIKNKKEKKIFIDNYDNNILKIYNNYQQFLENNNLLDFDDLIIYTYKLLKKHENIKNYFQNKFTHILIDEFQDTDFLQYQILKLLNTKNNYIFAVGDPDQSIYSFRGAEITNNKLFLKDFKAKTLILDENYRSTNNILDKANLLIQNNSFYGFTKKLQSFFGKGHKVFPKMFENDDQEVDFVAEKIKNLIKKEKCNYEDIAILYRLNGLEKKFEKIFLKKNIPYIVFGNINFFNRKEIKDILAYIKILIDP…	Candidatus Phytoplasma mali	03420 Nucleotide excision repair	0.4548	708	78	112	71	32	4	0	ATP-dependent DNA helicase UvrD/PcrA [EC:5.6.2.4]
B3R0D8	MDILFENFNILPQTQKALKELNFLKPTAIQNLVISEMIEGYDIIGQAQTGTGKTFAFGIPIIEKIDLNIKQTQSLILCPTRELALQVFQEFKKLIKFYVEIKIAVIYGGESYIKQFKVLETKPHIIIATPGRVIDLLERKKIDFSGLKILTLDEADEMLNMGFQEALETILQKIPKKRQTVLFSATLPPTIQKIANKYQNNPKVLKVYQKNIAVSSVQQFYFLVKEFDKLKLLVRLLDLENPNSVIIFANTKKDVDEINAYLQENNFSVDFLHGDLKQNQRQQVMNNFRNQKIKILIATDVAARGIDISSITMVINYDLSRQNEIYVHRIGRTGRAGLKGLAYSFVAPSKLSQLKSLENYLKEKLIFKTIPKVKDIQEKKLKNFQEKIFEMIKNNPQED…	Candidatus Phytoplasma mali	03018 RNA degradation	0.2763	531	50	63	60	24	1	1	ATP-dependent RNA helicase DeaD [EC:3.6.4.13]
B3R0L6	MEKYNYIWEKILKEISKIYSDEVFNETFKNTKKVYKYENEIIFILAENEFIKNKIYKIYLSKINEISKSFFKENLNFKFITKKEIKEEKIDNTNYNIYNYGNLNKKYNFKNFIIGESNKFAFEMSKKISENKEIKINPLYIFGNVGLGKTHLLHSIGNKIIKNNKDKKVLYVKADEFIEDFINQLKEEKIENFKLKYRNIDVLLMDDIQIMSEAKRTQIEFFKLFDYLYLNNKQIVITSDKNTSELKNIMSRLISRFEAGLIIDIKKPDFKHRINILNQKMYEFEIKKIKINKEILELIASCFVNNIREMEGALLRLFNYIQTYSNEIDLNIAKEILKPLLKGKMNNFKNKSYKKEYLEKINIIISSFYNIEINELLGKKKHKKYTLPRHISMYLSKKL…	Candidatus Phytoplasma mali	02020 Two-component system	0.5717	455	49	81	36	26	2	1	chromosomal replication initiator protein
B3QZX1	MISLITALDPNFLIGNCNMLPWHYPQDLKFFKKMTNNKNVLMGYCTYKSLKKYYKNKNFLFQKTYVASFDQSLQLPDAIVINNLFNFLKNIQDEIIIIGGSQIYKQTLPYINILYVTHILTRFQGDSFFPFVNLKKYKIVSKKIYPELIFVEYHKIS	Candidatus Phytoplasma mali	00790 Folate biosynthesis	0.5404	157	14	18	17	8	2	1	dihydrofolate reductase [EC:1.5.1.3]
B3R097	MLDFLNKYFFKKKETQHKINFNHNKNDLYNFKKILNLNSKINDNLLKSLEILFIQTDISTETVIYLMTEIKKQIKEKNIIYSKNLSSIIFETMLKLYQKDDFLIYQNKVNFLSNEFFPKPEVYLFVGVNGVGKTTTIGKIAQQFKNKQKKVLLIAGDTFRSGAIEQLKIWGQRTQSTVFFKEQAKSPSNVIFEGLQLAKKENYDVVLCDTAGRLQNKLNLMSELSKIRRVILKVLNYEPQETFLVLDAMMGQNGIDQVSIFQKNVFINGVILTKLDGSSKGGLIFTIKHLYNIDIKYIGVGENVEDLIPFEIKNYILNFLKDFF	Candidatus Phytoplasma mali	03070 Bacterial secretion system	0.5177	324	29	40	37	16	1	1	fused signal recognition particle receptor
B3QZF7	MGLKLDLSGIKKFINFEKESQKLISKIKTIHQNMQNKRGVGKDFLGWLDLPFKVNSQEIIKINQIKSYYNLEVLIVIGAGGSYYGVKAGLDFLKFDFVSSNPQIIFAGYQISGFYLSNLIKYLKNKNWAINVISKSGNTIEPAIAFRILKQELEVKFGKKETKKRIFVTTSKNKGNLFKLALQEGYEVFDVPESVSGRFSVLSAVGFLPFIFANINIENILKGARDAFYDTSSCELSKNLSYQYAVSRFCLYQNKKHIELLVSYEPSLISFTDWWKQLFGESEGKNGKSLFPCGLYATSELHSLGQYLQEGPKIFFETILNVKNIPDDCLIPDVFNDIDKLNYLSNKSLSYVNQHALNAVKIAHIQGNVPNIEITFDYLDEYHFGYLVYFFEKACALSA…	Candidatus Phytoplasma mali	00030 Pentose phosphate pathway	0.5631	426	32	44	49	34	5	4	glucose-6-phosphate isomerase [EC:5.3.1.9]
B3R042	MKEANIIKNKNNKYEIFSLKSLFFLGLMFICVLNVYMFKQNTASYYQQLFTPLLLCMVLGIFLHFVGNMIPFLNKFGLSFLLCALVPSYLVYQKVISPKLVEKFHEDFFNKGINFPHFFILLVIAGSIFSIDNKLLKKSMKKFLPLTLISVTVAFLLVGGIGHLLHFSVPKGFISKGSFLDAIFYVFVPITNGGVNFGVNGLTNGLYGRVSSKINNFELRAFLIAPLILTRILAIVFTSLLCNYLNKTKLNGQGQLEYIKNKNKSDLTNKNKKLFELSDIRTGLLIAIAFYMLGRVLSFVFFKNNDFVLVFMIILLFIFKLFNLMPISFQGNLIQTGKFMTTNFAAPMLVGFSLTTNWKILLAALTASKIILLVLTSLLTVTLISLLLAKKFGFYALEA…	Candidatus Phytoplasma mali	02020 Two-component system	0.2797	457	31	36	77	32	4	1	malate:Na+ symporter
B3R0R6	MDFQKLKRFISSYKNIILTLICFIAISLIAIVIYIKNPNKNTTEQTNSSIPLLKKSDNNFIYSVPNGIGQLFPNKELGLYALYADSQEFLVQKPLISTFFEELVDEEAWNQLSSNDKSDMLHYNSHLIPRKFVFHLIESIKNSKDFNQYIGTNDGFKQSQNQTSKNFTFVLRPDAKFENGTPINAKTIQTTINKFISLFGDFKDMLGLKNIGTEKDSNYVKTFEDKPYEFQLKFSAPKSLFEVIKNINRIILIEETQYNASISPDGQIKYGTAAYPFISYGPYIINQGYNDKTWIFSKNNSYFDHHKNVLPYDEVQMLIEHNSGSSVQETELFQDNKLHLYVCDANKIDSKFLDNFKKDLFCKPAGYSLIMSFSSNPRVKDPNLRKALFYSIDRNKIKS…	Candidatus Phytoplasma mali	02024 Quorum sensing	0.4194	635	53	63	57	55	5	2	oligopeptide transport system substrate-binding protein
B3R011	MLKKIKLIFNSKLIFRFIFTLFIIFIFILGRSIQIPFLNVQIQTIIQLLKGLTTSDKFLINFDLNNFNLLSLSIYPYITISIFIQLVQKFIPHLKEWREQGEVGKQKLNRLTRFLAILLAMFQSYLMINKYSGNKESGGEIFIGEKLYISFFLATGTAIAIWLSDLITAKGVGNGTSILIMVGMSSGVITTFQKIFAFWNTDKIKFFALLFFLLFILISTIIVYLATLKIPIIYPNKKSQVENYIPLKINVPGVLPIILTSTMQAFFMFCINNIPFFNQLKCKDKIIEFISISTNLGIIFFVCLIIFFSFLTAFLIVNTNDIAEHLSKQDAYIENCRPGKQTVEKISYDFFRITIIGVFFMIFLFVLPLLISKGFDFKEFKIGGTGFLIIVGVSIETLQ…	Candidatus Phytoplasma mali	03060 Protein export	0.4246	414	22	32	49	26	4	3	preprotein translocase subunit SecY
B3R096	MDFLSNSFQKIINKIKGIKLIKEKHIEEIMEEIRLSLLQADVNYEVVEEFNSKVKSKALGQEVLKSLNPSQQVIKILNDTLVEVLNSKNIHLNFANNNEITTFMLIGLQGSGKTTTAGKLAILAHKKFQKKVLLIACDIYRPGAIEQLQDIGNRININVFFKKDVTVENIISEGLKYASLNQYDVVIIDTAGTLSINKAMIQELKMIKNLSNPSEIFLVVDVLFGKEITNVAKTFNEKLQVTGVILTKMDADVKGGAVLSVKATTNLPIKLMSSSEKINDLEFFDAKRMASRLLGMGDILTVIEKVTDNIDKKQGKKMIDRLLDDDYNYYDFQKQLKMLKKIGSIGSLLKLIPGLSSKFGNLNLQDFELNKFESIIKSMTKEEKFKTNLISLSSRRRMR…	Candidatus Phytoplasma mali	03060 Protein export	0.5399	456	37	59	55	30	1	0	signal recognition particle subunit SRP54 [EC:3.6.5.4]
B3QZU2	MFKKNFLDYFYLNLILLFIYIPILSLVIFSFNQTEGRIASLVNWERFGFRWYGKIFSNSAIRNSIIVTFKIAIFSTFISTIIGTLAAISLAQNKLKWQHFILNLNQISFVIPEIIIALALFVFFGFIRLENGFLRMLFAHISFSVPYVLATIFPKCNNFEINLFEAAYDLGANPLQTLIRVVLPQLKSVILAGASLAFALSFDDFIISYFVGGSDYQNISSYIYSLKGTINPAINALSSILILFIFFKIFINYLKLRKESIFK	Candidatus Phytoplasma mali	02010 ABC transporters	0.25	263	18	13	34	23	1	3	spermidine/putrescine transport system permease protein
B3QZG0	MPKQSSNFMQTIFLILFFIICFIFIRYIFVKPEPKENLLYVAAVFKNKDKMSEFSQELKKLHSLEPHLSKEYDIQKLFIDQQYLDVFKLYTNNQEQNIQIKKLTESQELLNNIKIEFEYKEDDKTASQSVFIIKIIDIQSKIQNIIKFDNEYNFNYFYFDLQKNFPPESKDFQKQQNKNANDVKDFFTVLMGTNYKYIVEEKYKKYFDISENKDFFLKFSNSNNNKKFESLLSQELFNNEKKEINSHDLSIYNQIIKQVVAGNNNPPHLIAKLKFNNDIYFDFPIFVNNSGYLPIQWPSKLDWSGKLGFYYIWNVLIISIGFFLYIFSYIFGNLGFGIILTTILVRTLSWPIYTKTSTFTLNMSLVQPEIDKIRDKYILKKDPVSIQKMQLETLRVYKK…	Candidatus Phytoplasma mali	02024 Quorum sensing	0.4558	572	50	63	56	36	1	5	YidC/Oxa1 family membrane protein insertase
A0A139JRH4	MKLEKKYEKIAILTSGGDAPGMNSVIRTVFLTSQKKNYKVYSIKDGFLGLYKNKIEEMTEKSFPSRILNISGTFLGTSRFIEFKTDKNIRQKCIQNLKQKNIETLIVVGGNGSYQGTLLLSRLGLKCIGIPATIDNDINYNDFTIGFSTAVNNITDAIDKIRDTSISHHRCTIIEVMGRITGDLALYGGIAKGVDIIITPQNIIPKKKILEKTKVLYNSQKRHLIIIITENILNIVNLAQEIEKYSGFETRVQVLGHIQRGGNPTAEDLFLSSQMGYYAVNLLSKGIYNVGVSFYKGDLCFFTLEKILEPKIIKNPLINLIKF	Candidatus Phytoplasma oryzae	00010 Glycolysis / Gluconeogenesis	0.5851	323	23	32	31	19	4	0	6-phosphofructokinase (EC 2.7.1.11) (Phosphofructokinase family protein)
WCA22452	MKKLTSNQIRQMWINFFIRKNHHKENSFSLIPKYDPTLLWINAGVAPLKKYLNGTEKPPFKRIVNIQKCLRTNDIEKIGNTSIHHTFFEMLGNFSIGDYFKKEAIDFAYELLISHEWFNIPKERLYITYFEHDKETYSFWLKKGIDKLNLISLRTNFWQIGEGPCGPCTEIFFDRGSKYDHRGKELIYEEITNNRFIEIWNIVFSQFNCEEHLKKDEYKPLPSKNIDTGAGLERLACIFQQTDTNFETDLFFPIIQKISFLSNCEYKGQKFFKIIADHIKSLVFCINDGAIFSNLGRGYILKRILRKAFQSGKKIGFSEPFLFKLVGSVIDIMNDFYPDLNKKKNLIEKMIKEEEKKFLFHLNNGEKIFDKIIKNNELSGENFFKLYDTFGLPQENILE…	Candidatus Phytoplasma oryzae	00970 Aminoacyl-tRNA biosynthesis	0.5651	897	85	113	86	43	12	9	alanyl-tRNA synthetase [EC:6.1.1.7]
WCA22549	MEKKEFLSKEEKIWFNIFNNLSLIYSKEVFEENFSYIKKPYKIEKGIFFILVENEFIKRKMYDIYLNKIEEISKKYTNEKFYFKFITCDDEIIKNDQNKKNNIIEQNELENNISFLNNDNLNVNYNFENFVEGNSNFFALKMAKKIAESEDILINPLYIFGSVGLGKTHLLHSIGNFISKKKTYKKILYIKADDFVEDFTNQLRKERMEYFKSKYRNIDVLLVDDIQMMSEAKRTQIEFFKIFDYLNFNKKQIVITSDKPITELSNIMERLTNRFKAGLIVDIKKPDSKHCFDILEKKIFALQGYKNKFKKDVLKFISFNFCDNIREMEGALLRILNYAQIYDLKVNLKNTIVSLEPLLKNKTLISGEKIYLDKIQKIISEFYNINIEDLQSKKRHNKY…	Candidatus Phytoplasma oryzae	02020 Two-component system	0.5393	465	49	69	42	25	3	1	chromosomal replication initiator protein
WCA22254	MISLIVALDSNFLIGNDNKLPWHYPEDILFFKKKTLKKDVLMGSKTYYSLRNYYKKKTLPFRKIYIANSEINVNLSQIIEQKTFLIKNLILFLKKCYENKKDIIIIGGSQIYKQSLPLVQKMFITHILKRYKGNKFFPFFNYNDFNIIKKKISNELIFVTYLRK	Candidatus Phytoplasma oryzae	00790 Folate biosynthesis	0.5404	164	14	26	19	9	1	1	dihydrofolate reductase [EC:1.5.1.3]
WCA22414	MPELPEVEITVQSLKKYLINKKIIELKVFSESIISSIELFQRICFKTFLDIQRKGKFLLFFLSDDLVLVGHLRMEGKFNISHSIKMSSVNDKHEHFRIMLENNLILRYYDFRKFGRFILFNKQDYLKKKPLNQLAPDPFDINVKNFYNSLKKSNISIKKNLLNQKVISGIGNIYANEILFITRIHPETRSSSLSFKQINSIIKEAKIILLDSIASGGSSISTFTVLGKKGSFQKKLLVYKKDNTKCCFCSEIIQRKKIDGRSSYFCIKCQKLSR	Candidatus Phytoplasma oryzae	03410 Base excision repair	0	274	17	36	30	29	6	0	formamidopyrimidine-DNA glycosylase [EC:3.2.2.23 4.2.99.18]
WCA22302	MNKIINFFFTKKKIIRKILVTLIVIFIYIIGTKIYVPTLTKEQYVLISFKDNFNKTLNNILNINILGENSRSLCLLSLGVIPYITASIIMQFAVKLIPFLKELGEQGEKGKKKIDLMTRFLTIILSIAQGISLILKTGIFYIKDNKQLTLKIIFFLIVGVFICIWLADLVTSKGIGNGISLLIVIGISKELFNTLKNLIYIDFRILSIYLKIFIVCLFLFLLIITVILCSAYLKIPIKYAYKRNIREIEQNIPLKINTAGVLPIILANTLISIIPTISIFFKEDSFFKKMEKVFFESRFNYLGIGFFIYLLLIVFFSFFSVFVTINPNDIAEHLSRKDAFLENVKPGKQTVYKLTHELLRVSILGTIFLTILSALPDLAGHLFNIQNYIKLGGTSFIII…	Candidatus Phytoplasma oryzae	03070 Bacterial secretion system	0.4286	424	25	40	58	23	4	1	preprotein translocase subunit SecY
WCA22250	MSFLNESLQKIIDKIKNTKYIKEKDIEIIMKEINLSFIKADVNYEVVNKFNKLIQKEALGTKILKGLNPQQQIIKIIKDILIEILGSKEINLNLSNNNILNIILLIGLQGSGKTTTAGKLSLFIEKKLNKKVLLIAADIYRFGAIEQLIQIGKKINISVFFKKNEKINKIIEDGLKYALNNKFDTVVIDTAGRLTIDNEMIGELNNIKTQTNPSEILIVSDAILGQSSVEVVKNFHEKIKATGVILTKMDADIKGGTALSIRYMTKLPIKFISSSEKYNDDNFEVFYPERIVSRILGMGDILTLIENVEEKINSKEEEKILKKILNTEYNYNDLKKQLKIIKKMGSLTKILNFIPGISSQIKNMPILETDFLKKYDAMINSMTNEEKIYPYLIESNNRR…	Candidatus Phytoplasma oryzae	03060 Protein export	0.5399	454	42	65	47	27	0	0	signal recognition particle subunit SRP54 [EC:3.6.5.4]
A0A0L0ML70	MERLVLVDGNSLVFRAYYATAYKKTILMQNYQGENINALIVFINMFKKILTSYTKDYICVVFDSPQKTKKHQIYEQYKQKRLVTTLSLTEQIDLIKQYDQRIDALNLLIQQKEEEINTKENLSEEQIKKLKEEILHFKNKLNLEFQIVSTQKTQLLEIRKQLQQSDLKLLDLKKEIQASHNLTEKQKQLYITEIAEKQTQIKMLSEQLYSQEKKVELAIGYTQAYTEFFKSTIETQNLIVDKLNKNLDIWMKIQNKQKQQLTTEDSRLAQQFMKNTKDFPGFKNVIGMKPIISQLKEVLDYLLHKDLYKSMGLKKTQKGILLYGPPGTGKTFLAQVFAKESGLPFFAIVPSNSMKEIEDEFKKARRNSPSVVFVDEAEEVLKSRTSEKLEEGDAKKTNL…	Candidatus Phytoplasma phoenicium	03050 Proteasome	0.3585	465	29	61	53	23	2	1	AAA+ ATPase
A0A2S8NV83	MTEYKFIDGTLLKNMFINGTLNLKKNYQNINNLNVFPVPDGDTGTNMQMTMMEGVNNLKKIQDSSLLTVAKVLNDSLLLGSKGNSGVILSQFFSGIYHQINIFQKKQINVEEFIQTLESGYHKAYKAVMKPVEGTILTVLRESIEEVKKHQPSCQTIKEVIENLVKYAKVSLIKTPMLLSVLKDANVVDSGGAGVIAIFEGMLLYLNKVQLNEDMIDNTSQIFLDINPHNHTLLTDIKYKYCTEFIMKLHEPLSFDIEMQKNKLELQGDSLILLKDKELLKIHFHTNKPGDILTYLLQYGDLVKAKIDDMKKQYEQHIAKIKSYPTNIPNYALITFASGIEMKNIFQDLQVDYIIDLNQKKSYQQFLKEILTQINARNIIILTHQDEIFSEIKNIVDNL…	Candidatus Phytoplasma phoenicium	00561 Glycerolipid metabolism	0.5235	545	48	57	65	29	4	0	DhaL domain-containing protein
A0A559KJJ7	MTIYKTIDGKLFKKMIINGALNLNKNSQAINDLNVFPVRDGDTGNNMKMTMLEGIKKLENIDDSSIIKVTQVLSDALLINSKGNSGVILSQFFCGIYEQIKIFQKNNINISDFIQSLARGYQKAYNAVIEPVEGTILTVFRESIESVRKEKDKWQSINEVVENLIKYAEISLKKTPDLLSVLKKANVVDSGGAGYILILNGMLSFLNDTEIQEYTDNNINNFFLNPQAKEYHYDLEISKLNYIYCTEFIIKLQSPDFFDVKLQKKYFMKQGDSLIFLKNNDLLKIHIHTNDPGIVLTSLLKYGTLIKCKIDDMKEQIDSVIEKKKKNNDFNINTQSKDYAVIAISFNKELQDIFKDLKVDYIIEYIPDNDYFLIQQLRKILTNINVKNILIFPNYKKTS…	Candidatus Phytoplasma pini	00561 Glycerolipid metabolism	0.5018	565	56	70	65	37	5	2	DhaL domain-containing protein
A0A851HAH5	MTDHKIIDGILFKKMVINGTINLKNNYQKINNLNVFPVPDGDTGTNMQMTMVEGIEKLKLVDDPSIVKTSKVLSDALLISSKGNSGVILSQFFSGIAEQINVFQTDTIDIPQFIDSFVNGYKKAYEAVMEPVEGTILTVLRESIEATHKKKSFKTLKDVLKYMIKHAKISLNKTTDLLPVLKKFNVVDSGGAGFVCILEGMLNVLENDELMLETDDAFNEGAHSFDNIEHVVEENLKYMYCTEYIVQLRPESGFNLENKRKELLEIGDSLILLENNNLVKIHIHTNMPGDVLTNLLQYGTLKRCKVDNMKEQNENVVKQKNADNSSQLSYSLISVVSNEEIKNIFADMNVNYIIDKSDKSNKTVSSKEFSKIFKQLKPSHVIVLTNGEENKLAAQKALK…	Candidatus Phytoplasma pruni	00051 Fructose and mannose metabolism	0.4754	565	54	58	64	37	3	0	DAK2 domain-containing protein
A0A0M1N119	MIDHKIIDGILFKKMVINGAINLKNNYQKINNLNVFPVPDGDTGTNMQMTMVEGIEKLKLVDDPSIVKMSKVLSDALLISSKGNSGVILSQFFSGISEQINVFQKDTIDISQFIDSFVNGYKKAYEAVMEPVEGTILTVLRESIQATHKKKSFKVLKDVLKYMIKHAKISLNKTTDLLPVLKKFNVVDSGGVGFVCILEGMLKILENDELMLETDDSFNEGAHFFDNIEHVVEENLKYMYCTEYIVQLRPESGFILETKRKELLEIGDSLILLKNNNLVKIHIHTNMPGDVLTNLLQYGTLKRCKVDNMKEQNENVVKQKNSDNASQLSYSLISVVSNKEIKNIFSDMNVNYIIDKSYKSNKIVSSEEFSKIFKQLKPSHVIVLTNGKENKLAAQKALK…	Candidatus Phytoplasma pruni	00561 Glycerolipid metabolism	0.4845	565	51	62	64	40	3	0	DhaL domain-containing protein
WAN63378	MKQKNNLDIISFKKNEKKKINILGFSVFSIIMILFLIIIHIFLSYDSENKKINSQNWHNFMSMLLFVMVFSGILKFIGSNFPIIKNIGGGPILCILVPAFIFNYNFGFPTFTKFQKTFINQTSFFSKNAEGIGFLDFFVTSLVVGSLVGIKKEFLGRMLKRFLPLVIITLIISALFAGIIGLILEPIKGLSNIKNSTRNSFLDSIFYIFFPIACGGFTCGIIPLTKIFSQGNIIYEDAFKDHILPSLLIAGIFSVILSGLIKKFFGKSKYSSPNKIIEKNIKILENDKNINQGMKNTELNINYSNISTGLISIFSFYILSSLLRIMILKLFSIFSFLKNIENYLPPVIVFLVILVIIVKILNLVSFYYEKCIEQASQFITNNFTSSILCLVGIGTNINK…	Candidatus Phytoplasma rubi	02020 Two-component system	0.413	495	38	36	55	47	8	1	malate:Na+ symporter
WAN63243	MRRVHVFKNLKLEQFETLKKIYEKFIFPSIQKDIYLIIKKSHIKITCYKNGTCLIQGNDVSDEIEYISKFLDLNFDKSLNNFSNSQISNNKDIISFNEEIDDINFKNIIGSDEVGTGDVFGPIIVCAALVTREQFFFLKKIGIRDSKKLSNDKIQKIMLMAKDKIAYSVQILTPLEYNILNQKYNLNHIKALLHNKVILDLLKKINKEEMVVLDQFASPKNYFNYLKNEKKVYKKIIFEIKAESKYLSVALASIIARNIFLKEMDKLSNNLIGMKLRLGSGYTVDKQIAEIYQKNKELIFFQKIAKCNFVNIKRYFK	Candidatus Phytoplasma rubi	03030 DNA replication	0.4566	317	28	46	31	19	4	0	ribonuclease HIII [EC:3.1.26.4]
WBL31426	MLEIILKLKQLDLIFFFIIILFVFYLIGSIPIGLLIGKIFIKKDLRLLGSKNIGASNAARVFGFKYGVLVFILDFAKGFFSIFLGPLIMIKILNLINFSSIIFNKDEFRIYFGLVTILGQMFSIFNGFKGGKAIATSVGVISFINPFVGLFGILSFIVLIIFFGYAFFASLISTLLVNFLLWIFFYFNFLPNYYIYLKEIFVICLITFLVFYKHLNNIINWIKGKENKFIFFTNKK	Candidatus Phytoplasma sacchari	00561 Glycerolipid metabolism	0.5135	236	15	19	33	12	1	2	acyl phosphate:glycerol-3-phosphate acyltransferase [EC:2.3.1.275]
WBL31479	MKIIFKYIFKYKIFFLLNIISVLFICCGEILITFLISKCLIDDINYMKENLTKIILILTILVILAFIGHFIVVFCSSKLSSLVFRDLSSEIFGKIQNFSITEIQNIGVSKLMNRTTNNIYQIMSFISTFYKSAIISPIILIISLFSIYFTSFKLAYSILITIPFFISMLFFLVKKNYKLSIKQQTESEKINNIIRENILGIKVIKSLNQEKYEEQKFEKINSKYSNLIIKFFLSMVSIEPLFYLLLNISIIITMGIGSIIIKETASLKIGSLYHCINLQYHVLFSILNFLLLFMMFPKTLVCVKNMEQLLNIKTENENNSFKIQKIDKIRKLEFKNIDFKYPDSEKKILENINFEVKNSELIAIVGATGSGKTTLINLIPGLIEPTNGSIKINEIDIKN…	Candidatus Phytoplasma sacchari	02010 ABC transporters	0.3444	575	42	68	65	47	7	0	ATP-binding cassette, subfamily B, multidrug efflux pump
WBL31636	MLFESIKRFKIEEAIKIIQKWFVKSKIKIFKHPILYDIYYVKKMIEKIPFILTKNQKKIVNEIYIDFKKKYITRRLIQGDVGTGKTIISFIAALGVISAKKQVLIMAPTEILAKQHYLNFSKLFPEIKTIFLTSKTKNKENFKKKIKEENIQIVFGTHLLSNIDFKELGLIIIDETHKFGIHVKKKTIYKNSTSDVLYLTATPIPKTFNTILFNFLDISILKENPYQKRNIITKIVSFEKIIPLIIQNQQKKEQSYLIVPSIKDNNKYFSIQKIKSLLEKNKIKNFYVLHSRIKTEEKEQIMNCFSNDKKGILLTTSIVEVGIDIKNATLIIILGAEYFGLSQLHQLRGRVGRNKKQNYCFFVSKNKNKRLKILEKENNCFKLSEIDLINRGPGDFLGH…	Candidatus Phytoplasma sacchari	03440 Homologous recombination	0.2768	435	31	71	37	23	3	1	ATP-dependent DNA helicase RecG [EC:5.6.2.4]
WBL31562	MIYNEKKEIKKTNNNTINFCGSLESGDCLVSIEQNEEKKINLSISSPFIRQFGPRIKKISLKILKEQNINSCNLIIQDQGAIDEVIKSRIITVLNRMRKNKQKNNQKMI	Candidatus Phytoplasma sacchari	02020 Two-component system	0	109	14	15	7	9	3	0	citrate lyase subunit gamma (acyl carrier protein)
WBL31536	MLKDNFLKRVYNILVYPNNSFFNQNNNSKPFMLLNSFTETIKITFLSTIISFSLGFFLSVILYLAKMERYKSINKFIIFIMNSLIFIINTLVNFLLSIPFVILVFLIIDYFLGDNFGIYHGFKAGLICLVSVLTAHSTRNIEQVFLQINPEIYKTAYTLGASKIQFIRYFLLKESISYLVLKFSSIYISSMAYSSVLAIIGVRGIAYIAYQYGFLATHNFTNFTNSDLIFVCSFIIFLWIQIIYFLNILIFNKLNKNKH	Candidatus Phytoplasma sacchari	02010 ABC transporters	0.2422	259	23	15	33	23	2	1	D-methionine transport system permease protein
WBL31351	MFINQFEVFQNKSEESIFRFFKFKKIIVNPKNKSWTFHVYLEAVLENIKNLNLFSKKLKKFINEKTNKFIRDLEVNVNFSFYNISIINRDLFQNILMEIINQKKENEIFYILYNSFFSIDIDKKICEFKIDPFIIKYLKDPNILNNLQSLLYKNYNLDLYICNNIQSYNLSSFFDDNNVWEKKINNILMEIINQKKENEIFYILYNSFFSIDIDKKICEFKIDPFIIKYLKDPNILNNLQSLLYKNYNLDLKLILKNNNNAEKNIINNEFEKTYYFSSQEESKAEGIIELSFKEIPFSKDEVKNFFLKYPKFKISGYIQKPEYIMTKNKSILFSFYLLDKVTKQDSIIYRKFFLNDDPNLKKIKKDFKDGLYLEIISFMDKYEKNQEFFFSFDFNKKNN…	Candidatus Phytoplasma sacchari	03030 DNA replication	0	1603	141	201	139	88	11	9	DNA polymerase III subunit alpha, Gram-positive type [EC:2.7.7.7]
WBL31270	MELHKKGMMIVISGPSGAGKGTIIKFLFKRTIHDFCYSVSMTDRLPREKEEDGKDYFFVTKEEFQKKIKENYFLEYNKFINNYYGTPRQKILEDLKKGKKIILELDIQGALEIKNSELCEKSIFIFITPPSKKHLYKRLTKRNTENNEILKKRLQKADEELDAAYKYDYIIINDEIKSAVDKIISIIVAENYKTKNIISYYIENILKEKNK	Candidatus Phytoplasma sacchari	00230 Purine metabolism	0.5248	211	13	34	16	10	2	0	guanylate kinase [EC:2.7.4.8]
WBL31220	MLFIGLLLLAFLLIITFIIPYFYKNNSSRIKSFKCFLKPSKDHWMGTDCLGHDLFEYIIKGTKMSLYISICTVLISSIIGCIIGILSGYFLGFFNILANLICDFIVVFPDFILAFLIVLLYGKSVCSLIFAISICYIPTFVKNMRAATMQIAQKDFVKSAICLGASNFYIIRKHIFPHILYTLIIRISLSLSSIILLAASFGFIGLGLDPSIPEWGSLLSINQSYINIYPRLIFFPMIIILLTNLSFNFIAEGLVNYLNYDQKNLD	Candidatus Phytoplasma sacchari	02024 Quorum sensing	0.3021	266	13	13	39	24	8	2	peptide/nickel transport system permease protein
WBL31383	MDSKTKTFQTIFENNLLTIEINKLAKQANSTVLVSYNDTVILSVSIMKEPQENNKLNYFPLMVIYQEKLYAAGKIPGSFSKREGKPSDKEVLNSRLIDRSLRPLFDKCFRNEVQIVNTVLSSNCDCNNEVLALLGSSLSLLISDIPFEDSVSGVCIGKINKQLIVNPNLEQKEKSEFLLILGGTKKSLNMIEAIAKEASEEDLLDAMKLGHEVIKKLCFFQDNIRKEINVEKKFFLITEKKQEIENEFIDKYRKQIKDFFYLNSSNFLTKKEINKKIKEIKNIILEEYINHDKEINNLIYLDKNKEKLFIMESILDNLFIDELRFIIIEDQKRIDKRGFDEIREIDIQIGLLPRTHGSAIFSRGETQSLAVVTLGNLNESKMIDDLSAEEEKRFMLHYN…	Candidatus Phytoplasma sacchari	03018 RNA degradation	0.5041	724	47	80	69	57	9	0	polyribonucleotide nucleotidyltransferase [EC:2.7.7.8]
WBL31579	MKRQKLVKEIKSRDTDFSKWYTDVCIKSELIEYSDLKGFFIYLPYGYAIWQNIQSFLDKKLKKSNHENVYFPLFFSNNLFKKEKEHIEGFSPESLIINKVGAKELKEKLVLRPTSEVLFSQYYAKKIKSYRDLPKLFFQWCSVVRWEKTNKPFLRSKEFLWQEGHTVHLSKKEALKENKYILNLYKKLGKKMLAMPFVSGKKTELEKFKGAEITFALEALMYDGQSLQAATSHFLGTKFSRKFKIQFQDNQLQTQFVQQTSWGISTRLIGAMIMTHGDDEGLVIPPFIAPIQIVIIPLDLKNHDILKKSKEIYKTLNKKYRVYLDEQKKNIGWKFSYYEMKGIPLRIEIGSNDLNKEELTFFIRHSFKKITISDKEILKETKKLLLEINNQMFKKSLYN…	Candidatus Phytoplasma sacchari	00970 Aminoacyl-tRNA biosynthesis	0.5768	475	21	76	47	30	3	7	prolyl-tRNA synthetase [EC:6.1.1.15]
WBL31418	MKKKIYFLLFFLIVSFLCIYLKYNNFFLNHKKVILFFNWGEYIDPVIIENYNKQSSRFVIKQSFFSSNELAINKIIAGNKYDIAILSEYAIEQLKDQYLEIIQPDKIKTPISQTKEFENLMQKYSIEQNNISIPYFWGKLGLLYNKNKINEKEIVQWRSLFQKNIYKIALYNNSFEGIFIGIKAINGDISGNNTEDIKKSKEWLLELKRTNSNLSFVTDQLLDYMRITNEERYDIAVTYSGDARFLMKQNSNLEYYDFSNEEGNNLNGSNVWVDSFVLPKGSDQEGAYDFINFLLKKENIEQNIFFTCYDSPYAQFWNKKVNSRLDLKMDKNDLFYKYNEEHKKQIHDSWNYVYSYPRPQDSYLFIFSFFILLFFLFTKINFFHQKIFSN	Candidatus Phytoplasma sacchari	02010 ABC transporters	0	390	41	39	36	29	2	7	spermidine/putrescine transport system substrate-binding protein
A0A421NY33	MRIGIFTDAYRPLISGVVVSVDSLRTVLQNLGHEVYIITTNSPHIKEEKDPYVIRFKGVPLPFKVFKNYRWILKYKSHLPKIKALNLDIIHIHTEFGLGLLGIYAKQQLNLPLVYTMHTMYVSFFQTNNSLFIKTFRPLMIRYADRIVKRCLINADFVIFPTQKALDFVDKRYQIEIKANKLHYEIVPTGLNLDHFYPQKHSFQDVDNLKNELNLKDYFVCLYVGRVSAEKEINYLIKAFALFNQHHQQSKFLIIGDGPDQQNLKKQVAKLKLTDKVIFLGFIHYDRLGLYYQLGDVFLNASLFETQGLTYIEALSAGLPVLVRYDVCLTGVIQDGQNGLFYHNQQELITKLIHLYNHPNYCQTLSRAALKSVAHFNQAIFGKTILKIFTHLINKNNFK…	Candidatus Phytoplasma solani	00552 Teichoic acid biosynthesis	0.4848	404	26	34	54	14	4	1	1,2-diacylglycerol 3-alpha-glucosyltransferase [EC:2.4.1.337]
CCP88383	MYFDSDALFFIALFFLFYLIGSIPVGLIIGKWVQKKDLRIVGSGNIGATNASRILGKKWGLLVFLCDFLKGFIPAVVCLKNEKIKNICSLLINKDIFISLLCIAAILGHMFSVFNGFKGGKAIASSVGVITAINPYIGLLGIVFFLIILRLSGYASLASIIATLLVNLLLWLLLLLKGNKDDNISILPLYLCIGLITFLVIAKHYPNIIRLWQGTENKFHFQNKKK	Candidatus Phytoplasma solani	00561 Glycerolipid metabolism	0.5953	226	13	19	39	13	5	4	acyl phosphate:glycerol-3-phosphate acyltransferase [EC:2.3.1.275]
A0A421NV19	MHKNEIIANIDGILFKNMIINGAINLQNNYHKIDNLNVFPVPDRDTGTNMKITMMSGVASIKDLQSNSIVEVSQVLSKALLMGAKGNSGVILSQFFAGMADNFIKLQKSSINLEEFIQSLQSGYQKAYRSIIKPTEGTILTVFRESVNKTIQQKDEFRSVVDVVESFLTNAQATLDQTTNLLPVLKKAGVVDSGGAGFVEILKGVLYFLKEDQMIEMQDLSLQTQAAAYHIHNLGQVNIKYIYCTEYVFKLKNIQNLDLDKLKSYLLTKGDSLVLAQDQEILKIHIHTNKPGAILEKLLENGDLQVSKIDNMKEQHQKIINENQVADDKTIVSQVMTSKKNQYSLIVFAQDAKIKKLLVDFKIDHIINPSYFVKEELLQLIAKIDALHIIILPNNLEIF…	Candidatus Phytoplasma solani	99980 Enzymes with EC numbers	0.6763	562	44	53	60	38	2	1	Dihydroxyacetone/glyceraldehyde kinase
CCP88019	MKLLINNKDKKISFIATLLIIGITVLILSIPICALFYRQFKPKSNDTKRIVVTTTMLQDLVNHLIGDVNESEQSKNYQKISNIEVKTLMGIGIDPHNYKTKLSDRAKIQEADLVVVNGLNLEAKMPDAFAEFSQKDCLWNAGDKLKEDINFKEELLKKDYSEDYDPHIWFSPDLWIQTLQNLKDVLIAKNIVKEKAKLETNFEIYNQDLTNLKTHIVKEMKDLKTNIEKQQNKFIIVTAHDAFSYWQQFCKKNHCSFDLEPIQGISTQTEASNNKIVTLAKKLAQHNVQAIFTENSMPKNSLKSLKEEVDKQRQKLKMTGTIKIPDNVELYSDSLGTNKHEEKFEDIFYKHSTYVGAFLNNIKIIKENLL	Candidatus Phytoplasma solani	02010 ABC transporters	0	370	30	48	38	20	4	4	manganese/zinc/iron transport system substrate-binding protein
CCP88189	MIKKRDLILEIKDIGKIFTNKFEGLKGISLQICKGESFGLVGESGSGKSTLGKIIAGILKSSKGQVFYFNNQKKYLIEQGYKKNIANNKDKSRFQEVQIIFQNCDASLNPKMIVYDLIAEGLIVQKKYSKQEIHAKIKEIIHLVGLKERDLSRFPHEFSGGQKQRIVIARALIVKPKIIIADEPVSALDVSIQAQIINLLNDLKNI	Candidatus Phytoplasma solani	02024 Quorum sensing	0.3982	206	11	28	19	14	2	0	oligopeptide transport system ATP-binding protein
Q3LBS0	QKDEFRSVVDVVESFLTNAQATLAQTTNLLPVLKKAGVVDSGGAGFVEILK	Candidatus Phytoplasma solani	99980 Enzymes with EC numbers	0.6999	51	2	4	6	3	0	0	PAM665 homologue
A0A421NYW9	MLKKVFETTDLKNPFQVEIGTYARNVDASVLVRFKDTVVLSATVFSDKKNNFDFLPLTVIYQEKFYAAGKIPGSFLRREGRSTDHEILASRLIDRSLRPLFPENFKQEIQVINTVLSSDPDFKSEIASILGSSLSLLISEIPFFEAVAGAYVARIQDQFILNPTFEQLNHSSLHLLVTGTKSNVVMIEAHANEVSEEIFLEAIEFGHQHIKILCLFQEQIQKEIGKTKKKVNHDSFDLTLETSFNEQYRTKIIEAILHLADQPKSNYLQLLKEQIFEQASKKNFFKTIEENTFIDLEAKKNYLQTIEILFQKLFKQEIRNLIIQDKKRPDKRGLEEIRNLESQIDLLPRTHGSALFTRGQTQSLAVVTLGSVSESKIIDGLNDEQNKRFMLHYNFPPFA…	Candidatus Phytoplasma solani	03018 RNA degradation	0.5063	708	29	56	69	47	3	0	polyribonucleotide nucleotidyltransferase [EC:2.7.7.8]
CCP88455	LEIRNNKELNIELNKKDQTAIEKLKKTSSDKALELEIPVVEGQKIPLFVNNAYSPVQWPKYLDWSFFGYLWNVLIISISSFLYIFSTFFTSSSGFFLGNLGLGVILTTIFIRTLTWPIYTKTSTFSMNINLIQPEIEKVKQKYALNKDPASAQKMQLEILKVYRKNNFSFWGFLLSFLQLPLFIAINQTLTRFIIPGGIFKTD	Candidatus Phytoplasma solani	02024 Quorum sensing	0.5839	203	14	18	26	16	0	5	YidC/Oxa1 family membrane protein insertase
A0A847N5J7	MLVSAKEMLLKAHKEGYAIAQININNLEWIKAVLQTVEELKSPVILGVSEGAAKYMGGFKNVMGMVRELDEFYQITVPVAVHLDHGTYQGAKNALEAGFTSIMFDGSSYPFLENLEKTKEIVALCHAKGVSVEAEVGAIGGEEDGVVGSGEIADPKESKELASTGIDMFAAGIGNIHGKYPANWKGLDFEVLAEIQKVTNNIPLVLHGGSGIPEDMIKKAISLGVSKINVNTECQLAFAAGVRKYIEEGKDLTGKGFDPRKLLAPGVEAIQEVVREKLTLFGSVGKA	Candidatus Phytoplasma sp	00051 Fructose and mannose metabolism	0.6944	287	12	25	25	14	2	2	Class II fructose-1,6-bisphosphate aldolase (EC 4.1.2.13)
A0A847N564	MSNKKISGDLFKKMVTNGAINLKNNHKEIDHLNVFPVPDGDTGTNMQMTMMAGVKEFNSTASESIVDVSKILSRGLLMGARGNSGVILSQFFRGVYSELSKIDNGSVDTKEFIQSLVGGYQMAYRAVMDPVEGTILTVVRESAERVLKEQANLKSIEDVLRVYLEQAKETLIKTPELLPVLKEAGVVDSGGAGFVKIIEGMLMALEGTMLTAEDIVTNIMQPQFDYEGAHALGDVDIKYGYCTEFIVELFNKDEFELDQVRIPLSQMGDSLVAVTDEELLKIHVHTNQPGVALTLGQKYGELKTIKIENMRSQHSSIMGIEHTNAKEPISKYAIIAVASGEGIQNTLKELGVNHIIDGGQTMNPSTEDFVKAVKSLNAENVIILPNNSNIILAAEQTLD…	Candidatus Phytoplasma sp	00051 Fructose and mannose metabolism	0.4243	548	30	38	42	37	3	0	DAK2 domain-containing protein
A0A847N629	MNLNDFVEETILSIRNLVKDHKVILGLSGGVDSSVLAALLSKSIGKNLTCILVDHGFLRKGEVNEVKTFFTEHFDLNLVIVDAQERFLNALKGIKDPEEKRKIIGSEFIKVFEEEKNKIQGVQYLAQGTIYADIIESGIKGSSVIKSHHNVGGLPSYMNLQLIEPLKYMFKNEVRKIGEILSLPNELIHRQPFPGPGLAIRILGEITKEKLDLLKESDYIFRDEIKKAGLESKIWQYFTVLTPLKTVGIKDGKRTYDDVLVIRAVNSIDGMSAQIYPFEFTLLNKIVSRMTTELNGISRIVYDITPKPTGTIEWE	Candidatus Phytoplasma sp	00230 Purine metabolism	0	315	15	29	35	19	1	2	GMP synthase (glutamine-hydrolyzing) (EC 6.3.5.2)
A0A847N5I4	MTGLRTGLFKEVEELKKEVSMMADLVLKQINSALLAFKENDVEKAKIIMSQDNLVDKMEEDIAKSALRIIWKEQPLAQDLRLV	Candidatus Phytoplasma sp	00520 Amino sugar and nucleotide sugar metabolism	0	83	3	10	12	4	0	1	PhoU domain-containing protein
USQ93562	MKILFIGDICGTPGVDYLIEKINFLKSKYKYNIIIVNAENVDNGKGLDYENYKELIIAGVDIITMGNHTFDNNSIKNFISSSNIVIPVNLDSECTASNGYKIIKYKNKKILIMNALGRVFINNNNLSCPFEKIENILNICHKKYNYSFLDFHAQVTSEKIALAHYFDGKIDAIVGTHTHVQTNDDKILPKKTLYISDVGMTGPYEGVIGQDKNIIINNFINTKHKKKHKIAEGKRQLNGVLLTLGPHKKITKINFNE	Candidatus Phytoplasma vitis	00230 Purine metabolism	0	257	30	31	18	11	4	0	2',3'-cyclic-nucleotide 2'-phosphodiesterase [EC:3.1.4.16]
USQ93514	MEKQKWLNNLNEKQIKAINSDKKAIYLHAGAGTGKTTTLTNKIVNLINDLNIDGDNILAITFTNNAAKEMRKRLKEFIPFYDFSRLTICTFHSFGYSFLKQNITYLNSNLTSSFFIIDEKESKKIIKEKIDILKLDKEKYKAKYFIKKISYIKNNKIKKKIFEELKIPKQINIRFNSSEEEKIFNLYEEYLKQNNFLDFDDLIIYTYKILKNNTSLTSFYQNKFSHILIDEFQDIDLIQYQIIKMISKNNFIFAVGDPNQNIYSFRGSDSFCNELFIEDFKGNVFYLDQNYRSSQKILDKANLLIKYNYDEKQNHFKNNLKSNITNGEIIYRNFHNDKKEAEFIAKKIKKLVQNSKYNYKDIAILYRINKLCKEIENNLIIQHIPYVIKNSISFYQKKE…	Candidatus Phytoplasma vitis	03420 Nucleotide excision repair	0.457	733	81	113	64	42	6	1	ATP-dependent DNA helicase UvrD/PcrA [EC:5.6.2.4]
USQ93479	MFQGSNFIKSIITEDLKNKKYTKVITRFPPEPNGFLHLGHARSIIINFELAKFFNGKTYLRYDDTNPTVEKQEYVDFILKDVKWLGYTPDKILFASDYFEEMYKRAVILIKKNLAFVDDLSAEELKKYRGDLFTPGINSPYRNRCIEENLELFEKMKNGFFKEENKVLRAKIDMASPNMNLRDPVLYKILDAYTLKNKHYFIFPSYDFAHPLEDAIEGISHSLCSLEFEDHRPLYDWVIKETEMEHVPTQIEFGRMNITQTILSKRSLKFLVSSGLVQGWDDPRMPTLRGMRNKGYTPESIKKFILEIGLSKNNTYVNQDMLYSFLREDLQKKAKKIMVVDEPLKVTIINYPENKIESSDVPYHKDLDLGIRKVFFSKHIYIEKSDFQIEKLDPKSKKL…	Candidatus Phytoplasma vitis	00970 Aminoacyl-tRNA biosynthesis	0.3594	539	39	64	48	28	2	4	glutaminyl-tRNA synthetase [EC:6.1.1.18]
USQ93201	MSILPVNKKFYIATSIVYASSIPHIGNVYEMILADAIARFKKLEGYNVYFQTGSDEHGQKIQKKALQQGLDTQKYVDQISDKIKEIYNKMNIKYDFFIRTSESFHKKQVQIIMKQLLKNDDIYLGLYEGWYSVYEESYISEKDLINGKTANGETPVWTQEEVYFFKLNKYQDRLLKYLNDELHLILPPYIKKEILNLLKEPLPDLSISRTSFEWGISLDFNPKHVVYVWIDALSNYITGLDYPFGEDDKKNKLKYFWPCDLHIIGKDITRFHLIHFPILLMALDLPLPKKFLIHSWILFNNKKMSKSLNNTLYVDDLLKIFSVDAIRYFVLHEIPYHSDGILTYDLLFERYNTDLVNTIGNLLSRTLGMIVKYNNGELRKKLNKVKEFESIDLAKESLT…	Candidatus Phytoplasma vitis	00450 Selenocompound metabolism	0.5875	521	32	55	70	32	3	7	methionyl-tRNA synthetase [EC:6.1.1.10]
USQ93155	MLSRIPNKKENKFYKFLYLPYFIILILFILIPIFIIFLYSIQESNKNSLFNISFTLKYYKDFYTTKVFIYVLFRSILIAIISTFFILLITYPLAYIVSKYITPIQSILILFINGTIWINMILKIQSLMQIFFLIRKILGINLLETNSAMLIGYVYLFLPYMFLPIFLSISKIDHNLINSAKDLGANEVQIFKKIIFPLSLPGLTTGVILVSLQIATNLVVPKYLGPTTITVISELIENKIFLIGDIKSACAIAINLTFLMLYILTFYKQNQFEKKNKSNV	Candidatus Phytoplasma vitis	02010 ABC transporters	0.265	280	18	22	42	19	1	1	spermidine/putrescine transport system permease protein
A0A660HN58	MLRIENLYKTYSMNKKNISILKKINLNIFEGQIFGLVGKTGSGKTTLLKIMNGLEQPDKRKETKIFKNFTYRESGTIWQNFNLLSNLNVFDNIALPLKIRNYPKEEIKTKVLEIIKFAGLSDCIELYPKQISGGQKQRTAIARTLVYNPKIIFCDEPTSSLDETVNKSILKLFYKINKIKKTTIVIISHDSSVIQTLCNSVAILNKNQIEQIIDLKPSYYFKSLSYKEIFLKK	Candidatus Phytoplasma ziziphi	02010 ABC transporters	0.3333	233	19	32	25	17	3	1	D-methionine transport system ATP-binding protein
A0A660HLY0	MKKMDLRDYYQKHKKILIISFILIISFIMILFAKKIFDYTQKDTNKNKTKNEEVINERNSSNFIYSVPNEIGQLFPNLDMGSYSCYTDTQEFLSSNCLRSPFFKEIVDENELNNYNEEQKKEIIHQKPYELPRKLKFGLVEQIEKPNDFTECIGTHGGWNKSFHKKDKKFIFKLRENAKFENQIPINSNTIKYTFDTYNSKFGDFKEIIGFEELKIFPNENYKFELILQNNKSLYEVIKFLNYIVLLEKNSFERSCVNEGNREEIKYGTSLDHPLVSYGPFKVKTGYNDSKWIFERNPEHFEPFNSHSDYETIKILIEHNSGNAIREKELFEKGELSLYVVEHGAELDDNFFNKFQKDLFCAPEEYSLTINLEGERVKNINLKKALFYGIDKKSITNVF…	Candidatus Phytoplasma ziziphi	02024 Quorum sensing	0.4084	624	64	72	51	39	8	2	oligopeptide transport system substrate-binding protein
A0A660HMB5	MKNQKIKIVYDGLEKGNIFEFVQKLSEFKLEKIQDFKNENENIFLITKTVKYGEIPDTTENFLKKYTHLIIGIAVSGNKNFGNNFAKAGDLISEKFNIPLVLKFENKGFNEDIEYIRKWLNNFINIKNNNKRIPSYITLNNQIIDGEGKIKDLNKDQEALKSYFKDEINPKLKKFQTLNEKLDFLIKNKYYEEDFLKLYTREAIKQIYQLAYSFNFKFNSFIGAFKFYNDYSLKTRDKKFYLESYEDRLVTNALYHASGNFQLAQELIKNLMKQNFTPATPTLLNTGLKKRGEFVSCFLLEAGDSLNDIARIVEFAMQLSKIGGGVSISLSNLRAKGETIKEMKNTCKGVIGVAKLLDHSFRYADQMGQRLGAGAVYLNVFHSDIEDFLNSKKLNADED…	Candidatus Phytoplasma ziziphi	00230 Purine metabolism	0	826	69	90	79	54	9	3	ribonucleoside-diphosphate reductase alpha chain [EC:1.17.4.1]
A0A660HMV6	MRKGIVIEFLIKEYLLIDLETKQQINAQVRGKIKYYNFKKETNNDLEYSKIKIGDLVLYETKDNQFFIDSILPRSNSLNRPNISNITQVFLVFSLVKPKFHFKLLDKFLLILKKFKLKIILIFTKIDLISEPELILFRDKISYYKKFFPIYYIDSKNRFGLDPLYNLFTNEITILAGQTGVGKSTLINALTSLNLKTQEISEYLNRGKHTTKNSKLFFFHEGYIADTPGFSKLDLLDFKIEEVKNFYDDFLIFADQCFFNYSCLHINEKKCKIKEAYQEGLISSIRYHNYLSFIKEISEKKKNKN	Candidatus Phytoplasma ziziphi	00730 Thiamine metabolism	0.5578	305	22	40	38	19	3	0	ribosome biogenesis GTPase / thiamine phosphate phosphatase [EC:3.6.1.- 3.1.3.100]
A0A660HLP5	MKKFSSESVTKGHPDKIADQISDALLDSFLKEDPESKVAIETVVTKQIVIVLGEIKTLFKFDSEYIENVIKNVVKEIGYNKESENFCYQKISILNFIHEQSRELTKIVKNKGAGDQGLMFGYATKETDLFLPLNFLLARNLSLRLTEVREKQILPFLRPDGKTQITLVYDENNNPLYIDSIVVSTQHEENIEQEFLKKNILKYVIEPIINPVLINEKTNFFINPSKSFVIGGPAADTGLTGRKIIQDAYGGEVRHGGGCFSGKDASKVDRSGAYMARYLAKNIVAAGLCDKCEIQLSYIISFDKPVSLFINTFGTNKVPENLILETIEQNFDLTPQGIIKILNLKKPLFQITSREGHFGHNDNLFSWEKIDQVPLFSKLLKEQN	Candidatus Phytoplasma ziziphi	00270 Cysteine and methionine metabolism	0	384	26	37	38	24	4	1	S-adenosylmethionine synthetase [EC:2.5.1.6]
A0A660HLQ7	MFQNTNDYKKYIYYFLRSVVFVINLILNIFCLFLFVVSICRIYWGPEKILDIFRIDYYKVASGSMEPLIKKEDIVVVKKIPDKEKENIVIGDIVIFQNKNMTDGIPIIHRVVSNNTKLKTIETKGDNNQKKDSSSTKYDGILAKHIFTISYFKTFLCFFFLILFIFSNMPFLLKNLFLSSKKKNNLYK	Candidatus Phytoplasma ziziphi	03060 Protein export	0.3029	188	15	24	17	12	3	1	signal peptidase I [EC:3.4.21.89]
A0A660HMD3	MTRSIKKGPFCDESLLLKVMKQNKNKTEKPIKTRSRRSVILPIFVGHKIDVYNGKEYISCSITEDMVNHKLGEFSRTRTFRGHAKGDKKVSKK	Candidatus Phytoplasma ziziphi	03010 Ribosome	0	93	4	16	5	8	2	0	small subunit ribosomal protein S19
A0A660HM06	MNNIPNKKMKLFQNFFIVLILSLILLFVIRSFGPKQIDYKKLKNQDIQIIFNKDIFESIKDYEFEKNIKSKIDLEFAFEKKYISIFVFGFDPKSKNIILEKLEKIPSDSDPSAKEIIVKIEQQIQDKIKDENNVFYFEEKLSSKEETSQIQDFFTIKTGTNLEYFNKKYEDLSNSKLKIGKLNIKQYNDLQIIKSKFLGIFDKDKKFLTQNNESYYNEIIKTKINKNNKNEINYFNLKYDETDKNEQYTKILVDDKGTLPIQWPNKIEWYFFLGWGYIWNVLVVFIGYFLHLFSFMCIGEGWFFGNLGLGIVLTTLLIRTLSWPIYTKSSTFSMNMSLAQPEINKIQEKYALKKDRESMQKMQMEIFKAYQKHNFSIFSIFISFLQMPILIAMFRTLNR…	Candidatus Phytoplasma ziziphi	03070 Bacterial secretion system	0.4156	538	51	70	48	34	2	7	YidC/Oxa1 family membrane protein insertase
A0A975FIJ8	MSKQKIKSIDGNLFKKMIINGTFNLKKNYQQINNLNVFPVPDGDTGTNMQMTMMEGVRELQAVENSSILEISRILSKALLIGSKGNSGVILSQFFNGIYESINRLQKTVIDLEEFIEALVNGFKNSYKAVMEPVEGTILTVMRESIENTKNNSKELKTIKELIENIIQNAKTALNKTPDLLPILKKSKVVDSGGTGFVFILEGMLLYLNDVELKDPDDNSIFSHNHSQSNHINDDSNLKYLYCTEFIIKLNEPDSFDVELNKAKIQNYGDSLILFKNNDLLKIHIHTNDSDKVLKELLVYGTLIKSKIDDMKKQKENFMSLKDIKTYSKLNKYFIITFGSGEEIQNIFKDLKANLIIDSHKKNFSAEKLEKIINKNNAENIIILPNDSNILEQLKIFFK…	Loofah witches'-broom phytoplasma	99980 Enzymes with EC numbers	0.5882	548	63	72	59	39	1	0	Dihydroxyacetone/glyceraldehyde kinase
AOF54559	MKIGFFTDTYLPIIGGIPISVKSHKDSLEKLGHKVYIITPQGPKNYEEKDASIIRIKGIPIPFKGIEGHRVVLRFKKYLSLVKDLNLDIIHIHTEFPMGKLGIYASQKLNIPSVYTMNTMHEYFFNKSKNIGIKIFKLFFILANRKALKKFISKTHSTIVPTHKILTLLEKDYNIKGKYNVVPTGINLEQFYSQNHSLEEIQALKVKFNLVNDFVCLYVGRLSPEKDISYLISAFASFCQNHPQSKFVIVGDGPEKKDLQKQVKQLQIENNVLFLGFVPYDNLGIYYQLGNCFLSASLFETQGLTFVEAMASSLVLLARHDQALDGLIDNGNNGFFYHQKEELINYLSLLYNDNKKTKTMSMNAKNSILNYDQTSFASKMIQIYKEAIKTNKENNNHN	Maize bushy stunt phytoplasma	00552 Teichoic acid biosynthesis	0.4848	398	32	43	42	26	3	0	1,2-diacylglycerol 3-alpha-glucosyltransferase [EC:2.4.1.337]
Q52MZ1	MTIKNKSNKNLTNLILIIIMSIIFFLGTYGWIHHQTLMAIEKKLITNHKRFENQNKNLQEIKNQLQQNKDAIQNQIA	Maize bushy stunt phytoplasma	01002 Peptidases and inhibitors	0	77	11	9	8	2	0	1	ATP-dependent Zn protease
A0A4P8GM10	HPFGWDSFGLPAEQYALQTGKTPRTFTYENINNFKKQIQSIGKSVDWDRELATSDPYFYAWTQWIFKKLYEKGLAVLKNTEVNFCPNLGTVLANEEVISNEKGMFSERGNHPVVKKKMKQWVLKITQYADRLLDDLNLVNWPLNVKEMQANWIGKNQGAIVSFPVSDQKITLKTFTTRPDTLFGVTFLVIAPEHELALQLTKPEYQQAVNNYLELTKQKKDLERDINKDKTGVFTGSFAISPCNNTKIPIWIADYVLPHYGTGALMSVPFHDQRDFEFAQKHGLKMIQVITPPSSDLENPTANQPNPPLTEAYTGEGIHINSDFLNGLNNERAKTKMLQFLEKNNHGYSHYTYKLRDWVFSRQRYWA	Maize bushy stunt phytoplasma	00970 Aminoacyl-tRNA biosynthesis	0.2548	367	28	31	33	16	2	10	leucine--tRNA ligase (EC 6.1.1.4)
E3SFX1	MISIKTPHEIAIMKQAGKIINEAHRLLASFVIPGMSTFDLDLLAKNFYQKKSVISAFKGYNGFPKHICASVNEVVVHGIPSKKTILKQGDIITLDLGINYQGYYVDCAYSYAVGTVCQTTHNLLALTQKALFQGLLQIKPQDHFSDISHEIELFAKNNNLGIVEEFTGHGIGTSLHEEPYILN	Maize bushy stunt phytoplasma	01002 Peptidases and inhibitors	0.541	183	10	14	18	11	3	0	Methionine aminopeptidase (EC 3.4.11.18)
A0MBX4	FAKGLISGCKKNHKVKSCKIQLKEDKSEIILYKQFLVADEATMSTINLKESTPITLEEAQQIKPHAKIGQVIDIKVDPKDFNLYAVKELKNQFNEELTKKKRENIYNFFEQQEGKLISAKIISENDKFYNLELEKEITTLLPKKEIASNNEMQVGERIQVFLSEVRKTTKWPKIFVSCNHVGLVVKVLEENIPEIQEGIVKIAGIARISGERTKIGLLSCDAQVDAIGSCIGERSNRIKNIIKILKDEKVDLFVWSDDPQELISNALKPASCIQVVIKDDINKYALAIVPDDQFSLAIGKLGKNVKLAVEVTKWNIDIK	Maize bushy stunt phytoplasma	03021 Transcription machinery	0	319	19	43	27	18	6	3	NusA
E3SFW9	MKRQLKLVLGNRKLMFQIFFTLFIISIVCLGTSWPLPFINTKSLDLSKLFGVFSINAGTLFGLGITPYITASIVVQFLQKLLPICREWKDQGQMGKRKLNLLTRSLALLLAFGQSFAFLNSYSKLFVTSISTSQLFLLALIATAGVAILIWFADLINSKGIGNGTSILIVVSMSHSLINLFVNLNESYLSQKNFLTLKTFNFACIVLLLLLFLIFTVVVQITSLKIPIDYARNQVQGKSYIPLKINSAGVMPVILASALLQPFQMLSGVIGNTKFTEVVDFFAKTNFPENQINFFAIGFLVLLVIVFSFLSAFMNVNPEDISEHLSKQDAYIAGLRPGEQTTRYLANTLFKITVLGTVFIAALVVTPILMEHFLGLKDMKLGGTSLLIIVSVALETIQR…	Maize bushy stunt phytoplasma	03060 Protein export	0.4246	413	22	26	67	31	3	3	Protein translocase subunit SecY
AOF54562	MINKVILVGRITKDPELKNTNSGTYVVKFTLAVNRIVSASSEKKTDFINCTVFGKQAENLEKYISKGALIGVEGNIRVETWEKDGVTNWQTSVVCNNVQFLESKKNPDNAYDNF	Maize bushy stunt phytoplasma	03030 DNA replication	0.3981	114	13	12	6	7	2	2	single-strand DNA-binding protein
Q5J6A2	GHRKITDLYQKTFNEIITKKKIYNIMKENGICCRLKIKKHKYQYKNNLKPNLQVVDNLINQDFITTSPTQKLFTDITYFKTPQGFLYFSCIIDSFNNQIVAFHTSKHQNKELVLNTIKKLPKLKKTMYHSFRP	Maize bushy stunt phytoplasma	99976 Replication and repair	0.2706	133	12	21	11	5	3	0	Transposase
AOF54949	MYFKHDYAYLEYIYDASLEKEILKRLSYVSGISSFVVVSQASRQLDDIVQKACLLLQEKITKNTSFKIETTRKDKSFALKSLELTQQIAPLILKQFEGKLIVDVKNPQVILHVSIRKEKTYLYLKSDETQALGGFPVSSVSRGTVLMSGGIDSPVAAYLAMKKGITVELLHFESSPLTPLESIQKVIDLAKVLSRYAFGNQIKLHLVPFRYLQETITKTVLDSYIINVMRRMMYRLASQFAFQKNHLCLINGESVGQVASQTLESMQTTTQVTSMTILRPLVTMDKNEIIKIAKQIDTFDISIRAFHDCCTLYLPQNPTTKPTILKAKREEQKIDYFPLLNDAFQNTITLNIDQHLQFNICDYGFFDVKESIKHFCEQNPEQTIVSQY	Maize bushy stunt phytoplasma	00730 Thiamine metabolism	0.3103	388	13	32	43	30	6	0	tRNA uracil 4-sulfurtransferase [EC:2.8.1.4]
Q52MZ0	NVELTGGNNEDKILLPIPVPNLNPAKYNHLITIEHKVTLNHNGMDIQTPLYLKVSTKYDTQQTLANPEKYFNVGLKTDNNDYDDIKRPQIKLNDRGIGLINIQISIEQKEIINTPNPKLNFICNYELVDYQGKVLDRGSQTIQNKISNIITI	Maize bushy stunt phytoplasma	no KO	0	152	20	13	15	4	1	0	Uncharacterized protein pam562
Q6YR19	MNKKEKEIIKIILRAYDHHLIDQSAKKIIDILTKTGANIEGPIPLPTRKEVFTVLRSPFVNKDSREQFERRTHKRLIQIINPNKKTIESLMHISLPPAIDILLKKNQ	Onion yellows phytoplasma (strain OY-M)	03010 Ribosome	0	107	6	14	10	5	0	0	30S ribosomal protein S10
P62439	MAKKVVKTVKLQIPAGKANPAPPVGPALGQAQVNIPSFCSQFNETTKDQMGFVIPVIISVYEDRTFTFVTKTPPASDLLKKAAKIESGSANASQTKVATITHKQVEEIANLKLPDLNAYCVEKACKIIEGTARNMGILVKD	Onion yellows phytoplasma (strain OY-M)	03010 Ribosome	0	141	7	16	8	7	3	0	50S ribosomal protein L11
Q6YQZ4	MPFSKLGRNKSQRRALLRTLMTDLIVQEKIMITESKAKELQKLADKMVTLSKKNTLHTRRQAKRHLFDEKINDDTTVLQKLFKDISSKYLDRQGGYTRVIKTVPRRGDGAPMAIIAFV	Onion yellows phytoplasma (strain OY-M)	03010 Ribosome	0	118	3	15	13	6	0	0	50S ribosomal protein L17
Q6YR06	MITKQSSNVLRKKRHLRLRKIVSGTSQRPRLNVFRSNKFLYVQIIDDTQQTTLCSANSKESNVLGSNIKAAEAVGALIAKKALAQGIKNVVFDRSGYLYHGKIKALADACRKSGLQF	Onion yellows phytoplasma (strain OY-M)	03010 Ribosome	0.375	117	7	13	12	11	2	0	50S ribosomal protein L18
Q6YPI8	MVFEKIKALIATQLSLDASTITLDTRFKEDLGLDSLDALELVMEVEKTFQINISDATLQNFKTVQDIVFYITKNTP	Onion yellows phytoplasma (strain OY-M)	00061 Fatty acid biosynthesis	0	76	3	6	10	4	0	0	Acyl carrier protein (ACP)
Q6YR01	MILILLGPPGIGKGTQASVLSDILKINHIATGDIFRKNFKENTELGILIKKIIAQGLLVPDDITNQMIADYLSKDIATKDFLLDGFPRNVLQARFLDDFFKNSHLFLTKVIYFNAGTQDLMKRIVGRRICPECGKVYHIENIPPKTPGICDKDQKTLIQREDDKPETFLKRLKVFNQETLPLVQYYREQNQLFEVDGMQNIDQVTKMILEVLETDRK	Onion yellows phytoplasma (strain OY-M)	00230 Purine metabolism	0.493	217	11	20	25	4	3	0	Adenylate kinase (AK) (EC 2.7.4.3) (ATP-AMP transphosphorylase) (ATP:AMP phosphotransferase) (Adenylate monophosphate kinase)
Q6YQY4	MHMKSFKIAIDGPAGSGKSTISKKLSQKLGWNHVDTGAMFRALTLYLLENEVSWHHEKSLNQALDKINLSYSCNKIFLNQEDVSLKIKSLDVEKHVSSVALIPAVRTKLLKLQKEICGNTPNLIMDGRDIGTVVMPDANLKIFLTANITKRALRKQQEDAQKGKITDIAQIMKQLKERDHKDYHRQLAPLSKALDAILLDTTELSIDEVIAKIIALIDKKRRT	Onion yellows phytoplasma (strain OY-M)	00240 Pyrimidine metabolism	0.5	223	10	27	28	15	2	2	Cytidylate kinase (CK) (EC 2.7.4.25) (Cytidine monophosphate kinase) (CMP kinase)
Q6YPR0	MNKDKVIQFIDGQLFKNMITNGAINLQNNYQTIDNLNVFPVPDRDTGTNMKITMMSGVKEISNLETRSIVEVSQVLSKALLMGAKGNSGVILSQFFAGMAQTYQKLNKETININDFIHSLEGGYQKAYQAIIEPQEGTILTVFREAVKQTLKAKSQFSTIEDVLSNFLQNAQKTLSQTTELLEVLKQAGVVDSGGAGFVEILKGMLLFLQDQKLLQVNQNTQTHTNPDKIQTLGQVNIKYTYCTEYIFQIKASQEKNLDMKQLKQALLQIGDSLVLVKDQEILKIHIHTNKPGQVLEKLLTYGTLKVSKIDNMKEQHQSILDQKHDTFTLQQEPTPDPKSPSNLPNSNKDQKYFFIAFVNDTKSQKVFADLKVNHIIKQSTFNPTTFEKLLQTNTSQNI…	Onion yellows phytoplasma (strain OY-M)	00561 Glycerolipid metabolism	0.5704	571	44	58	67	31	2	1	DhaL domain-containing protein
P60792	MNIEQLKERQKRIRNFSIIAHIDHGKSTLADRILEFTGTIDKRIMKEQILDSMDLERERGITIKLNAVEINYKSKDGKNYIMHLIDTPGHVDFSYEVSRSLAACEGAILIIDAAQGIQAQTLANVYLAVDNNLTLIPVLNKVDLPSADVPKVKEEIKETLGLDPEQALIASGKTGLGVIDILEQIVTRISPPQGDIQKPLQALIFDSYFDSYKGVVPSIRIVNGTVKKGDQIRFMASNSVYEVVEVGVYNPKQIVKDFLAPGDVGYLTAAIKSINHVRVGDTITSQTNQALLPLPGYKQMNSVVFCGLYPVETNKYDILKEALEKLKLNDSSLIFEPESSNALGLGFRTGFLGLLHMEIIQERISREFGVEVIATAPSVIYHVYSIKGEKLLVDNPSKL…	Onion yellows phytoplasma (strain OY-M)	03012 Translation factors	0.3876	605	23	59	61	35	4	0	Elongation factor 4 (EF-4) (EC 3.6.5.n1) (Ribosomal back-translocase LepA)
Q6YQV9	MARQFSLEKTRNIGIIAHIDAGKTTTTERILFHTGKIHKIGETHDGASQMDWMEQEQERGITITSAATTAFWKDHRINIIDTPGHVDFTVEVSRSLRVLDGAVTVIDAQAGVEPQTETVWRQASEYKVPRVIFVNKMDKVGADFAYAIETLKQRLGVHASAIQWPIGSENDFNGIIDLVEMNAFEYDNTSPETGKVVPIPSDLESITQTKRNELIETLSTLDEELMMYYLEEKPISSEMLKNSIRKATLQASFFPVLCGSSFKNKGVVKMLDAIVDYLPAPCDVAAIVGFDSDNQEIVRTGLDEEPFIALAFKVMTDPYVGKLTFFRIYSGSVKAGSYVTNTTKGTKERFGRLLQMHANSREEVKEAYTGDILAVVGLKATTTGDTLASEGQTIVLESM…	Onion yellows phytoplasma (strain OY-M)	03012 Translation factors	0.3876	688	24	45	41	36	2	5	Elongation factor G (EF-G)
Q6YR39	MISIQNLTFYYGCNPILKDLNLTIQNNSWVSIVGHNGSGKSTLAKILVGLLSCTKGQILIDNIVLNEKNLPLLRPKIGMVFQNPDYQFTGLTVREDIAFGLENHNVCREEIIAKVWQYAKMVKIDDLLDTNVNQLSGGQKQRVAIASILAMEPEIIIFDEVTSFLDPQGALEVQKIIQTIKNKILITITHDLEFAAKSDEIIVLDQGKLITQTPPQNLFQDPLFLQQYKLNPPLSLELYYEILKDSTTKNIKNNQMLENLKDILWQYNLKK	Onion yellows phytoplasma (strain OY-M)	02000 Transporters	0.5788	271	22	22	37	12	3	3	Energy-coupling factor transporter ATP-binding protein EcfA (ECF transporter A component EcfA) (EC 3.6.3.-)
P60470	MKKTNNIKKETMFQAQNIFLTYSQCDLSKEEIKTFIINLCNEKKLQINYLIIGIENHQDHKGKHHHVFFQLNKQFRTRDLTIFNIPKNIKEKKLIDHENIKIKDFFYSPHIEPRPGNPIKDTTDVRNYVKKDGDFIEEGTFKHVRYIKLSKNEKPTELESLTNNYFLKLRKEYQQKEINISKTKNEIFKKLKLYAESLEPNYAFKNAKRFKNMVFEYIFESDIKELPIFDFCTFKKIPILISIYDILETQKEQLSNSISKRFKTLIVEGNSKSGKTQFFKSVLTNLELPFNYIKDDVDFSDENYDEDKCVNIYDDIDIYDIQARNLTKVVIGNQKDSIVNMKYKPRTKIKGTDISIMLVNEDTSIEKYCFDNFKRGRKEYKYIRENAIFINLDKHTITH…	Onion yellows phytoplasma (strain OY-M)	03400 DNA repair and recombination proteins	0	434	37	59	30	20	5	1	Geminivirus-like replication protein (EC 3.1.21.-)
P60554	MKLNKKGLLIVLSGPSGVGKATVRKALFEMTNHNFVYSVSATTRKPRPGEQDGKDYHFLTKEEFEKGIENNCFLEWAKFIDHYYGTPKKQIQDFLKQGKEVFLEIEVEGATHLRKKRIPNTVFIFLVPPEKKALYDRLKKRGTEQEANIAKRIAKANNEFHLAHKYDYIVVNDEVANAADRIIAIIRAEHAKTKRSIRNYLKILEDNGYAEQ	Onion yellows phytoplasma (strain OY-M)	00230 Purine metabolism	0.5248	212	13	26	16	5	1	1	Guanylate kinase (EC 2.7.4.8) (GMP kinase)
Q6YQD4	MENIGIDLVEIKKIKKIGKDILAARILSSEEHQIYQIIQNPQSQLTFLAGRWASKEALFKAFQTPQKIDPTCQNYCNWSILNDKKGAPYVKNNTCTTFFNPILISITHTDNYALALVIVKKLPQSTS	Onion yellows phytoplasma (strain OY-M)	00770 Pantothenate and CoA biosynthesis	0	127	9	13	11	8	3	2	Holo-[acyl-carrier-protein] synthase (Holo-ACP synthase) (EC 2.7.8.7) (4'-phosphopantetheinyl transferase AcpS)
Q6YR34	MTTNYKTTLLMPKTDFPMKGNLGKNEINIQKHWQKLDLYQKKLQQNQDNNPFILHDGPPYANGNIHMGHALNKILKDFIVRFRSMQGFYTPLIPGWDTHGLPIEAAVLKKTSKNAFTRKPLLDKCQEFALENVNNQKHQFQRLGILGDWQNPYLTLDKTFVSDQVRIFGQMVDKGLIFKALKPIHWSPTLESALAEAELEYHNHQSPSVYVAFSMKKLDIFDNVALVIWTTTPWTLPANVAIAVHPEKEYQLIEVLQKRYLVGTKNIPFLQKVFAWNKENIKVVATFEGKTLEHLTYQNHLVSKFGKIILSQHVLDGEGTGLVHIAPGHGLDDFLVGQKYNLDVVCSIDKKGMMTDVSKYQGLFYTKANEAIISDLEKDHSLLKADVILHSYPHDWRTK…	Onion yellows phytoplasma (strain OY-M)	00970 Aminoacyl-tRNA biosynthesis	0.2408	900	51	80	105	43	6	19	Isoleucine--tRNA ligase (EC 6.1.1.5) (Isoleucyl-tRNA synthetase) (IleRS)
P62417	MTKSLTNMNITNKKVLLRADLNVPLENSVITDDNRIKAILPTLKYLVQQKAKVIIFSHLGRVKTEADKAHFSLQVVAEKIAFYLQQKLKFVPETQGNTLNQAVGQMLPGDVLVVQNTRFEDVPFKKESKNDPELGKYWASLGDVFVNDAFGTCHRTHASNVGIATYIKEKCFGFLVEKEISFLKKIVQTPQRPLVAVLGGSKVSDKIGVIRSLLQKVDVLLIGGGMSYTCLKAKCFNIGTSLLEADKIPLVKELLASPEGKKIVLPKDFVCGKEFSPTTQAAVYSYDNISDDVMGLDIGPQTIELFKTYLQTAQTVVWNGPVGVFEFEQFSKGTKALAETISNLSPNTTTIIGGGDSAAAVFKFGLDQNFSHISTGGGAFLEFLEGKPMPGLACMEKL	Onion yellows phytoplasma (strain OY-M)	00010 Glycolysis / Gluconeogenesis	0	398	18	38	42	23	6	2	Phosphoglycerate kinase (EC 2.7.2.3)
Q6YQX2	MLKKVFETTNLKDSFQVEIGTYARNVDASILVRYQDTVVLTTTVFSRKPNNLDFLPLTVIYQEKLYAAGKIPGSFLRREGRSNDHEILTSRLIDRSLRPLFPDYFQQEVQVINTVLSLDPDFKSELASMLGSSLSLLISEIPFFEAISGVYVGKINDKFIINPTLQQLANSTLHLMVAGTKHNVTMIEAHANEVSEQDFLEAINFAHQYIKKLCLFQENIKQQFAPAKITNTLHQTEQTQQQAFFAKHQSQVKQAILSCNSKNDLQQLKEQILDQAKQTPFFKTIDTATVFDYEAHKKHLQTTETLFQKLSKQETRSLILQEKIRPDKRGLEEIRTLESQIDLLPRAHGSALFTRGQTQSLAAVTLGCLSESKIIDGLSDEQNKRFMLHYNFPPFSVGA…	Onion yellows phytoplasma (strain OY-M)	03018 RNA degradation	0.5014	715	27	57	73	52	8	0	Polyribonucleotide nucleotidyltransferase (EC 2.7.7.8) (Polynucleotide phosphorylase) (PNPase)
P81958	MLFSLINQNQDLLENLFEDFKTNSLTNNNNIMKTDIQEQDNQYFITIELPGFKKEDVKVALEEGYLVVEAKNSKKNQIKEANFIRKERFQGFLRRSFYLGDDFLLEDIKGSLEQGLLKLSVPKKEVKPKEKHYIKLN	Onion yellows phytoplasma (strain OY-M)	03110 Chaperones and folding catalysts	0	137	13	18	18	6	0	0	Probable Hsp20 family chaperone
Q6YQX7	MKTMKRVKTVTARSSDFGKWYTDVCLKAELIAYSEAKGFIIYLPYGYALWENIQKHLNCTLQKTGHQNVYFPLVFPEKLFHKEKNHIQGFSPEAAMITTTGKKNLSEKLVIRPTSEILFSQYYSKTITSYRDLPKLYNQWCNVVRWEKTTKPFLRGKEFLWQEGHTVHATEQEAMQQTLSILDIYQKLGKNLLALPFVCGKKTETEKFAGALITYSIEALMHDGQALQAGTSHYLGTNFAKSFQIQFQDCDHQKKYVHQTSWGVSTRLIGALIMVHSDDEGLVLPPYVSPMQIVIIPLQPQDDAVKQTSENLFSILQKNYRVHLDLQDKTAGWKFSQYELKGVPLRIEIGKRGLENDEVTIFQRYNFAKQNIKTKDLPSQIPQLFETIHNNMYQKALQH…	Onion yellows phytoplasma (strain OY-M)	00970 Aminoacyl-tRNA biosynthesis	0.5768	474	20	43	47	23	6	7	Proline--tRNA ligase (EC 6.1.1.15) (Prolyl-tRNA synthetase) (ProRS)
Q6YPM0	MFLEKDQDNLDNLETQAKELHKDCKECKNCQKEETKTTNKDNQKEDETVKNQSNQSNQSNQTKQTNTKQQKHQPKENSHLQITKLQTQIKELQQQLTQQKKSFDEELLKNQAELINFKKRAQTQKANELKYASSNFITNLLMPLEQLEKVIDMPTQNELLQKYLLGFKLLQQQIKKVLQDEGVEEIEALNKPFDPALHHALETVCDPKKPDKTNLAVLQKGYLYKKRILRPTLVKVNEWSDKNDKNE	Onion yellows phytoplasma (strain OY-M)	03440 Homologous recombination	0.3103	247	22	38	31	8	4	1	Protein GrpE (HSP-70 cofactor)
Q6YRJ4	MPKPLIIFKDFSFQYYSQQTPTLNQINLTIYEGQKVLIVGKNGSGKSTFLKCINGLIPHSYQGKITGTAIIKDKVLTQTNIFDLSLDVGTIMQDTDNQFVGLTVAEDIAFALENDDLPQSEIYQKVNMWAQDLGLQSFLDYKPQELSEGHKQLASMAGVLIYNPSILLFDESLSNLDPVSRAKMTALIKTIHQKYHSTILVIEHYLEDILDDSFDRVIVFEDEKIIYDNSPQKLILENILTKQGIQEPTYISALKKVGINLGSLPYLLNLPALQSLDFVQYFSNQLTNLKKCAISQNDPTQLLPFFPKQFAPFCPILQLQNISYHYESKQPNILNDISLDLFPGKMISIVGKNGSGKSTLAKVICGFSNPQTGTILLNNQDLTHLSLQQRSEKIGFVMQ…	Onion yellows phytoplasma (strain OY-M)	02010 ABC transporters	0.3633	588	34	46	81	41	8	1	Putative ABC transporter ATP-binding protein PAM_020 (EC 7.-.-.-)
Q8G8D1	MKLRICELVINKTLITKTKIETILETKKKAIQNYAYILHDKDIYQNEKEAQLNGKKVGDIKAPHWHIYLRFNYSQDTKHISQWFNTQENFVSKIKGRFSDALMYMIHANRLDKHQYDEKEVVSNFDWKSEAQQDIFNRKYKMDARLKDILLKIHSGEIKEYNINDNINILENNIYATAIEKAFKFRIRDLKKKVRQMECIFITGLSGSGKSTLAKKIAEDKNYEAYISSGSNDILDDYCGEECIILDDLRSNCLGLSDLLKMLDNNTASSVKSRYKNKVLECQLIIITTVKSIDDFFEDIFRKDESIIQLKRRCKLHIKIDSKYIYYSVWNPIEMKYDLIEKKPNNLLNDFQIKSLSKKEAKDYIKSISNIDLDKDC	Onion yellows phytoplasma (strain OY-M)	99976 Replication and repair	0.4	377	27	51	33	26	8	4	Replication protein
Q6YPJ4	MHHTTKKKYGQNFLTDVNLLNKIVTKASITDKNVLEIGPGKGALTKIIVPQAKHVLAYEIDATLKPFLNFENHNNVNIIYDDFLKRDLLKDFDHYFSPNSQLSLIGNLPYYITSPILFKIIDTPQINDATIMIQKEVGMRLLAQPNNKNYNALSVIIQFLFSIEKIQEVKRHMFFPAPKVDSIVIKLTKNNNICPTFLQQFIKFVKASFKQKRKTLLNNLSCQFLLSKETIIPFFLQHHIPLQIRAEQVTLETFQKLTVKWFIFFNIS	Onion yellows phytoplasma (strain OY-M)	03009 Ribosome biogenesis	0	268	22	28	30	12	2	1	Ribosomal RNA small subunit methyltransferase A (EC 2.1.1.182) (16S rRNA (adenine(1518)-N(6)/adenine(1519)-N(6))-dimethyltransferase) (16S rRNA dimethyladenosine transferase) (16S rRNA dimethylase) (S-adenosylmethionine-6-N', N'-adenosyl(rRNA) dimethyltransferase)
P61308	MQQLAKDILASLETKMTQAQEVMLKNFCDIRTGTANPNILDKITVNYYGAPTFLKTLASISVSEGNQLNIKPYDSTLIPNIKKVLLASNLGITPQTDGLVVRLVFPKPTEERRKALMKEVEQLAEKTKVAIRNVRREGNDKIKKVELTKDLETFYLNQIQTLTDKNIKLIEKHTTTKNTELLKA	Onion yellows phytoplasma (strain OY-M)	03012 Translation factors	0	184	13	22	23	6	1	0	Ribosome-recycling factor (RRF) (Ribosome-releasing factor)
P60471	MLNKVQLIGNITHDLEQQYINTNEGKIPKVNFQLAVNNKDTTQFIPCVVFRNQADNMFMYLHKGSKVYVEGTLSIEKYINNESENKTSTKVIVQRVIFLDNKNQ	Onion yellows phytoplasma (strain OY-M)	03030 DNA replication	0.3918	104	14	10	7	4	1	0	Single-stranded DNA-binding protein (SSB)
Q6YPR6	MKTLIILKDLTKVFDNQLILRGINLEIKQNEFVTLLGPSGCGKTTILRILGGFENPSSGEVLFQEKSILNVAAHKRPINTVFQKYALFPHLNVFENVAFGLRLKDFNSKIKANLSLNKTHYQTNKANLSKTFHQELTKDLTQEKTTQITHNFNNQIETLTKDFETKQTALKCKKINKKEQEEQIQKEVLKYLKIMGLQGLEKRTIEQLSGGQQQRVAIARALINKPQVLLLDEPLSNLDLKLKQEMQYELKEIQKNSGITFLFVTHDQEEAFTMSDKVVVMNHGEIQQIGSPEDIYNEPANRFVAQFVGESNLIKGVMKDDFLVHFDNQTFNCVDKGFRKEENVDIVIRPEDIDIVSQGKGLITGIVQSIIFKGVHWEIDVKTAQRTYTIHTTDHVELN…	Onion yellows phytoplasma (strain OY-M)	2011 ABC transporters	0.3019	417	29	41	42	15	3	2	Spermidine/putrescine import ATP-binding protein PotA (EC 7.6.2.11)
Q6YR70	MKTIITNKKAFYDYSLEKKKYQAGIKLLGSEVKSIRIGKINLLNSYIHIKNEEAFIVNMTILKYPFSCCLAYDENRTKKLLLQKHEIIQIKNKIKTEKLSVIPLKVYFNKNLVKLEIALSKGKKQHDKRNALKDFDAKLRIQKTLKNFNQKQ	Onion yellows phytoplasma (strain OY-M)	99975 Protein processing	0	152	12	30	18	7	2	0	SsrA-binding protein (Small protein B)
Q6YPI0	MFFDTIAAISTPLGTGGVSVIRVSGNNSIAEINKIFKGKDLTKTKTHTITHGFILNKNQTILDEVLISVFKTPNSFTGENVVEINAHGGILITQMVLERVLSLDIRLAFPGEFSQRAYLNGKMDLIQAESIMDLIHATNENAIKIAHSGLQKYTSQLVTSLRDQILNLIAQIEVNIDYPEYDDIPQITQQKIALEVKSLIKQLENILNHSHKNRYLKEGIKTLIVGRPNVGKSSLLNAFLNETKAIVSDISGTTRDFVEAYFNCQGITLHLIDTAGIRKTDDPIEKIGILRTEKMLLQAELILLVLDQNNHLQEEDIQLLQLTKNHPRIIIGNKADLKSDKLISSLSNNSSQLAPQEIISVSSLDKTGFLELQQTILKKFQLNDIQPKDFNYFSNARHI…	Onion yellows phytoplasma (strain OY-M)	03016 Transfer RNA biogenesis	0.5835	460	32	33	58	33	2	0	tRNA modification GTPase MnmE (EC 3.6.-.-)
Q6YQA6	MSFYEELKWRNLIKDCSNETQVKELLDNNQVKFYCGFDPTSHSLTVGHLVQITMILLMQRQGHLPVILVGGATGLIGDPKETEERKLLSLENSLQNAKSIECQLKNILLNKQVEFVNNYQWLSQIDIISFLRNYGKLFNINYMLSKHAVAKRLASGISFTEFSYMILQSLDFHHLYKNHKVRLQLGGSDQWGNITSGLELIRKLEKKSDALGISTPLLLNSDGTKFGKSEKGVLWVNPSMTSPYEIYQYFLNVSDKEVINYLKMLTLIPKQEILELEKNTLENPQQRLAQKALTQNIITLIHSSDILQECIKTNQILFSNAKKESFQEKDFILLQKTLFCHSTKEDILLVDALVQTKLATSKSEAREFIKDNTIKLFNQKIKSLDFAITKKNTLFDKYV…	Onion yellows phytoplasma (strain OY-M)	00970 Aminoacyl-tRNA biosynthesis	0.5516	413	29	44	61	31	5	4	Tyrosine--tRNA ligase (EC 6.1.1.1) (Tyrosyl-tRNA synthetase) (TyrRS)
Q6YRJ5	MSKDDSIKKTVTIGLSAAIFFVLSCFASIPVGFNVSIETSVAFLAFIAVAFGPAVGFYVGLIGNTIKDFILFGNVSWNWVLCSALIGFIYGLPHKIIDLKYQVFTKKKIVYFWLYQVAFNFIIWGFFAPQSDLLIYGQPPKLVYLQSFLIVISNILAYSVVGIKLMSMYSCHYNKQATLIKINNS	Onion yellows phytoplasma (strain OY-M)	02000 Transporters	0.5792	185	9	13	18	16	3	4	UPF0397 protein PAM_019
Q6YRJ6	MQTKYDFKKVEHQRYQQWLEKKYFCANPNANKKTFTVVIPPPNVTGKLHLGHAWNNTIQDIIIRFKKMQGFDVLFLPGMDHAGIATQNKVKEQLKQEGLLTKTLSKEIFLKYAWQWKEEHAQNIRQQWQVLGLHLDYNFEKFTLDPDLSQQVQEVFGKLFQKKLIYRDYKIINWDPETKTALSNVEVNYHETEGKLYYIKYFLVDFPTNSNLSDASLVPSFLEIATTRPETMFADQALMVNPNDPRYQSFIGKKVFIPDTNIQIPVISDNYVDINFGTGVVKVTPGHDINDFEVAKRHQLKALLCMNEDGTMNDLALQYQGLDRFVCRQKLVQTLKQKGFFTKTENHLHKVGYSSISDAIIEPRLSLQWVLKTKAIAQIALKTNKINFFPLRFENIFNN…	Onion yellows phytoplasma (strain OY-M)	00970 Aminoacyl-tRNA biosynthesis	0.52	882	70	88	104	42	9	23	Valine--tRNA ligase (EC 6.1.1.9) (Valyl-tRNA synthetase) (ValRS)
Q6YQZ0	MKTTPNQKPKFFLSTAIAYASGIPHIGNVYESILADAIARFKRLEGFDVLFQTGTDEHGQKIAAKALQQGKNPQEYVDQISLEIKRIYDLMQVSYDKFAKTTNPHHKQTVQAIFYKLWQQGDIYLGKYQGLYSVAEESYVAAKDLIDGKTFNGETPILISEETYFFKLSKYQAQLLQYLENNPSLIKPDAQRKELLNLLKEPLADLSVSRTSFKWGIPVPFDPKHVIYVWIDALSNYLTGLDYNPTSKNSQFNRYWPCDMHVIGKDILRFHLIYWPILLMALEISLPKQFLTHPWILFDKNKMSKSKGNVLYVDDLLKYFPVDSIRYFVLSEIPYAQDGNITYELLVERHNSDLANVLGNLVHRVFGMVKSYRQNNLSKTLITTNLDPKFDLSKQALAT…	Onion yellows phytoplasma OY-M:	00450 Selenocompound metabolism	0.5875	520	27	43	73	31	2	7	methionyl-tRNA synthetase [EC:6.1.1.10]
Q6YRI9	MKKEILKICDLNLNFRVKKHLIYALRGINLSLGEGEILGLVGESGSGKSVISKALMGLLPDNALIQKGSILYKDLDLAQMKDKQFNKIRGNKISIIFQNPLSSLNPLIKVGKQIYESLQLKKTKSTHQQRKNQVLKLMEEVGIPEPMKRFNQYPHQLSGGMCQRIVIAIALANEAKILICDESTTALDVSVQKKILDLIKKLQKEKKLSIIFITHDLEVVKYVADRIAVIYAGRIVEYGTTHEVFYNSKHPYTWALLQSMPVFAKKGNKLKSIQGNPHLLTAPILGDAFAPRNPYALKIDFEKEPPMFKISATHYASSWLLHKFAPRIEVPDLILELQKKGGCCN	Onion yellows phytoplasma OY-M:	02010 ABC transporters	0.4563	345	16	41	44	21	5	2	oligopeptide transport system ATP-binding protein
Q6YRJ1	MILVVLFFTAVGPFINPLPKTTQEKEKSWIALLPLKIPFLEKFGIFDGTKKVDLYLDEIEQIKKFNPNIIKKQQAIKDNKQTVILDAYLYCEYEKSYINLTFTQKEYDRAKQNKSLIASTPLQNGLYRVKIRLFKYVFNKTSEKTYFYFGTTHEGNDLFTQVWKGSFISLSFAFIVSVCTLIIGTIIGAICGYYGVLVDLIVNSIVDFLSYLPFMTLVLVLMLKVGISFWTIIGVFLIKGWIGAFYYSRASFYRYKNKEYIISARMLGASDLRIMFKHIFPNIIGLMITSFALAIPGFILTEAVYSFVGVIKYPEGFISIGELLDKSFDKIGSFSYLLILPMSYLIYLMFAFNLLGNNLREAFDPASN	Onion yellows phytoplasma OY-M:	02024 Quorum sensing	0.3064	368	16	30	43	24	3	4	oligopeptide transport system permease protein
Q6YPX6	MFNVNHLSKNYVTKRGNMTMALQDVSLKLPDKGMVFILGKSGSGKSTLLNVLTGIDVANGGVVEVCKVPITTFNQKYLDNYRNGMIGFIFQEFNLIEDMNVFENIVLALQLQNKKPDVALINDLMNQVGLDVSFLNRRVNELSGGQKQRVAIVRALVKNPKMVFADEPTGNLDSETGTQVFDLLQNLSKEKLVVIVSHDSESAYKYADRILECKDGKVISDMTRKKDTTKKSKDKKQVFKEGQVLTAEMIANLTNLTKNPALENFDKTDETKVLQQDTDFVSFPSCLPFSFVAKAALKSFKNKKFFLALTVLVTAIATFIFMFFAFTFLSYKWFGICDKIYQMYELFEGYKGYVELYLFVGVVQIAVKIIQIISSPMFWVWILSVPGAMIMLYFSMSAK…	Onion yellows phytoplasma OY-M:	02000 Transporters	0.3333	542	38	50	65	37	4	6	putative ABC transport system ATP-binding protein
Q6YPX5	MLTNVYDPLKGKQFQILDENGNLVQPELEPKLSKDVLLKMYKTMVLGRQADLAALKYQRQGRMGNYLLNSGQEASQVGVAAALEPQDWVSPYYRDAGIFLYRGVSLEQFYLYWYGNEKGSQLDPKLRILPANIIIGSSVNLGAGLALASKMQNKKEVTIATIGDGGTAHEEFNAGLNYAAVFGVPLVVFIQNNQYSISNPRNKVSKAKTLAQKCYACGIPGMQVDGNDILAVYVAAQEAFNEARKGNGPTLIENVSYRLEAHSTNDNASVYRSKEEELEWRKKDPIVRFQKYLMNKGYLTQKQVEQFEKEAQEEVVLAHQKVEQTGNNIDIKDIFAYTYEKMTPQLEEQYEECKAFFNTKEGK	Onion yellows phytoplasma OY-M:	00010 Glycolysis / Gluconeogenesis	0	363	25	30	34	16	3	3	pyruvate dehydrogenase E1 component subunit alpha [EC:1.2.4.1]
Q6YR74	MLKVYYNQTILNVTLNTSLETLKNQLNLKNVYAAKVNNKLKELTFKLHAPINQITFLGAWNAAAVNIYEASLRYLVAMASYKLFENISLHFTYYSSSSILVSFPKEITFLPEMFQKIKEEMHLLVSQKLDITKKKLPLEKALQIYQSLGFGDKISLLKQKAPSFATLYFCQNYCNYMYQGLVPNTSYLDKYHLFYHQNGFVMQFVTPFSDEKIPPFQQEPLFEQMLTQSLAFKKTIQMQNVSQINQFAKTAQSQFNLINLAEINHQNQLQQLSVKIAKRASNLKIINISGPSSSGKTTFAKRLQLQLQAFGICTFIIAMDNYYLPLKDIPKEKDGISFDFESIDALNIPLFNQNIYDLLTCKKTTIPQFDFVTRSHTQKDIQTHNHIILVEGIHAINPK…	Onion yellows phytoplasma OY-M:	00240 Pyrimidine metabolism	0	546	37	43	68	37	4	3	uridine kinase [EC:2.7.1.48]
A6QKP5	MIFDFIILDPPYFKDFYLPAFEYLDKLTHQNSIIICELHRKIVLPTQIKEFVLQKEKQYGNKKIQFYQKI	Onion yellows phytoplasma OY-W	99980 Enzymes with EC numbers	0	70	2	9	7	1	1	0	N6-adenine-specific methylase
U4KM47	MCGIVGYVGKRQAKEIILEGLTRLEYRGYDSAGLSIFNQRHQIFDIYKDIGRVNQLREISKSSAFSNIGIGHTRWATHGKVSKINAHPHQSHSKRFVIVHNGVIENYQELKAQYLTNTIFESETDTEVIAQLIETFVKNLNVENAILTTLKLLKGSYALLILDTTSPEVLYAAKHKSPLILGQSNEGITIASDLMALVGYADTYVPIEDKTFIVSYETTTRFYDLDHHLIHPTFKKIELDESSVEKGAYAHFMLKEIHEQPSVVRRLVSNYLNDTYTFDQNLIEKMRQSDRIYVLAAGTSMHAGFIGKRLFESLAGIPTEVHIASEFAYQMPLLTKNPFFVLVSQSGETADLRACLVKLKKRNYEILTITNVITSTLAREANYALELFAGPEIAVASTK…	Paracholeplasma brassicae	00970 Aminoacyl-tRNA biosynthesis	0.3008	592	24	38	63	41	3	1	Glutamine--fructose-6-phosphate aminotransferase [isomerizing] (EC 2.6.1.16)
U4KSJ1	MFKYFPHTEKDIKDMLEVTNVASVDELFNSIPSKLGYQYDYNLPRSMSENELRSHFKQLEKKNQPLITFRGGGIYDHYIPSAISEIVRREEFLTSYTPYQPEIAQGTLQYIFEFQSMICELTGMDVSNASMYDGATASAEAMFMATAITKRKKILISEALFDGVKEVIKTYAKYRQIEVIEVPSKEGHLALDLSHLEDIAGLIVQLPNKYGLIEDFSLIAQKVKEHKGLMIINSDLQVHSLIKSPREMGADISIGHLQSLGMPMFFGGAHAGFLATTKEHIRKMPGRICGLTNDIDGKRGFVLTLQAREQHIRREKANSNICSNQSLMALWATVYLSLMGKQGLKEVNEQCYKNSHYLEEQLLKLESFKRVYQGFYIKEFVIETTLDRNKLETYLIKKG…	Paracholeplasma brassicae	00680 Methane metabolism	0.3235	440	15	34	45	30	5	1	glycine dehydrogenase (aminomethyl-transferring) (EC 1.4.4.2)
QYC31256	MKLNNNVAAIGLGSNLGAKKNNLQTALKMINFHPQCEVLKVSPLYETLPWGKTDQPLFLNAAALIKTFLPPLLFLDFLLSVEMKLKRKRLGLWGPRTIDLDILFLGNHTCKTPKLTIPHPYMLERIFVLAPLADILPNQIIQTKTILEWKNQLDQNAVKIIENNQWYQPSF	Paulownia witches'-broom phytoplasma	00790 Folate biosynthesis	0	171	14	15	30	4	2	4	2-amino-4-hydroxy-6-hydroxymethyldihydropteridine diphosphokinase [EC:2.7.6.3]
QYC31119	MENLSFLFLFLFFYILGSIPTGLVIGKLVQQKDLRNTGSGNIGATNALRVLGKKWGILVFLLDFCKGFVPLTICLHFSKFWLTEPSTKTFLQPNPAIKISLLAISPILGHMFSLFNKFKGGKAIATSVGIITAFNPLIGISGIIFFAIFLRLFGYASLASIIASTLVNVFLWLNYLYCGNFGTLGPIKNQIPKTELFYFSINFATLIIIAKHYSNILRLINGTENKFNFKKEK	Paulownia witches'-broom phytoplasma	00564 Glycerophospholipid metabolism	0.5872	233	16	18	34	15	3	3	acyl phosphate:glycerol-3-phosphate acyltransferase [EC:2.3.1.275]
QYC30792	MLKYIIKRLLLAISCFLLIIFCCFILTKISITKPLQPPLMSDLAWKDMCEKEGYDKPALTQFWKWFSHVCKGDFGFSTKLNQNVYDVVKSKIPITFKINIIPTLLSVPLGILLAILTTIKKNSWIDYSIIFFAIIVMTLGTLVIAIMAQYLFVHVWHLFPYQVSTSMEWKEKGFWFGVNSYLLPLAVMTLLSMVFYIRKIRAELIEQTNKNYFLLVRSKGLTFSQTINLHALKNSLVPYAPVFFDEFVGLITGSFLIERIFSIDGVGRLMIEAFQTQD	Paulownia witches'-broom phytoplasma	02024 Quorum sensing	0.2971	278	9	21	37	18	5	7	oligopeptide transport system permease protein
QYC31323	MEFDNIIKTLNEQAGREQKLTSQLIMSFLQNKNIKIPYQQIAQNLKEKGIQIISCETQAAPSLNENPNQNDTHPQTNTTNDDFTDLDSELTNENLENTDDNKDEDNTQDSEEDIQDFDISEEDLISDEKLIELEEDEDEKIYKEEISKNHSDIKMDDSVRMYLKEIGQIPLLSLAEEQKKSILVFLGKQAKQKLAKHKTKEIELSEEQLQEAHDQIEQARRAKDILVESNYRLVVSIAKRYIGRGILFLDLIQEGNMGLMRAVDKFDYQKGFKFSTYATWWIRQAITRAIADQARTIRIPVHIVETINKMALCTRKLTQKLKKKPTVEELADKMNISAEKIRSIQYIEKKPISLEAPARENEEDETSLGDFISDPNILSPHEYMMKEVTQKLLDEVLEN…	Paulownia witches'-broom phytoplasma	02040 Flagellar assembly	0	465	25	46	47	26	2	2	RNA polymerase primary sigma facto
QYC31337	MKTLIILKDLTKVFDNQLILRGINLEIKQNEFVTLLGPSGCGKTTILRILGGFENPSSGEVLFQEKSILNVAAHKRPINTVFQKYALFPHLNVFENVAFGLRLKDFNSKIKANLALNKTHYQTNKANLSKTFHQELTKDLTQEKTTQIKHNFNNQIETLTKDFEAKQTALKCKKINKKEQEEQIQKEVLKYLKIMGLQGLEKRTIEQLSGGQQQRVAIARALINKPQVLLLDEPLSNLDLKLKQEMQYELKEIQKNSGITFLFVTHDQEEAFTMSDKVVVMNHGEIQQIGSPEDIYNEPANRFVAQFVGESNLIKGVMKDDFLVHFDNQTFNCVDKGFRKEENVDIVIRPEDIDIVSQGKGLITGIVQSIIFKGVHWEIDVKTAQRTYTIHTTDHVELN…	Paulownia witches'-broom phytoplasma	02010 ABC transporters	0.3019	417	29	42	42	14	3	2	spermidine/putrescine transport system ATP-binding protein [EC:7.6.2.11]
A0A531Y2Q3	MNKDKVIQFIDGQLFKNMITNGAINLQNNYQTIDNLNVFPVPDRDTGTNMKITMMSGVKEISNLETRSIVEVSQVLSKALLMGAKGNSGVILSQFFAGMAQTYQKLNKETININDFIHSLEGGYQKAYQAIIEPQEGTILTVFREAVKQTLKAKSQFSTIEDVLSNFLQNAQKTLSQTTELLEVLKQAGVVDSGGAGFVEILKGMLLFLQDQKLLQVNQNTQTQTNPDKIQTLGQVNIKYTYCTEYIFQIKASQEKNLDMKQLKQALLQIGDSLVLVKDQEILKIHIHTNKPGQVLEKLLTYGTLKVSKIDNMKEQHQSILDKKHDTFTLQQEPTPDPKSPSNLPNSNKDQKYIFIAFVNDTKSQKVFADLKVNHIIKQSTFNPTTFEKLLQTNTSQNI…	Periwinkle leaf yellowing phytoplasma	99980 Enzymes with EC numbers	0.5722	571	45	59	67	31	2	1	Dihydroxyacetone/glyceraldehyde kinase
B1VAE1	MLMPKRTKYRRPHRVSFEGKAKGKNVIVNGNYALVAKEGAFITNKQIEACRIAMNRYMKRTGKVWINIFPHLSLTKKPLEVRMGSGKGSPEEWVAVVKTGKVLFEVKDTSNSEKVEMEALRLASHKLPIKTKIVKKGVQV	Phytoplasma australiense	03010 Ribosome	0	140	7	21	9	7	1	2	50S ribosomal protein L16
B1V8X4	MEISIKNIFEKADFYLGKKIIVNGWIRNCRFQKKLIFIELNDGTFLENFQIVYKNVDLEKIKDILQIGTSLKVEGFLKKNEKQEKNLEILAQNITLLGSSDFSYPIQPKKHSKSFLRTIPHLRTRTKLFGAVFRIRSTAFFALHHFFHKKGFFHINTPIITPNDGEGAGELFQLTSLNLERLSQEKPSTINYQKDFFGKKVFLTVTGQLEAEAMALALNKVYTFGPTFRAEKSNTPRHAAEFWMLEPEMAFCDLKQNLKVAQEMLQEVVVQCLQENQKDIEFLDQTVRNGLLQELKNVVQEKEFLVITYQKAIEILASSGVAFENKVFYGSDLATEHEKFLTEKHFQKPVFIIDWPKEIKAFYMKNNPDQKTVAAMDLLIPRVGELIGGSQREENLAVL…	Phytoplasma australiense	00970 Aminoacyl-tRNA biosynthesis	0.2167	457	24	43	51	18	4	4	Asparagine--tRNA ligase (EC 6.1.1.22) (Asparaginyl-tRNA synthetase) (AsnRS)
B1VAJ8	MINTNDFKTGQTIKFNNQIYQIIEFLHVKPGKGTAFVRSKLRNLRTGSVIDHTFNAGIKLEPALINKIKMQFLYSSQEKYIFMNTQTYEQLEINKDQLKEKLHYLYEGLLVEIIFYNNNEILTISLPDKISLKVTYAEPGVKGDTKTNSFKDATLETGLVIKVPLFINTGEKIIVNTETGLYLSRDNNK	Phytoplasma australiense	03012 Translation factors	0	189	17	20	20	8	0	0	Elongation factor P (EF-P)
B1VAN5	MLKQVFETTDLKNSFQVEIGTYARNVDPSVLIRFQDTVVLTTTVFSNKKNNFDFLPLTVIYQEKFYAAGKIPGSFLRREGRSTDHEILSSRLIDRSLRPLFPKEFRQEIQVINTVLSSNPDFKSEIASILGSSLSLLISEIPFFEPVAGVYVAYIQNQFVINPNAQQLTNSPLHLLVAGTKKNVVMIEAHASEVSEEMFLEAIVFAHEYIKKLCLFQEDVQKKVGQTKKLIDLDAELQSLEKEFNEQYHEQTRTLVANVFEQDQKNDLQVFKKKILAKAQQKAFVKTIDQITFFDVEEQKNYLLLIENLFQKLFNQEMRNYIIKNKKRPDKRTLEEVRNLDSQIDLLPRPHGSALFTRGQTQSLAVVTLGTLSESKIIDDLSGESNKRFMLHYNFPPFA…	Phytoplasma australiense	03018 RNA degradation	0.4965	710	37	60	69	51	3	0	Polyribonucleotide nucleotidyltransferase (EC 2.7.7.8) (Polynucleotide phosphorylase) (PNPase)
B1V9I4	MKVTDVKIRKINGESRLRGVASIAFDDCFVVNDIRIIEGEKGIFIAMPSRKTTKGTFRDIAHPVNTETRQVIEESILTKYQDVLNNPVEDKPEQEN	Phytoplasma australiense	99978 Cell growth	0	96	6	8	3	4	1	0	Putative septation protein SpoVG
B1V944	MKKNTSIKQTVTIAINTAIYVILSCFASIPIGPNVVLETSFSFLVFVAVLFGSKVGLSVGLLGHIIKDFFLFGNVYFNWIVCSGLLGFLFGLSKNLINLKYHSFTRKKILFFWLYQVFVNVLVFGLIAPISDVWIYAQPLKLVFLQGFLVVLSNILSYSLFGIFLMSKYSNNYGKKEVLASNNCVYYKKPPLF	Phytoplasma australiense	02000 Transporters	0.5902	193	13	15	28	17	3	3	UPF0397 protein PA0141
B3R001	MIQRESRLVVADNSGAKEVLVINILGGSTGFYANIGDIVIVTVKKAISSGAIKAGDVLKAVIVRTKYGLRRKDGSYIKFDENAVVIIKDDLTPRGTRIFGSIARELREKKFTKIISLAQEVL	Phytoplasma mali (strain AT)	03010 Ribosome	0	122	4	12	9	8	0	0	50S ribosomal protein L14
B3R0C8	MNIAVLTSGGDSPGMNAAIRSIVKVGIQNNISIYGIKYGYLGLYQNQMDLLKLEDVENIIRMGGTFLGTSRFIEFIENTNIIQKSVQNLKNKDISVLIIIGGNGSYKGALKLIDFGVKCIGIPGTIDNDISGTEFTIGFHTALNTIVESIDKIKDTSKSHKRCTLVEVMGRQKGDLALYSSICNENNLVIIPEYNNSKLNVLKKMQSFRNQEQSHAIVILTERQFDINVLAKEIELVSGFETKITILGHTQKGGIPLPQDRILGTLMGFYSIEMIRKNFFNIALGIRNNKIISYPFTEVLESKKDDIFQSLWEINNQLI	Phytoplasma mali (strain AT)	00010 Glycolysis / Gluconeogenesis	0.5183	319	27	24	29	22	3	1	6-phosphofructokinase
B3QZS5	MEEIKKRIIFLIDKINKTNYEYYTLNESSLNDQQYDALFRELLYLESKYPEYNYKFSPTTKIGGPISSKFHKFLHEKSMLSLNNVFNIKELKLFYDRISKKISNFTLLTELKIDGLAVSLKYKKGILDKAITRGDGYQGELITDNVKTIKELPLKLKEPLDLEVRGEVYMSYESFNYLNQIRKKENKSLFANPRNAASGTLRQLDSKVAAERNLSIFLYTIVNPPKFIITQKSILEFLTYLQFPVNNYYEYVLNWDQLIKKISYYEEIKNHLGYNTDGIVIKINELSFHSIIGYTSKAPKWAIAYKFKVFKTETLINNILFQIGRTGIVTPIAELLPTIVDGSVISKVNLHNFDYIKQKDIRVNDFVLVHKSGSIIPEIIEVIKTKRKNQIPFEMITHC…	Phytoplasma mali (strain AT)	03030 DNA replication	0.5515	659	61	87	76	43	5	2	DNA ligase (EC 6.5.1.2) (Polydeoxyribonucleotide synthase [NAD(+)])
B3QZN3	MQFDVEKIKFLRNKTQAGIMDCQKALINSKGDIDQAIIFLRKQGIKKASEITGKILGEGLTNVIIDNNEAVLYELNSETDFVAKNKIFLDLLNLLGKILLKETKPNMNIDEILNLKFEDKKIKDLLLEKTAIVQEKICLRKVIKVIKKDDENFGMYKHQNGFISVLVITKNSKKDVSEDIAMHIAANKPKFINKEQVDLETLNQEKSIIEAQVNKELGNEKTFNIKEKIIEGRLNKFIQNICLIEQSFVKNPEQKLRDYLKEKEVEIINYWRLEVGERI	Phytoplasma mali (strain AT)	03012 Translation factors	0	279	24	41	29	8	3	1	Elongation factor Ts (EF-Ts)
B3QZH5	MSSKVFLRDKVHVNVGTIGHVDHGKTTLTAAITKILSTKGLAENKSYDQIDKTKEEKERGITINTTHVSYETEKRHYAHVDCPGHADYVKNMITGAAQMDAGILVVSAYHGVMPQTREHVLLAGQVGISKLIVFLNKCDLVKEEEWIHLVEMEVRELLNEYKFDGDKTPFVRGSALKALEGTDVEGINKLLEVLDEYIEDPIRDVEKPFLMPVEGVHTITGRGTVATGRVERGKIKISEEVEIIGLKETKKAIITGLEMFKKELDFAQAGDNVGILLRGITRDQIERGQVLAKPGSLNAYHKFLSQVYILTQQEGGRHTAFFSNYRPQFYFRTTDVTGFIKLKKDVKMVLPGDRTELIVELNHPIAIEAGTKFSIREGGRTIGAGTVTEIIE	Phytoplasma mali (strain AT)	03012 Translation factors	0.2898	392	11	33	32	13	2	1	Elongation factor Tu (EF-Tu)
B3R0J1	MYSYIKGKVVNNGQNFVIVDNNNIGYHIIVSNPYFYEINKEYKFFVHFHIKENLQILYGFNDNKNLLFFKKLLDVPTIGPKSALMLSETDNLEQVFQAIENNDNVYLRKFPGIGIKSAQQIILKLKGDLIFSEKIILNPKKTELEKILLNLGFVKKEIKSVLNQIDDKKELELMLKEVLLKLAKNI	Phytoplasma mali (strain AT)	03400 DNA repair and recombination proteins	0	186	20	25	25	7	0	0	Holliday junction branch migration complex subunit RuvA
B3QZS7	MINAKKINADLFKKMITNGAINLKNNYKKIDNLNVFPVPDGDTGNNMKMTMMEGIKEINKIQSDSIIKIAEVLSKALLIGAKGNSGVILSQFFAGIYIKLKEINKNTINISEFMKTLICGYQKAYQAVSEPTEGTILTVIRESVESMKEIEYKDQDINELMQKIIKNSEISLEKTPQLLPILKKAKVVDSGGAGFIEILKGMLMFLQGNKLEYNNKEEENNNFEAIHNLDIEELKYIYCSEYIINLKNDNQIDKEKIKKKLHNKGNSVVLIIDENILKLHIHTNNPDIVLNYLLNYGELNKIKIDNMKQQHEKIIKTKKNNQLKEKKNSKYTIITVVSGNKMLQSFQELNADIIIDETINMSLKVNDFIEKIKEIDNRNIIILPNRTKIYLEVQKIINI…	Phytoplasma mali (strain AT)	00561 Glycerolipid metabolism	0.4416	494	64	70	49	20	3	0	Kinase related to dihydroxyacetone kinase
B3R068	MKNSPTVEKLIESFTLLPGVGKKTAERYTFFLINQKNKNKILYLSKHLKELVNNIKSCNICGYITEKNICNFCSDSQRDHSTIMIVADNRDVYCFEKINHYHGLYHILGGLIDFSRCIKPENLNFNSLKDRLKTIKEIIIATNSTLEGEITATYSKKFLKKYLKDEKIKITKLAYGIPIGLDFNYLDEKTLCNAINNRNNFKGENE	Phytoplasma mali (strain AT)	03440 Homologous recombination	0	206	22	26	21	11	7	0	Recombination protein RecR
B3R0F3	MKNYSFTFDIPQLRKLKKIYKSFLIEKEINNNSIYFFLKKDNIQMIAYNNGTFFIKGENIQEEILNIKEILNIKDYSAIGSDEVGTGDVFGSIVVCSSYVSAENIPFLENLNIKDSKKLTDEKIIQLVPKIINKITYSLISINPYKYNILTNKGFNLNKIKAILHNDMILKNLIKIKKNVNVILDKFTSSKNYFNYLKNEKKVYKKIFFCNKAEKVHISVAAASIIARYAFLKNIFALSKKIGINLKLGASTEVDKQINFIYKKYGMNILKKIAKCNFKNITKQFIKN	Phytoplasma mali (strain AT)	03030 DNA replication	0.4566	288	34	47	23	18	3	0	Ribonuclease HIII (RNase HIII) (EC 3.1.26.4)
B3R0Q2	MKLNHIPVLPKEVLKYLNVKSSGIYVDATLGGGGHSELILEKLKKGFLYAFDQDIFAIKQSKKLFANNHKIELIHSNFFFLKQELNKRGVFFVDGIIFDLGLSSFQIDDKERGFSYLSNEFLDMRMDREQKLTAHYIINNYSFEKLRNIFFNFGQEKNSSLIAAEIIKKRPLNTTFELVEIADKFNYNRKGHSSKKIFQALRIEVNKELELLQKTLHQCLSLLKEGSSIVVISFHSLEDRLVKNFFRANSIINLPTKLPIVSNFKTVLKIITKKVVKPSLEEIAFNHRSRSAKLRAAVKN	Phytoplasma mali (strain AT)	03009 Ribosome biogenesis	0	300	22	35	37	24	1	0	Ribosomal RNA small subunit methyltransferase H (EC 2.1.1.199) (16S rRNA m(4)C1402 methyltransferase) (rRNA (cytosine-N(4)-)-methyltransferase RsmH)
B3QZW6	MGLTNEKLASLIKKELALIINVSIRNNKIGFINVTEVKLTNDLSFANVYYVILNNQPEFLSLAAEIIEKNKSTIRMLLAKKIRNIRKIPELVFIYDTSLEYGNHIDNILKGINK	Phytoplasma mali (strain AT)	03012 Translation factors	0	114	14	12	15	6	0	0	Ribosome-binding factor A
B3R0A1	MKKALVIKFFMGNYLISDIETKDKITAQVKGKLKNYDTHKKELFIIKVGDIVIYENYLDRYLISEVLERHNELNRPNIANFNQVILVFSLYKPRFQFRLLDKFLLILNKYKLKIILIFTKIDLITKKKFLIIQKKISYYENFYRIYYVNSKNKNSTHHLMDIFSNKITVLAGQTGVGKSTFLNSLKPSLQLKTQEISKKLGLGKHTTKNAQLYEFNGGYIADTPGFSKLDLTIFDYEELKFFYPDFLLYSDKCYFKKDCSHIKEINCGVKKALKLSLIPDWRYDNYLKFIEKIQEQKKLNYNKK	Phytoplasma mali (strain AT)	03010 Ribosome	0.5578	304	21	47	38	15	3	1	Small ribosomal subunit biogenesis GTPase RsgA (EC 3.6.1.-)
A0A859IAI4	MNKDKVIQFIDGQLFKNMITNGAINLQNNYQTIDNLNVFPVPDRDTGTNMKITMMSGVKEISNLETRSIVEVSQVLSKALLMGAKGNSGVILSQFFAGMAQTYQKLNKETININDFIHSLEGGYQKAYQAIIEPQEGTILTVFREAVKQTLKAKSQFSTIEDVLSNFLQNAQKTLSQTTELLEVLKQAGVVDSGGAGFVEILKGMLLFLQDQKLLQVNQNTQTHTNPDKIQTLGQVNIKYTYCTEYIFQIKASQEKNLDMKQLKQALLQIGDSLVLVKDQEILKIHIHTNKPGQVLEKLLTYGTLKVSKIDNMKEQHQSILDQKHDTFTPQQEPTPDPKSPSNLPNSNKDQKYFFIAFVNDTKSQKVFADLKVNHIIKQSTFNPTTFEKLLQTNTSQNI…	Rapeseed phyllody phytoplasma	99980 Enzymes with EC numbers	0.5704	571	44	58	66	31	2	1	Dihydroxyacetone/glyceraldehyde kinase
A0A1S2NIT3	MNKDKVIQFIDGQLFKNMITNGAINLQNNYQTIDNLNVFPVPDRDTGTNMKITMMSGVKEISNLETRSIVEVSQVLSKALLMGAKGNSGVILSQFFAGMAQTYQKLNKETININDFIHSLEGGYQKAYQAIIEPQEGTILTVFRKAVKQTLKAKSQFSTIEDVLSNFLQNAQKTLFQTTELLEVLKKSGVVDSGGAGFVEILKGMLLFLQDQKLLQVNQNTQTHTNPDKIQKLGQVNIKYTYCTEYIFQIKESQEKNLDMKQLKQVLLQIGDSLVLVKDQEILKIHIHTNKPGQVLEKLLTYGTLKVSKIDNMKEQHQSILDQKHDTFTLQQEPTPDPKSPSNLPNSNKDQKYFFIAFVNDTKSQKVFADLKVNHIIKQSNFNPNTFEKLLQTNTSQNI…	Rice orange leaf phytoplasma	00561 Glycerolipid metabolism	0.5662	571	46	63	67	31	2	1	Kinase
R4RPE8	MFLGLYNYTTYLTYLNLLSGFFGIIFAVQGQYIPALIFLLLSGICDMFDGLVSKTKKNRTLFDKRYGVQIDSLADIISFGVLPIFINYSLAFKNNKQEYPFHEYFIWPVWGLYLLAVLIRLAYYNTLSENDINKGSKKFIGFPVTTSAIVFPLLGFFTKLNDSYPWFKIHLGSIMILTFLFLCDKIIIRKPKYKKTIIIFGLFGLVEIFILFGVHILRTRS	Strawberry lethal yellows phytoplasma (CPA) NZSb11	00260 Glycine, serine and threonine metabolism	0	221	10	16	32	12	2	3	CDP-diacylglycerol---serine O-phosphatidyltransferase [EC:2.7.8.8]
R4S0H5	MEAQIVLKNPLRSLFPIFKANPKLVYFDSAATSLKPKKVIDELTSFYYNNGMANKSFAFLSSQTNLLINETRKKTAFFLNCLPEEIIFTKGTTDSLNLLAQSLGELLEEGDEIIVSELDHNSSVLPWLKQAKRKKAKIVFVPLDSNNKITVENFSKVLTKKTKIVALTHVSNLLGYMTPIKEIIDLSHQQNTLVVIDAAQSAAHFPIDVKALNSDFLAFSAHKLYGPFGVGVLFGKISLLKKLKPTFFGGNSIQEFSLNDFVLNEPPHKFEAGTLNIAGIIAFKKALEFIQEIGFEKIQSIEKNIYQGIIKELEKIPEITIYNPQSLDIISFNFNHIHAHDVENFLAQENIYVKTGRCCAFLAAKKINQTSLVRISVGVYNNQEDIDILIKNLKKARDF…	Strawberry lethal yellows phytoplasma (CPA) NZSb11	00450 Selenocompound metabolism	0	406	30	43	45	27	4	1	cysteine desulfurase / selenocysteine lyase [EC:2.8.1.7 4.4.1.16]
R4S075	MDQSLPQNNQKTLMANNAVIVRKWYLVDAKDKTLGRLATQVATILKGKHKTNYTPHVDNGDYVIVINASHIKLTGKKWSQKVYYKHSGYPGGLTGVVASDLMRKFPTRIVEKAILGMIPHTKLGSQIGKKLFVYSQENHSHQAQKPEILEV	Strawberry lethal yellows phytoplasma (CPA) NZSb11	03010 Ribosome	0	151	8	18	13	8	0	2	large subunit ribosomal protein L13
R4RZV3	MIGALNANEQRQKELGEVIPYFKVTASILIKKENLKDYQKLKDEINPQKIQEISDKKKIITFPSSLYVQKLKEYFENNPKFQVDENNFRDNLPAVLDLIKKGNTDAFVNDTPVIQNIVNNFPNDFASVELNNNVFGDLKPFGLFVNSSYPNKAKIKEALLKVLDLNTKPLKSEDEIDAISDAYKDIFLNKAIKNYQQIQQKLKNQKPFPGFIKLTKKIWSTLPTYKKGFITSFIISIDSVILGFLLALIFVKTKTLIKHYQKTNQKNLMRVYRTFSFFINKTISFLNAIPLTIQALLVFNLFNLFQILRNNTMNFYAALFVLVLNTAANLVKIMMHNIKILSQGQIEAGYALGMSHKQVFHYIIFEQGIKRSYPSVGQQFINNIKNTSLFQIIGLSSLL…	Strawberry lethal yellows phytoplasma (CPA) NZSb11	02010 ABC transporters	0.2422	443	42	49	50	22	1	2	putative lysine transport system substrate-binding protein
R4S032	MALESKISLLKKTDFIRLLQKINVKRVIITQESRFGYQKEGNYQTLKQAGFLVDLIDDYVKPNGCQQKISTTCIKKLLTQGKIDDANLYLSRPYKIQGKVIQGKQRGRLLGFRTANLELINFFLPRLGVYAVFVTYKKEKYAGIANLGVRPTFEQKPQKLLEIHLLNFDQNLYHQTIEVEFIAFLRNEKKFENVSQLIFQIKKDVLDAKTLLKTKM	Strawberry lethal yellows phytoplasma (CPA) NZSb11	00740 Riboflavin metabolism	0	216	11	27	29	6	2	0	riboflavin kinase / FMN adenylyltransferase [EC:2.7.1.26 2.7.7.2]
R4S0E6	MTPIKKNTKNPLKFMKIKKIIVFIFLDIFLLYLFIVSLGRVFLKEKCPKYLGFSFFNVASGSMEPYIKGPPMGSNSEIGDTVFVRGVWDCKNLKAFKNNACGKEPAQKPFNNDPKNTEYNPNDGDIVVFKSTTKKDKIIIHRLIYNDTENKCLYTWGDNNDHQLSDEKKIPYENVVGKLMFKDRYFIPTINKLIEYFGNKPLYAVFTIIYLIVMFVLLGIIKKNWNQADE	Strawberry lethal yellows phytoplasma (CPA) NZSb11	03060 Protein export	0.3029	230	21	30	18	8	4	3	signal peptidase I [EC:3.4.21.89]
R4S2D1	MMKEKKMKKNKTITNIDGILFQKMIINGAVNLHNNYHKIDNLNVFPVPDRDTGTNMKITMMSGVEAIKNLKNDSIVEVSQILSKALLLGAKGNSGVILSQFFAGMGETFAKLQKNSIHLEEFMQSLENGYKKAYQAIIKPTEGTILTVFRLAVEKTSEQKNKFTSIIDLIELFLNNAKEALKQTTNLLAVLKKAGVVDSGGAGFVEILKGWLHFFKENQMIELKDTSIKTETAHHIHHLGEVDIKYIYCTEYVFELKNNDCDTEELGAYFETKGDSLVLVKDEEILKIHIHTNCPGTILEKLLNYGNLKISKIDNMKEQHQKIIDEKPTSEKKQHSLIVFVKDAKMEKLLSDFEINYIIPQKDFTKEALLKVINQIDSPYIFIFPNNLEILNELKKNTI…	Strawberry lethal yellows phytoplasma (CPA) str. NZSb11	00051 Fructose and mannose metabolism	0.6744	554	43	66	58	28	4	2	DAK2 Domain Protein
A0A660HMD4	MNIILIGPPASGKGTQSLILSKHLNIPHISIGDIFRENLRNKTDLGKIVKSYINKGLLVPDKITNSMISKYLTNENINKGFILDGYPRNLEQASFLTEELANKQIFLNKVFYFNVSEKLLEKRIMGRIVCPQCGEIYHKENKSPEKYGFCDNDNTYLIQRKDDNLNTFKKRLLVYKKETFPLIEYYQKNNKLTEIKVDESPKSIKDITEIILKEISDIK	Ziziphus jujuba witches'-broom phytoplasma	00230 Purine metabolism	0.493	219	20	28	23	13	3	0	Adenylate kinase (AK) (EC 2.7.4.3) (ATP-AMP transphosphorylase) (ATP:AMP phosphotransferase) (Adenylate monophosphate kinase)
A0A660HN19	MNINKTKLMIYLFLILLSIFIAKELIDDFFTKGTKVENNQIIQMIKNSNIEKITHEEPGNKLLNQNRIKIRAYTRNKEIFWTKMDFTFYSGMISLLIERPSIKFEPVYFYNFNFLRFLFDIIPIFSSSVFIFYIINNIKKTSNKLNSNPLISSKQKSRFTFKDVAGNEEEKEEMKELIDFLKRPQKYVAVGAKIPKGILLEGPPGTGKTLLAKALAGEVGVPFYAVSGSEFVEMFVGVGASRVRKLFKEAKNNAPCVLFIDEIDVLGGKRSGFSGGPQETNQTLNQLLTEMDGFSQYQGIIIIGATNRADMLDAALLRPGRFDRIFKVGLPDVKSRESILKLHARNKKVAPEINFHQLAKQTPYMSGAQLEAVLNEASILTVRNQKEMITMEELEEAID…	Ziziphus jujuba witches'-broom phytoplasma	01002 Peptidases and inhibitors	0.3585	583	33	61	54	36	4	1	ATP-dependent zinc metalloprotease FtsH (EC 3.4.24.-)
A0A660HMI2	MKSKRDYYDVLEVSKNASDTEIKKSYRKLVKKYHPDVSKEDNAAEKFKEVQEAYQILSNAQKRSDYDRFGHQDYSNFNNSGFQGFNQGFSSSDFGNFDDIFGSFFGENRTNKQKNTNNVQDKYVECVIDFLEACLGGKKEIKINFEEDCKQCNGTGAQNKEDVRICNYCNGTGHITKYQRTFLGNIGTQQVCSYCRGEGRIITKKCSSCKCSKRVSNVKTINIDIPAGVEDGMTMKLDQQGHGGHLNSKNSDLYVTFKIQPHEFFEREKQNIISTVWINFYDAILGKELNIPTIYGDVELKIPEGTQTHTKFKLKNKGIPYLHSNFRKGDHFVIVKIKTPTKLSSHQKKLIEQIKELDTFNENIKKNKSWFF	Ziziphus jujuba witches'-broom phytoplasma	03110 Chaperones and folding catalysts	0	372	31	46	17	25	11	2	Chaperone protein DnaJ
A0A660HLS5	MTEYRIIDGDLFKKMIINGAFNLKKNHQQINDLNVFPVPDGDTGTNMQMTMMEGVKKLQLINDSSIITVTKVLADALLMGSKGNSGVILSQFFSGIHDYIDRLQKNKINVEEFISSLVNGYQKAYEAVIEPVEGTILTVLRESIEETVKQKEEIKTIKQVIQITIENAKISLQKTPNLLPVLKKSKVVDSGGAGFIFILEGMLLYLDNVELENDDVQDFDLKSNHDIHEISDFKNQYCTEFIIKLNNLDKFDINNYKKQMSYYGDSLILFKNNDLLKIHIHTNNPDDVLQNLLLHGQLIKSKVDDMKKQHSEFIANNKNENKEDLVKYSIITFVSEYEEKEVFDTLKELQSDFVINLKTKDFSIENLNKIINKVDAENIVLFPNEPKVISIIEEVCKLY…	Ziziphus jujuba witches'-broom phytoplasma	00561 Glycerolipid metabolism	0.5882	541	53	65	60	31	2	0	DhaL domain-containing protein
A0A660HMM4	MEKKVVILESPSKAKTISSYLGDDFLVLSSKGHIRDLALSGSGRLGVDIKNNFHPDYIIIDKQQQTVQDLIRKTKNKKVFLAMDPDREGEAIAWHLSQVLNLDKKDKNRILFNEITKSVIQKAFTVPSVINEKLVDSQETRRILDRIIGFKLSGLVKKVNAKSAGRVQSVALKLIVGLEEERKKFVPEEYNLIRVHFDNFQANLVIIPKDHKIKEEEAFQIFNKIKDKKFLLESIQNKKVIKKPPKPFITSTLQQDAFQNLSMGAKNTMITAQKLYEGVEIDNLRVGLITYMRTDSFRISDEFSTTIQSFIKKQYGKEFLGSAQTSKYNKNKNISDAHEAIRVTDITRTPDSLTKYLTKYEFYLYNMIYERTLASFMSEAVINKNQFCFKVDKYNFLAE…	Ziziphus jujuba witches'-broom phytoplasma	03032 DNA replication proteins	0	650	32	88	60	44	10	1	DNA topoisomerase 1 (EC 5.6.2.1) (DNA topoisomerase I)
A0A660HMR7	MKEIRLRYAPSPTGFLHIGNARTALFNYLFARRYKGKFIIRIEDTDLKRNIKESELSQLEQLRWLGLFWDEGPDLKGPFGPYKQSERISIYQKYTQILLDKKLAYKEYQGDNDKCVVRFKVPLNTLYEFNDMIRGKLSFESDQIEDWIIIKENGFPTYNYAVVIDDYLMKISHVLRGEEHITNTPKQIMIYKAFGWDIPIFGHMSLILNKNKKKLSKRDVDIVQFIKKYIDLGFLPKALFNFLFFLGFAPKTNKTILSIEEMISLFDKTRFVKAPAVFDDQKLSFINNQYLKQMSVTEIVGKSKFFLEEKKIFLEDKYLQNIIILFRDRMNYIQEIVNLYLEFFEQNQQIDNKIIHIIKEIEDFSVIKILKDLFLKLEIFQSSFIEQLIQKFSELTNLK…	Ziziphus jujuba witches'-broom phytoplasma	00970 Aminoacyl-tRNA biosynthesis	0.528	444	26	50	57	19	2	4	Glutamate--tRNA ligase (EC 6.1.1.17) (Glutamyl-tRNA synthetase) (GluRS)
A0A660HM41	MLKYPFQKKHINKSNLGMNLERDINLTNLFYQDKKIALIYKNAIPIQVVKVDYSSRQRAKIIEAYYHSKSLPDYQGIYRGRYLCFDVKETNNKTSFSLSNIPPHQIQKLQLIEQFHGIAFFIINFKAKNKYFYLPINFLNDYMQNSKMKSINYKIFEENLYQIPVSYSPRLNYLKIVDNFI	Ziziphus jujuba witches'-broom phytoplasma	03400 DNA repair and recombination proteins	0.5946	181	18	20	16	12	1	0	Holliday junction resolvase RecU (EC 3.1.21.10) (Recombination protein U homolog)
A0A660HMF7	MLYAEVIVDNKIPNLSQCFDYLIPEYLVKIAQRGMRVIVPFGNKNTERLGYILKLKEITLVEPKYIKSIIEILDDIPFLNEEFFLLAEEILKIPFINPALAYNTIMPRSFLSTYIRQITIIKEKELNKEIKEYLIKKKGILSLKDIVLSTEELFKLQKKEIIKTKIIISKKDYRPSIEPEIIKHKNEIILNFKNTFCLNEKQDLIWKQISWDGYKNYLLYYDCYEDKIAIYLKLIEKTLQQNKQVLILVPEILLISFLKEQIKKYFPEILLTVLTYESDYKEHYQKNQDIQENKIFIVMGTRKVIFAPLKKIGVIIFDEENDESLIEKDKSPNYDSKELAYIRSRYHKIPLIFFTTMPSIESYCRLKQKKIIFLNLTHKNKQKMQLIDMKEELKKGNVS…	Ziziphus jujuba witches'-broom phytoplasma	03440 Homologous recombination	0.3281	718	44	95	92	39	14	3	Primosomal protein N' (EC 3.6.4.-) (ATP-dependent helicase PriA)
A0A660HMG8	MFDHDNIAAIATPLGTGSISVIRVSGSGVIENISKIFKSVKKNFDLLKAPSHTIHYGFILDKNQNILDEVLISVFKKPHSFTGEDIVEVQGHGGILITQLLLERILSLNIRLAQPGEFSKRAFLNDKIDLIQAESIMDLIFAQNENVVKLSNLGLQKKNSQLVENLNKKIMKIIGQIEVNIDYPEYLDIEQMTNEIILPQIKELITQMEELLNLYFKNRFLKNGIKTLIIGKPNVGKSSLLNVLLQEKRAIVSDIAGTTRDYVDGFLNIKGVSLFLIDTAGVHETNDPIEKIGVENTKTLLQKADLVLLLLDKSNYLEKDDEILLELTKKYPRIIIGSKSDLPSKINFDKNLKEMVSISNHTQEGIEDLKNNILKIFQLDTIQDKDFNYLSNARHIKQI…	Ziziphus jujuba witches'-broom phytoplasma	03016 Transfer RNA biogenesis	0.5871	457	38	44	63	28	1	0	tRNA modification GTPase MnmE (EC 3.6.-.-)
A0A660HMY9	MFLFQELKWRNLIKNLSNEKKLEQLLNQGQLNFYCGFDPTAISLTIGHLVQIITILLLQKKGHKPFILLGRATSLIGDPKEKEERKLLSLEDVEKNFFKIKKQLMKILPEDKVTFVDNYEWISKINLIDFLRDYGKYFNVNYMISKDKIAKRLDKGISYTEFSYMILQAVDFYFLYKKYNVNLQLGGSDQWGNITAGLELIRKKKFDESSEKPFGMSMSLLLDNKGVKIGKSEKNVIWLDEKITTSYQIYQFFLNVDDQNVINHLKMLTLLEVDKILELEKEVKMNPSYRLAQKELAKQVVSFVHGKEIFKECFEVNNILFFNKSKALNENDFVLLKKHLVFIEVKEKEISLVDALLETKLADSKKQARTLIISKSIKIFHKSIDKVDYVLDFDIALFS…	Ziziphus jujuba witches'-broom phytoplasma	00970 Aminoacyl-tRNA biosynthesis	0.5516	418	26	59	58	24	2	4	Tyrosine--tRNA ligase (EC 6.1.1.1) (Tyrosyl-tRNA synthetase) (TyrRS)
A0A660HN11	MKTKYSFQTVEKGRYQKWLNKDYFRTENNLTKQVFTIVIPPPNITGKLHLGHAWNNTLQDILVRRKKMLGYDILFLPGMDHAGIATQNKIRQKIREEGILDQNLTKEIFLKYASLWKEDYSKIIREQWASLGLFLDYKYEKFTLDPPLTKTVEKVFIKLYKDNLIYRDYKIINWDPLMKTTLSNIEVNYQEIKGKLFYLKYFLFNDSNFFLEVATTRPETIFADQALAVNPKDSRYCDWIGKKVLIPFTNRMISVIQDESVDMEFGTGVVKITPAHDENDFQIGKKNNLKFVLCINEDGIMNEIAEKYQNLSILECRRKLINDLEKINLVSMIKEHKHMVGFSSISGSMIEPRLSLQWFLKMKELSSFVLKKHNINFLPQRFLKIFNSWLVNVEDWCIS…	Ziziphus jujuba witches'-broom phytoplasma	00970 Aminoacyl-tRNA biosynthesis	0.5594	856	68	97	99	46	6	24	Valine--tRNA ligase (EC 6.1.1.9) (Valyl-tRNA synthetase) (ValRS)
